# Supplementary material for: Open Source Drug Discovery with the Malaria Box Compound Collection for Neglected Diseases and Beyond
Source: PLoS Pathog. 2016 Jul 28;12(7):e1005763. doi: 10.1371/journal.ppat.1005763 (PMC4965013; doi:10.1371/journal.ppat.1005763)

| <b>MMV Number</b> | <b>NSC Number</b> | <b>MGLI50</b> | <b>Notes</b>                |
|-------------------|-------------------|---------------|-----------------------------|
| 007384            | 766470            | -7.34         | Colon, differential, potent |
| 019074            | 766523            | -4.91         | Specific lines sensitive    |
| 665803            | 766546            | -5.01         |                             |
| 665796            | 766556            | -5.00         |                             |
| 020275            | 766585            | -4.93         |                             |
| 000760            | 766634            | -6.02         | Differential                |
| 666020            | 766672            | -4.90         |                             |
| 665969            | 766692            | -6.29         |                             |
| 666597            | 766722            | -5.57         | Differential                |
| 006962            | 766755            | -5.61         | Differential, CNS           |
|                   |                   |               |                             |

MGLI50 = Mean Growth Log I50

Leukemia

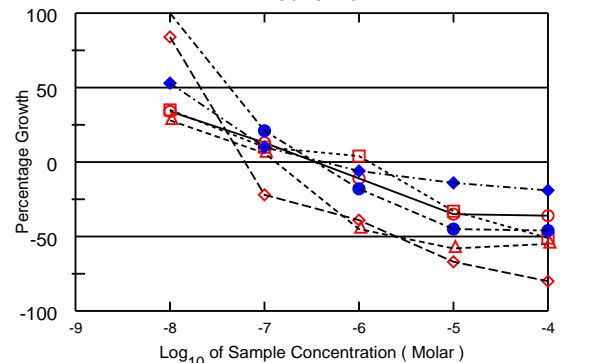

Non-Small Cell Lung Cancer

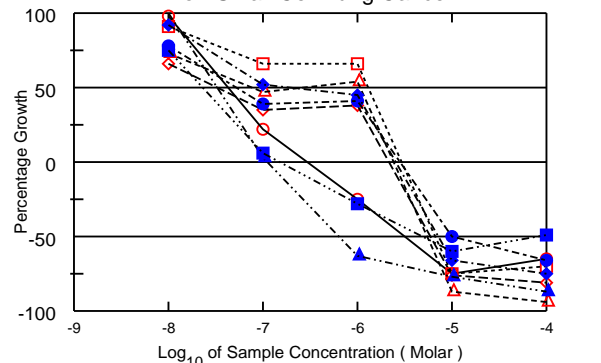

Colon Cancer

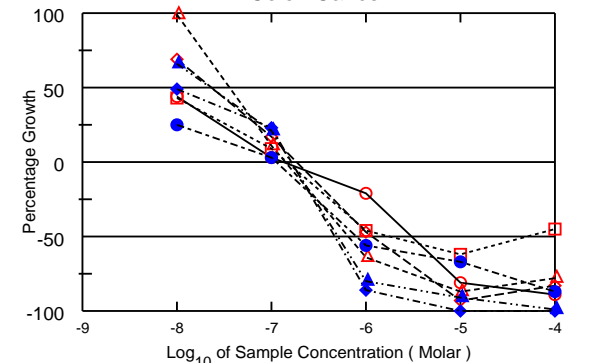

CNS Cancer

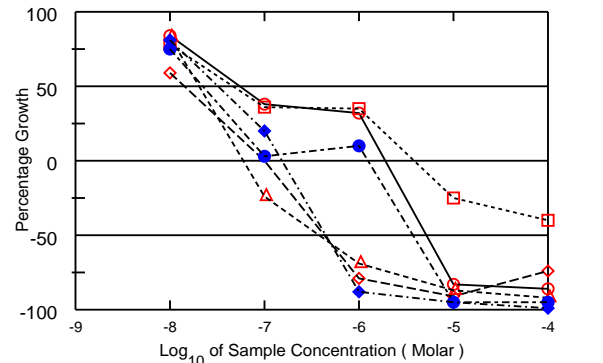

Melanoma

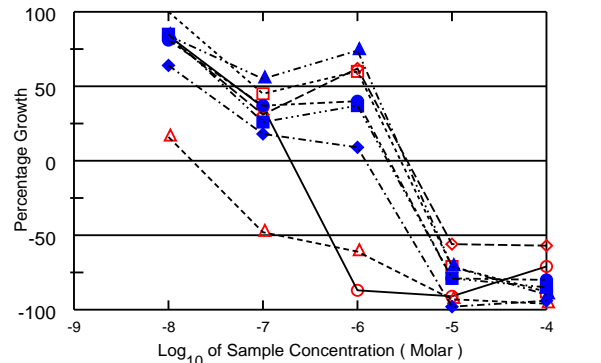

Ovarian Cancer

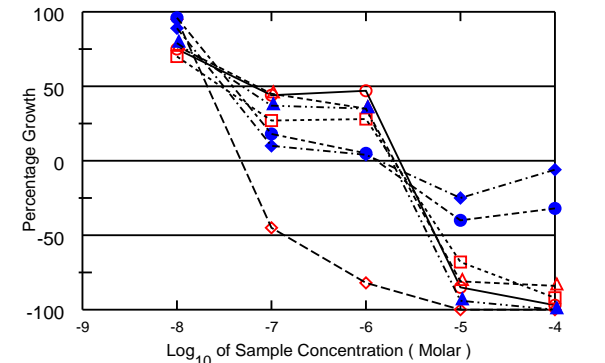

Renal Cancer

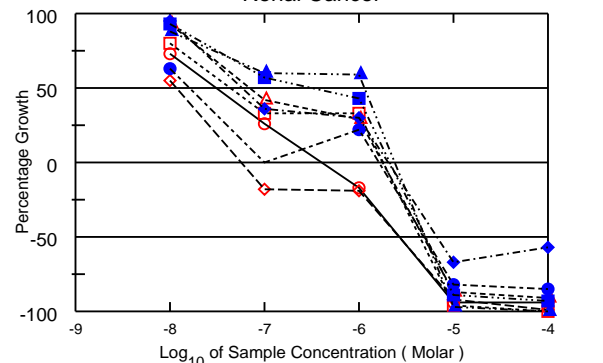

Prostate Cancer

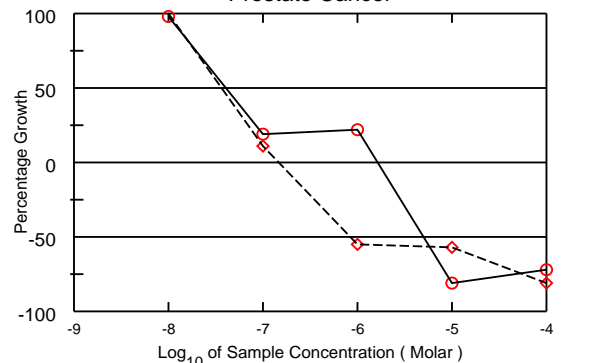

Breast Cancer

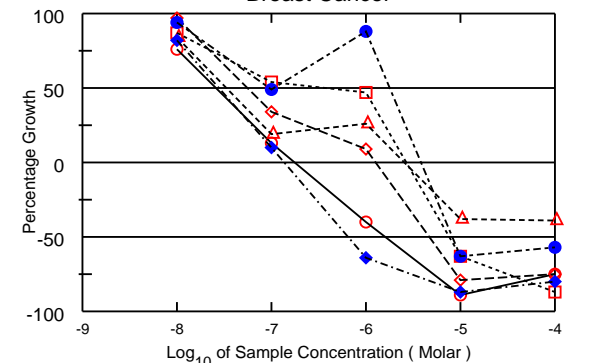

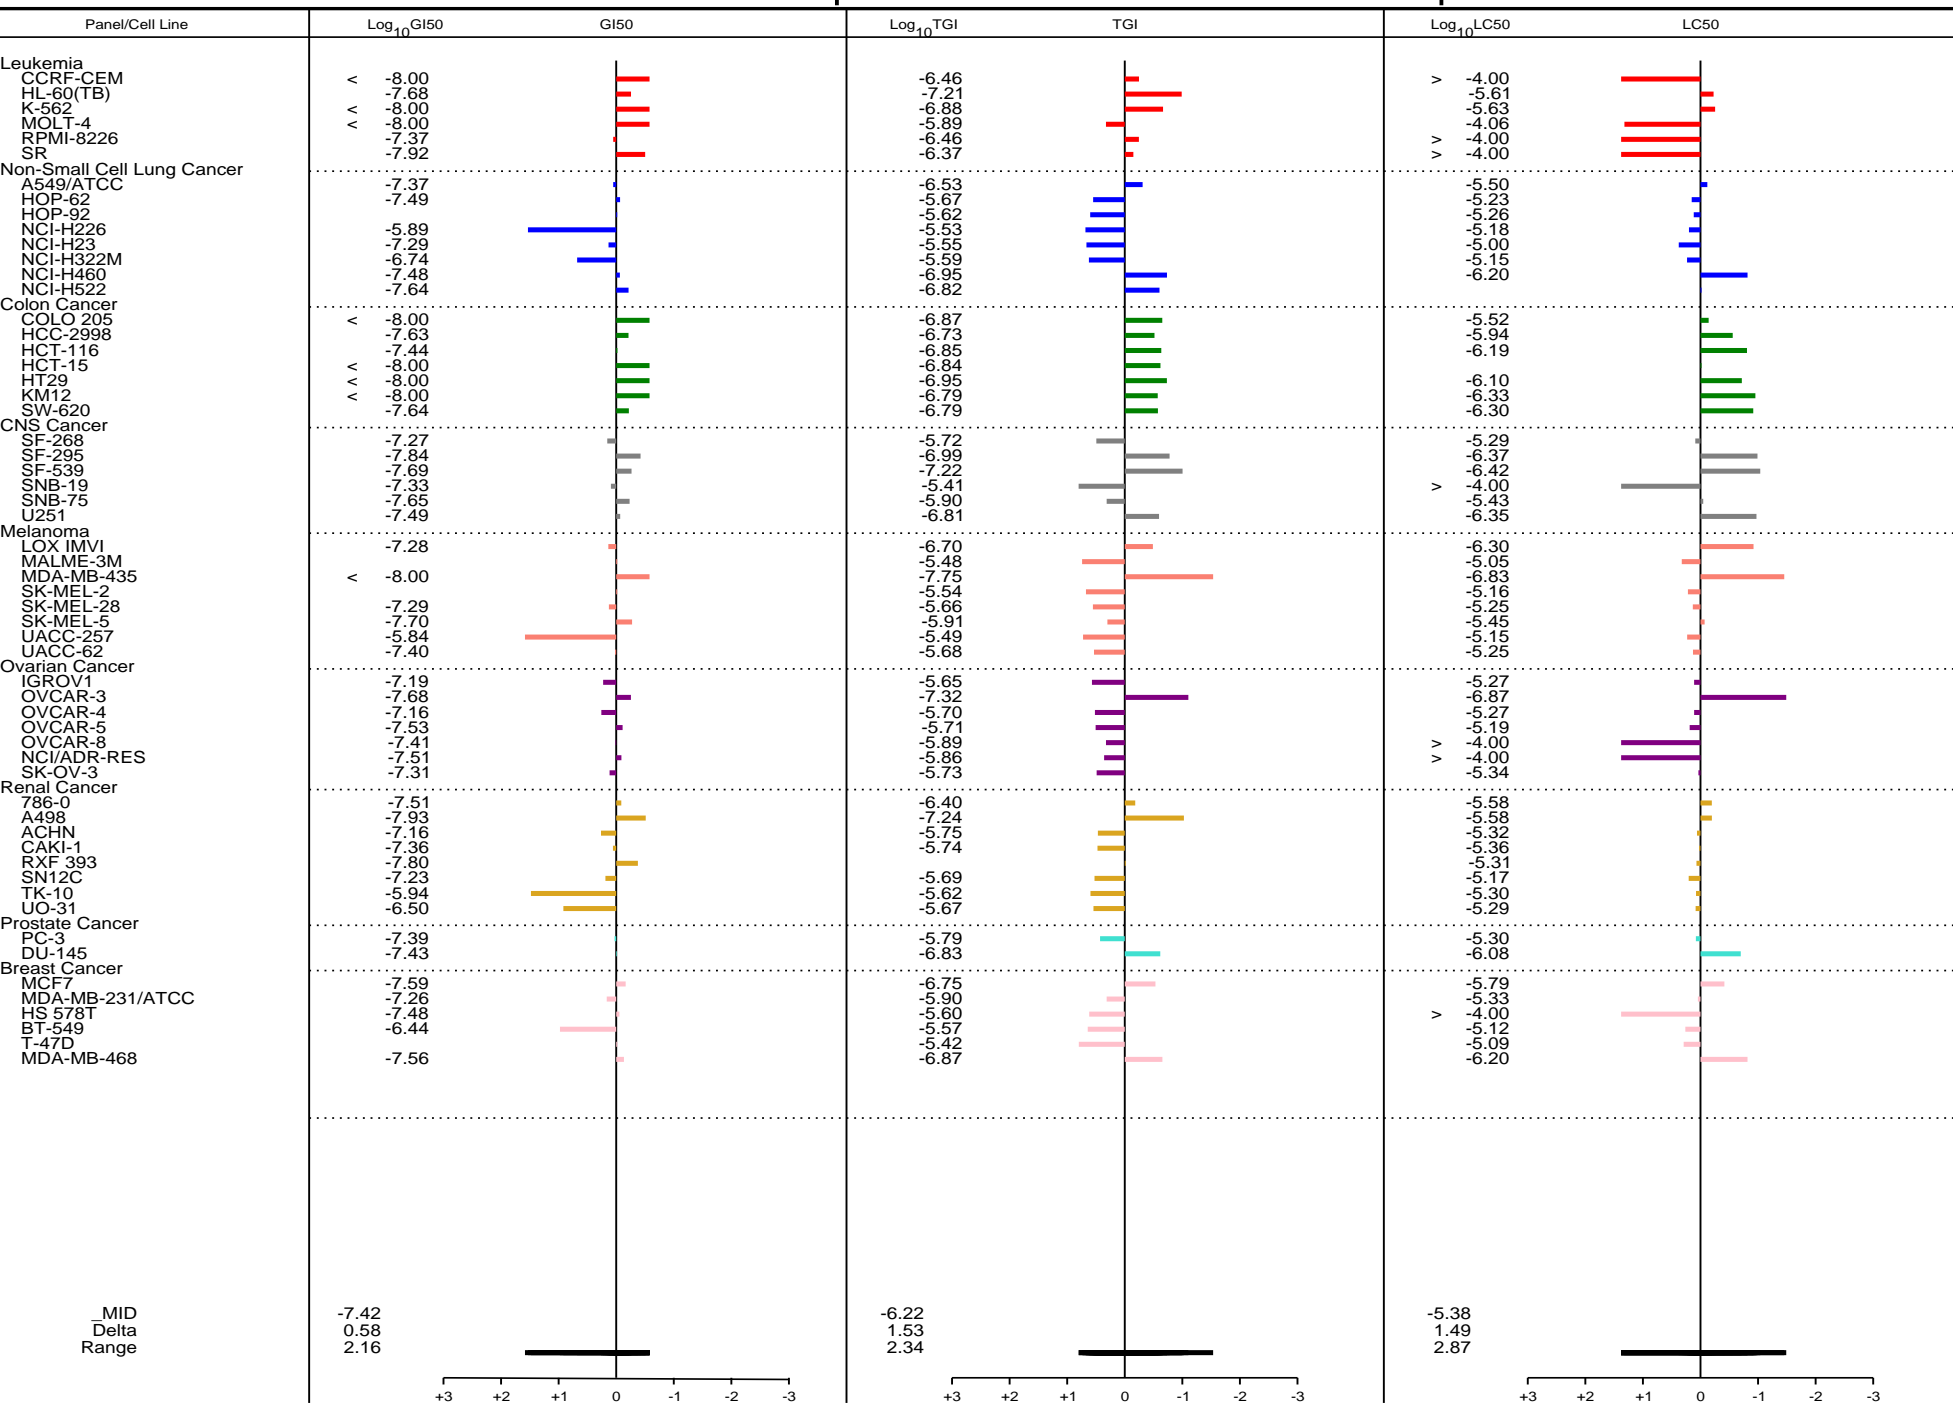

All Cell Lines

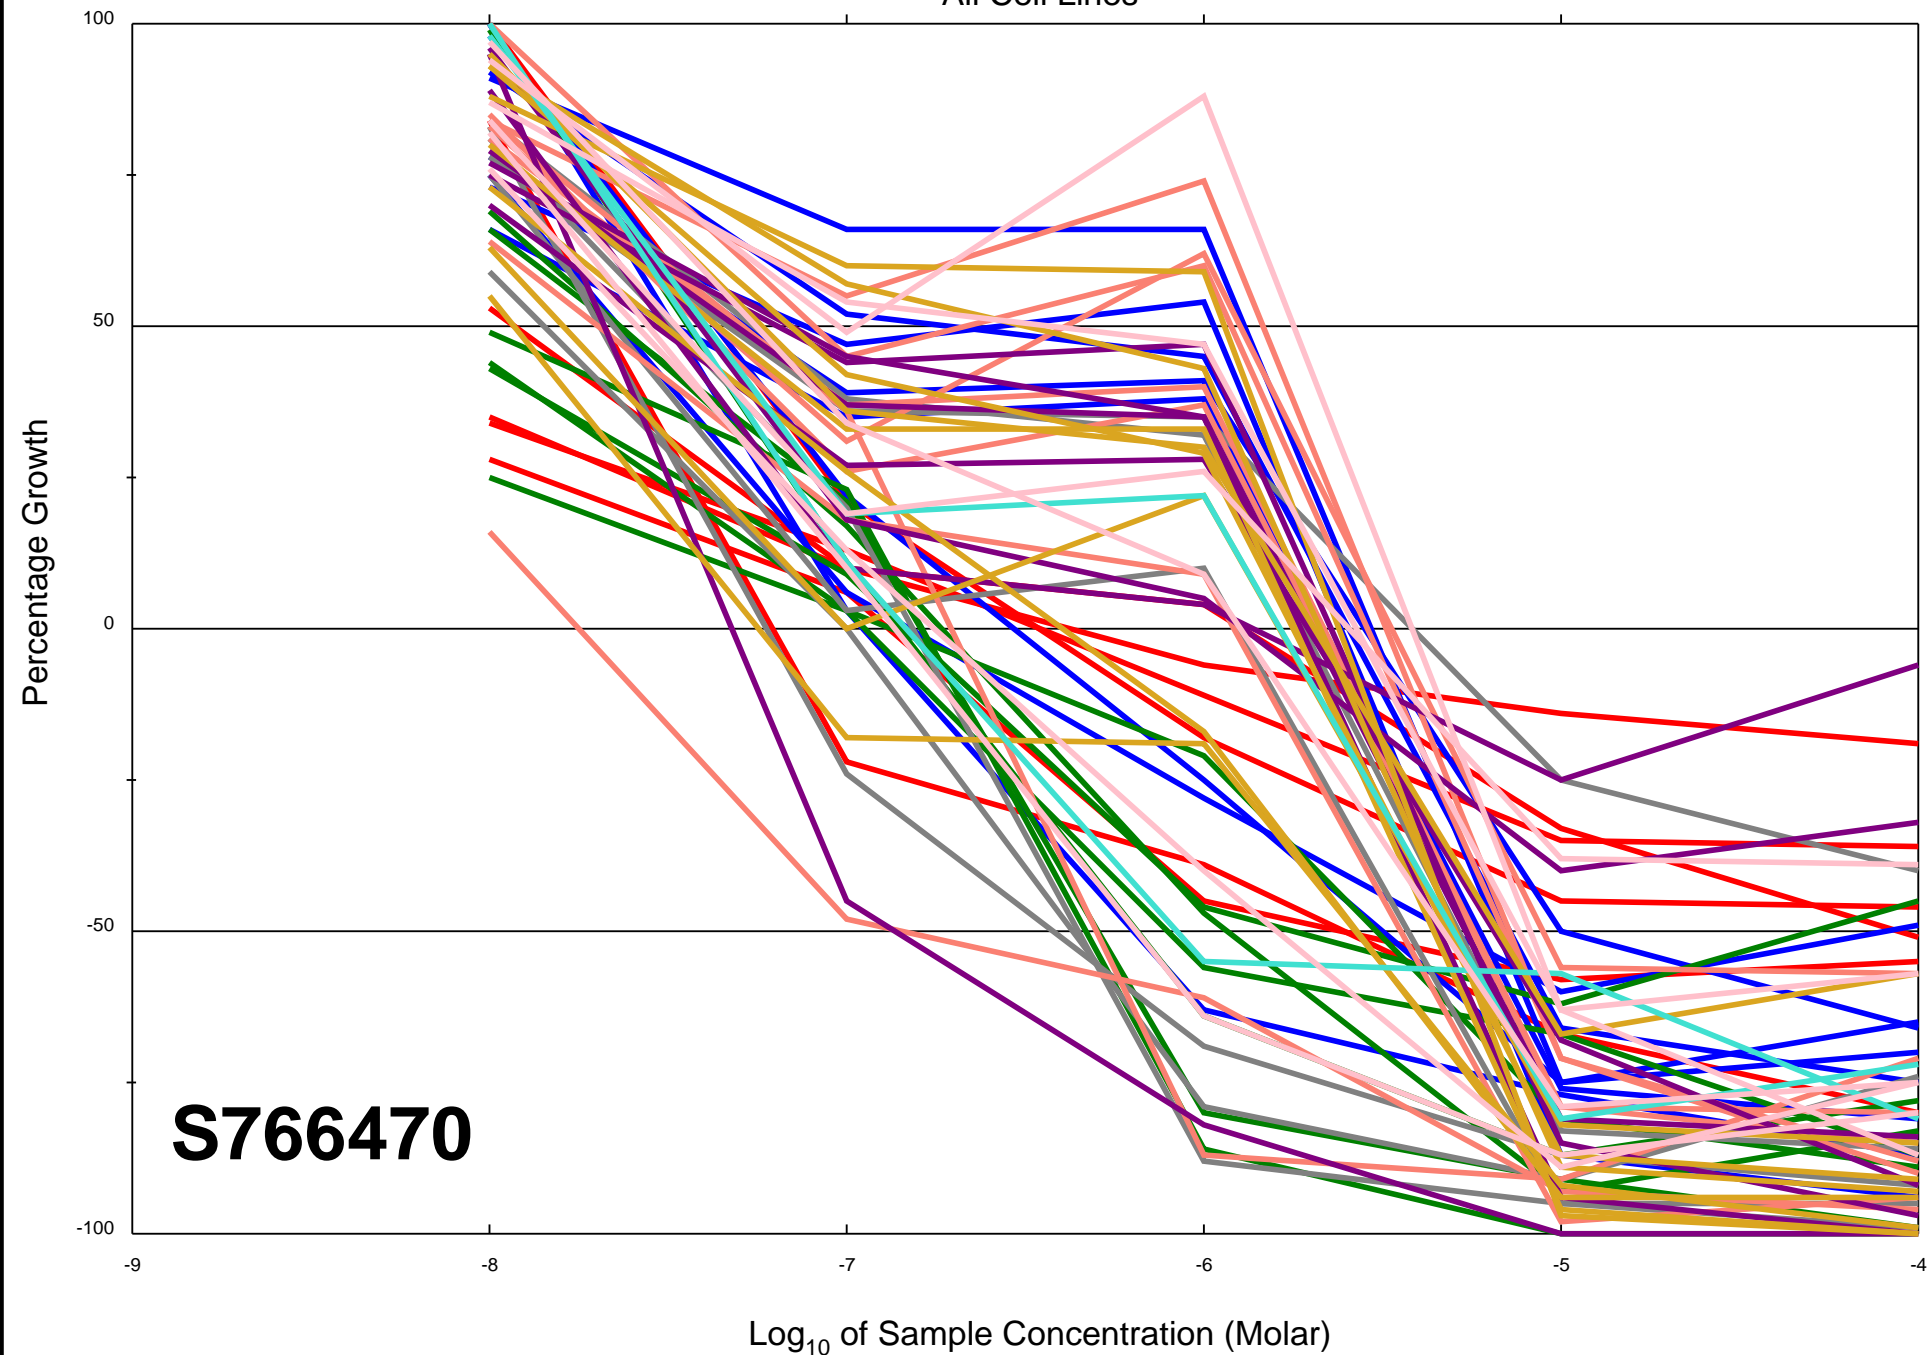

Leukemia

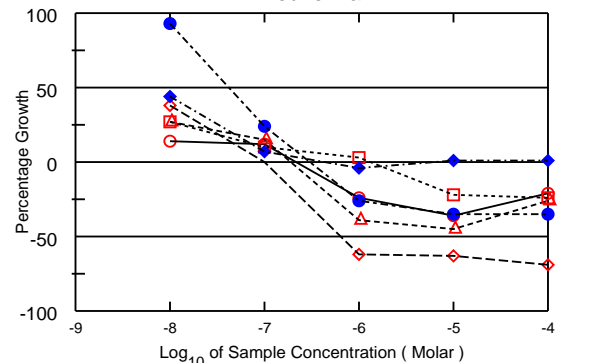

Non-Small Cell Lung Cancer

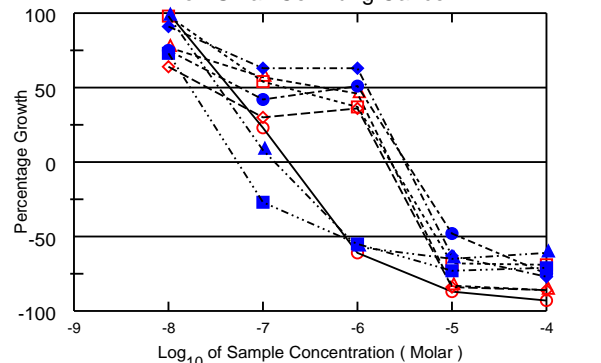

Colon Cancer

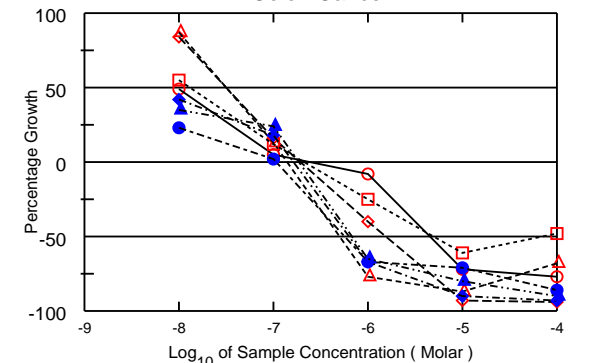

CNS Cancer

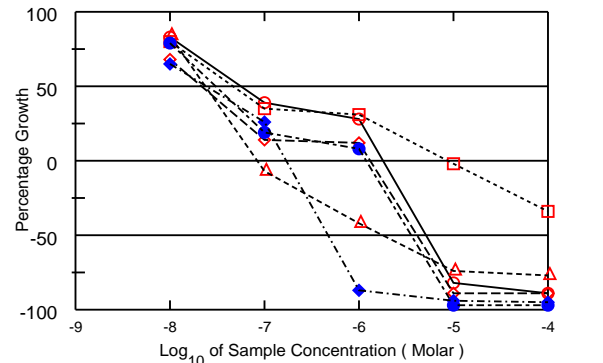

Melanoma

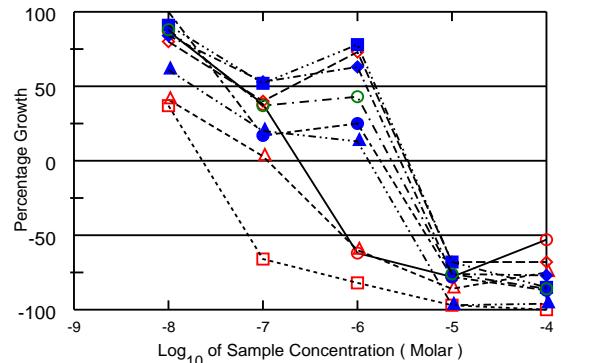

Ovarian Cancer

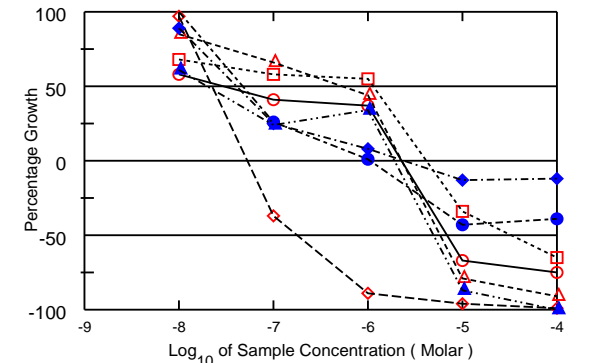

Renal Cancer

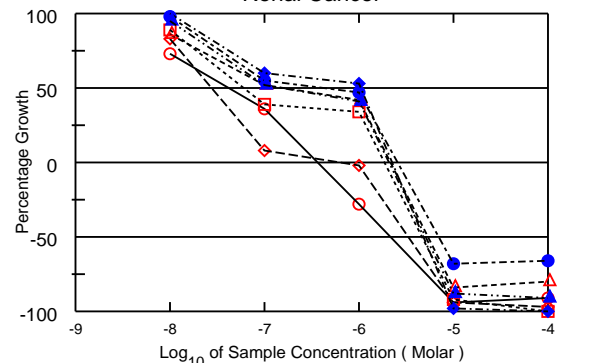

Prostate Cancer

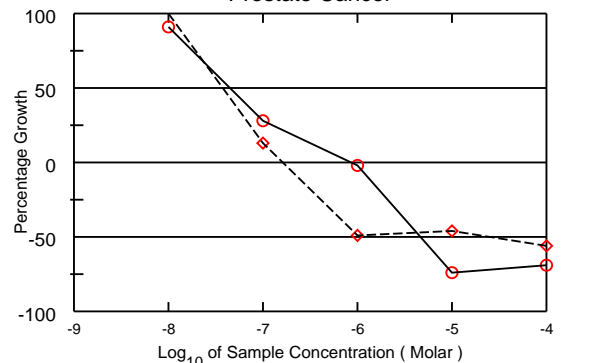

Breast Cancer

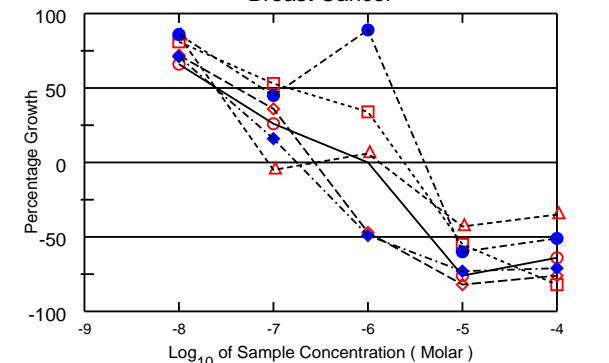

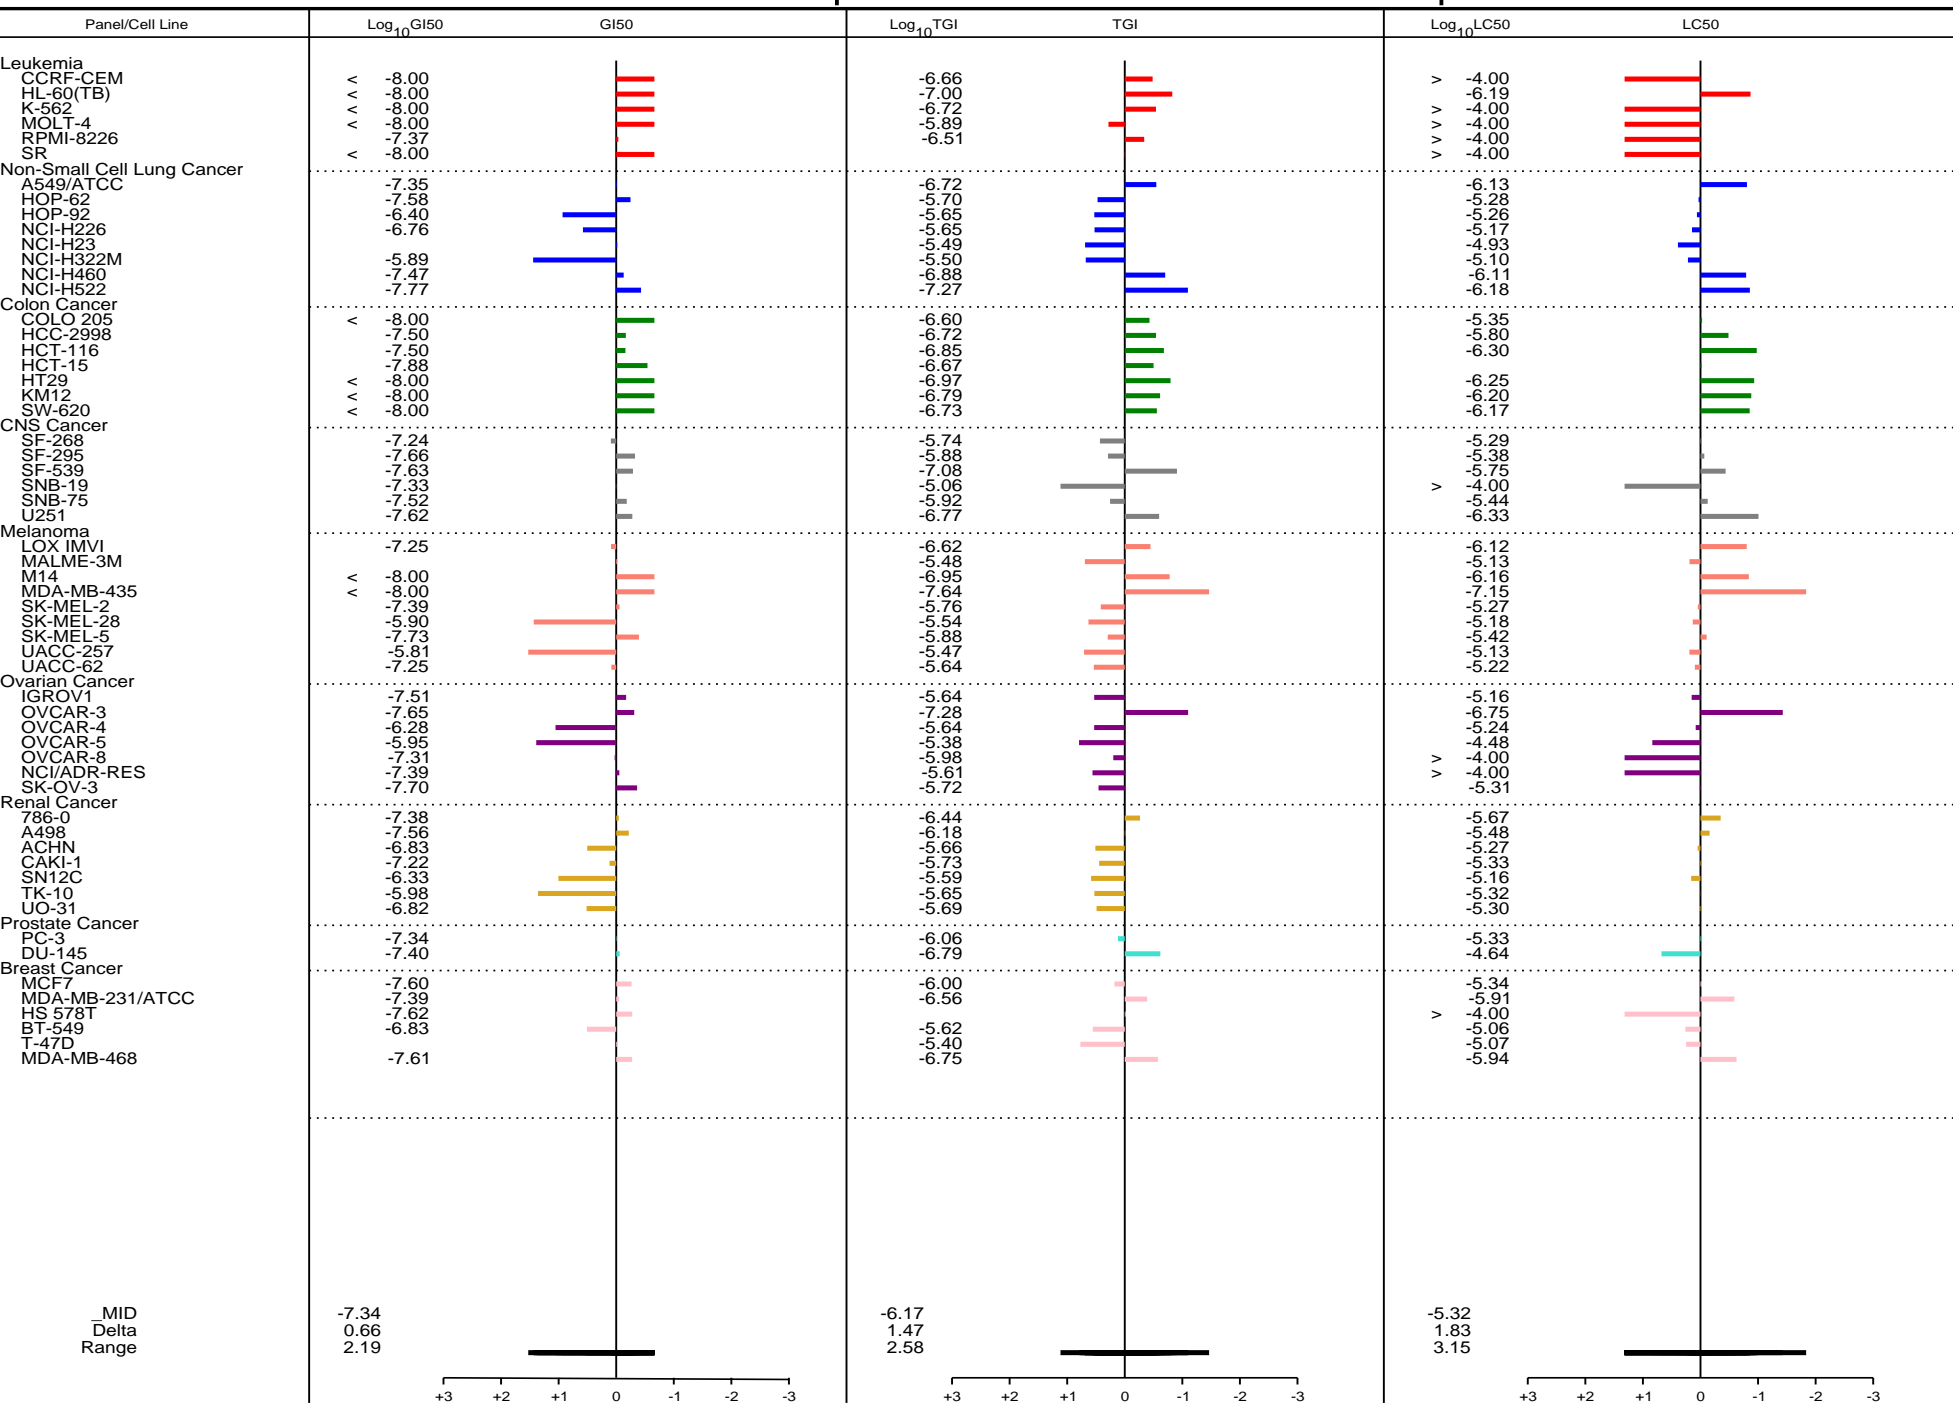

All Cell Lines

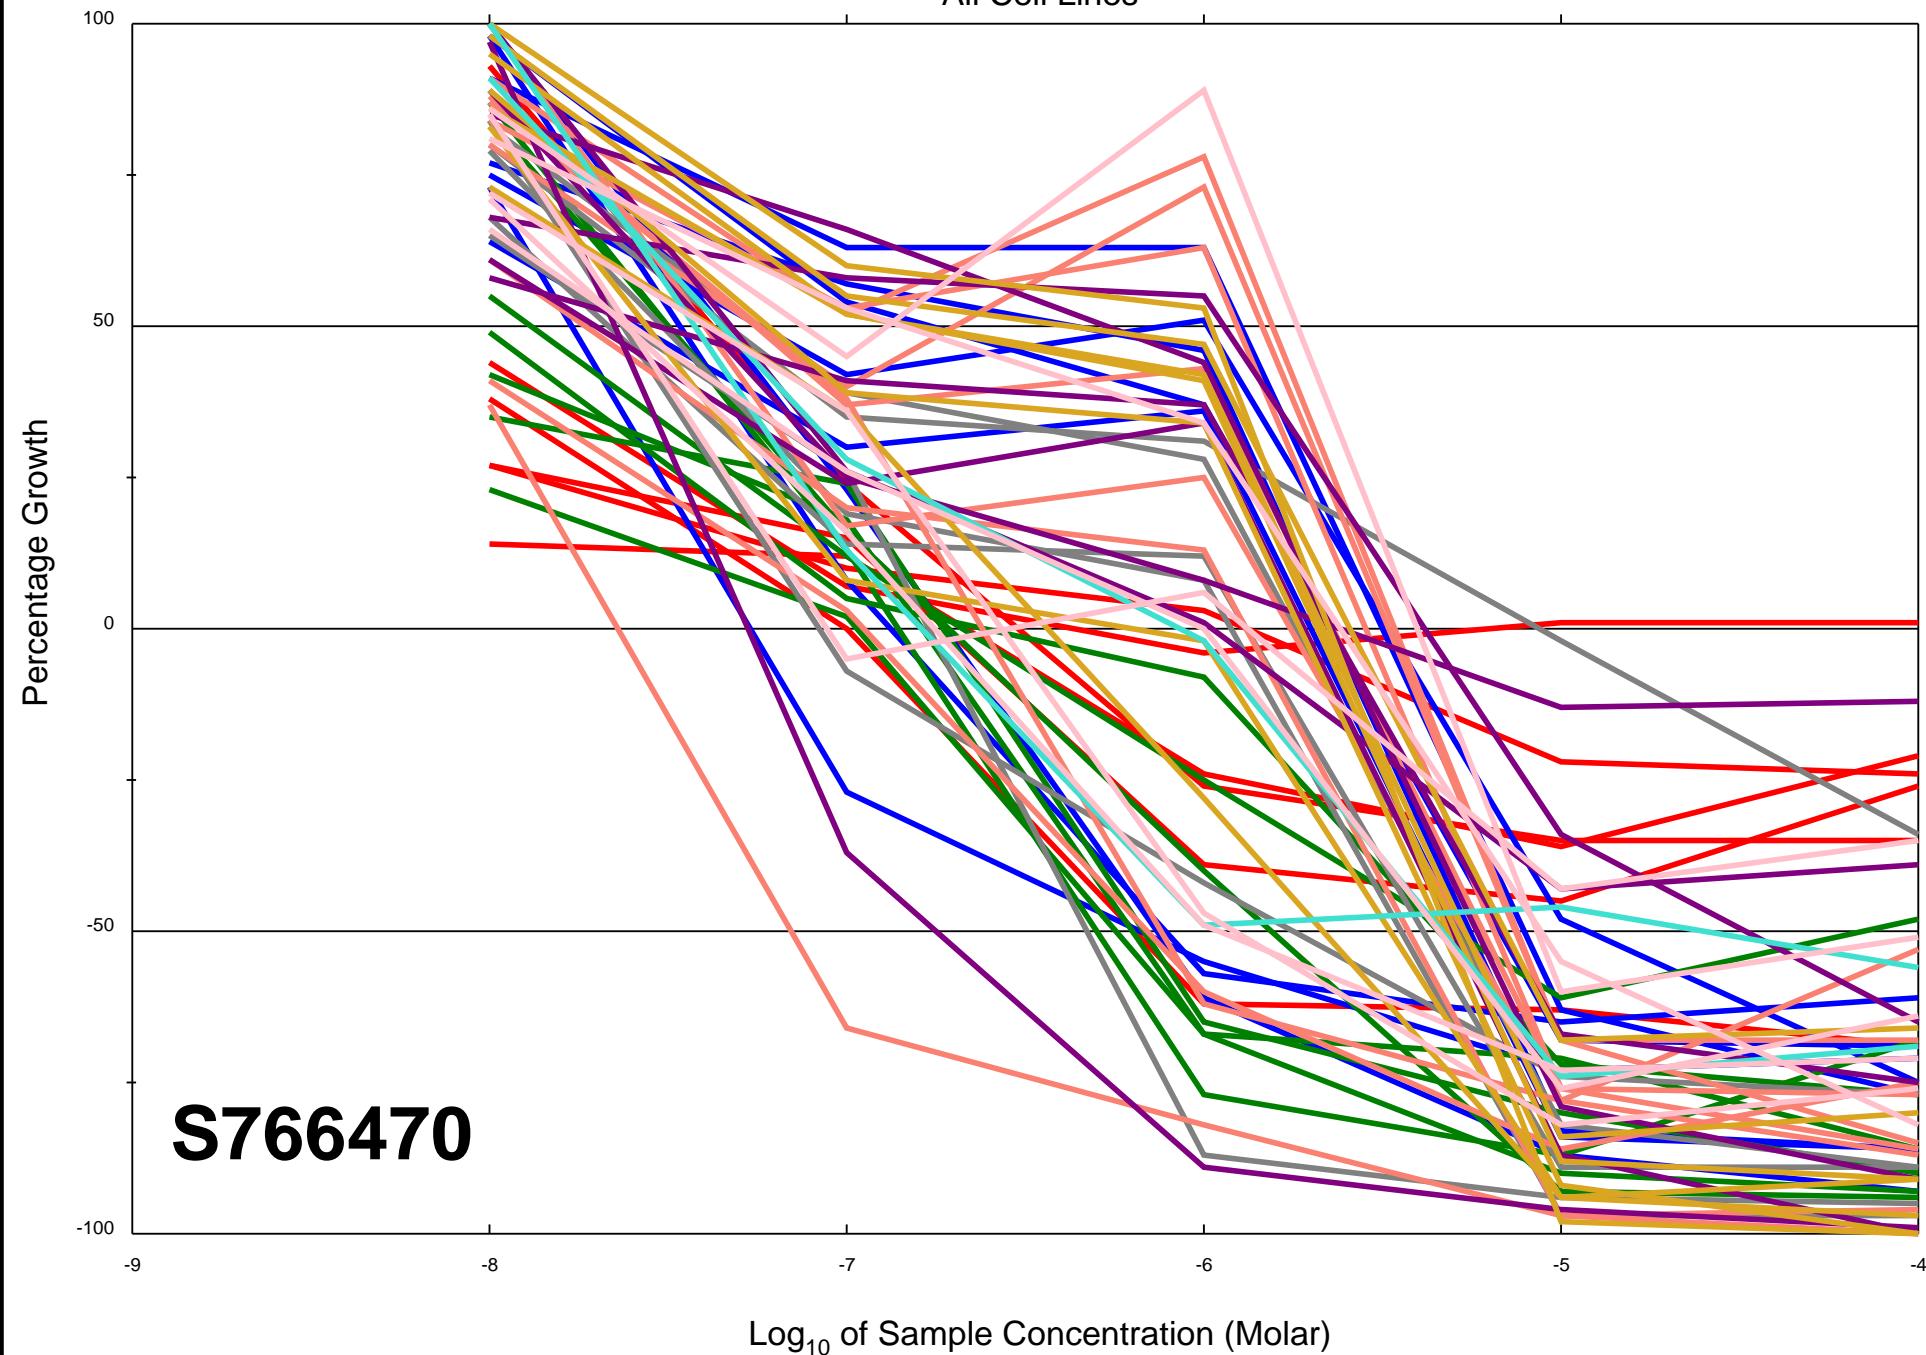

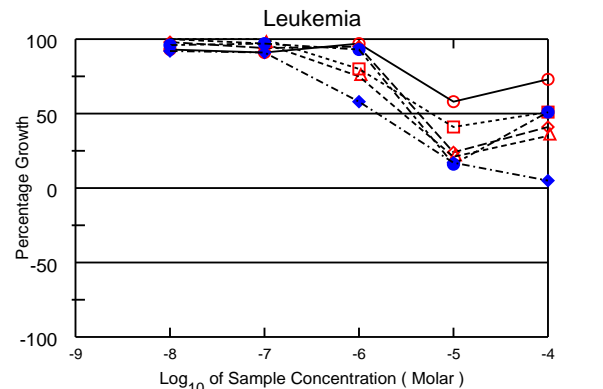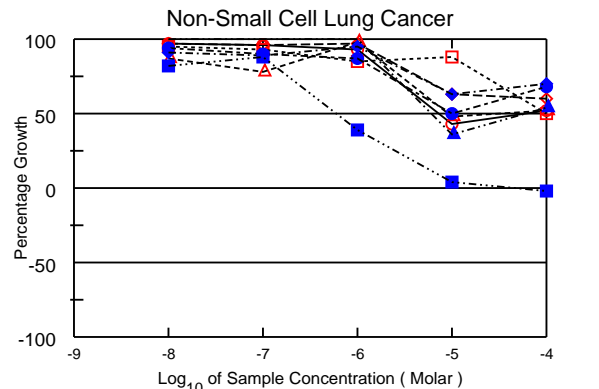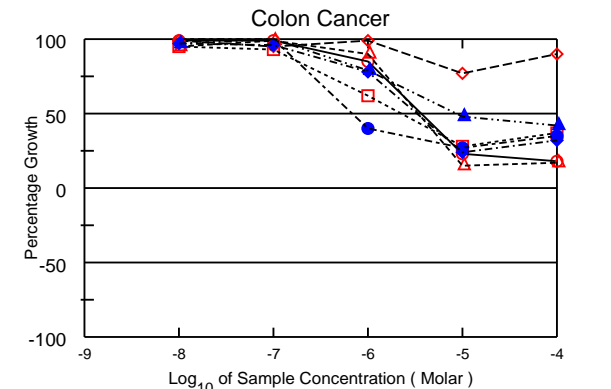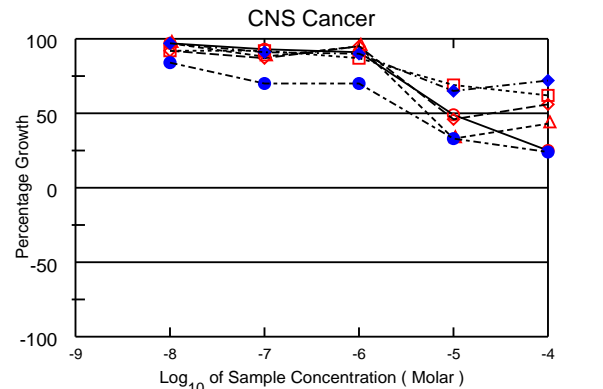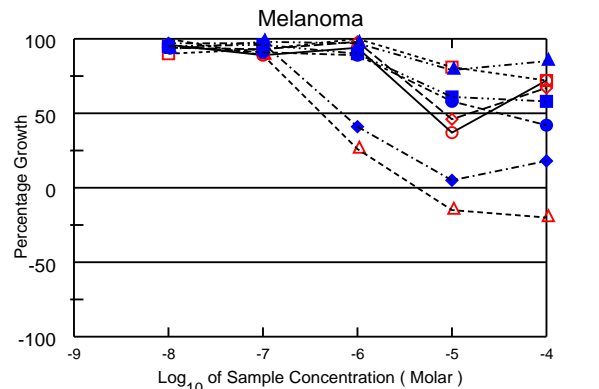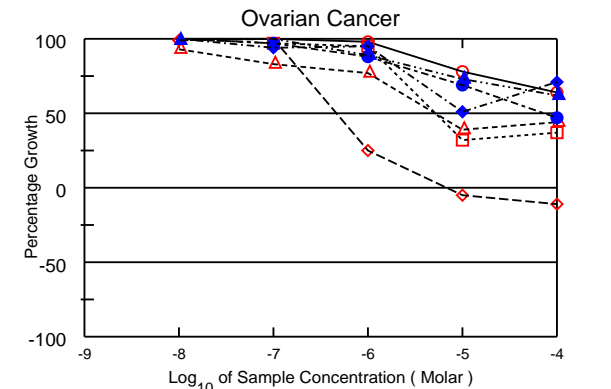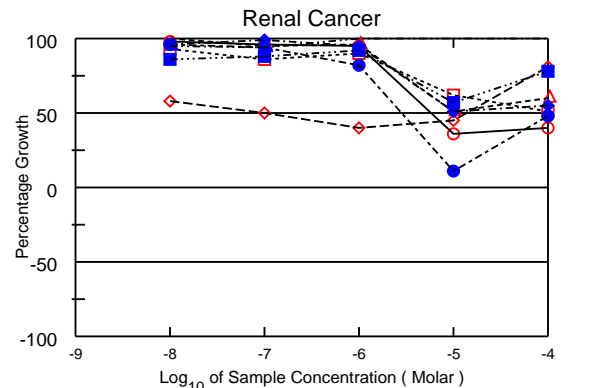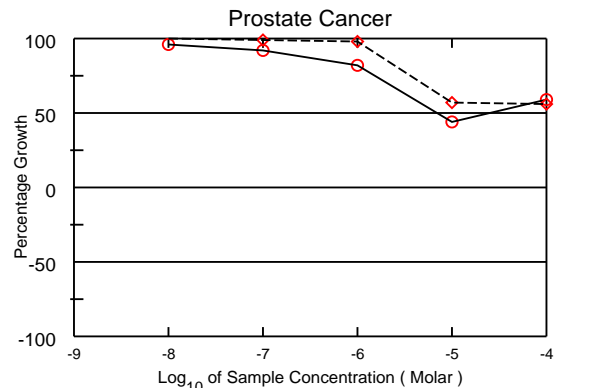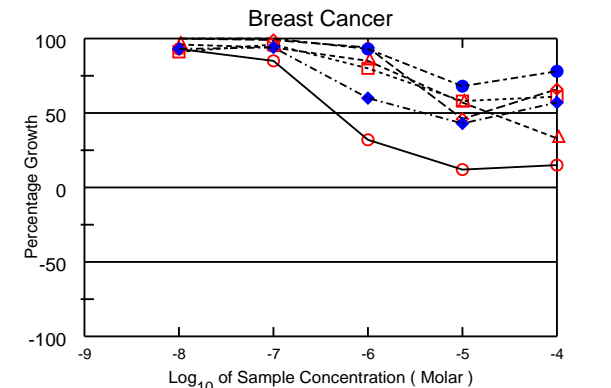



All Cell Lines

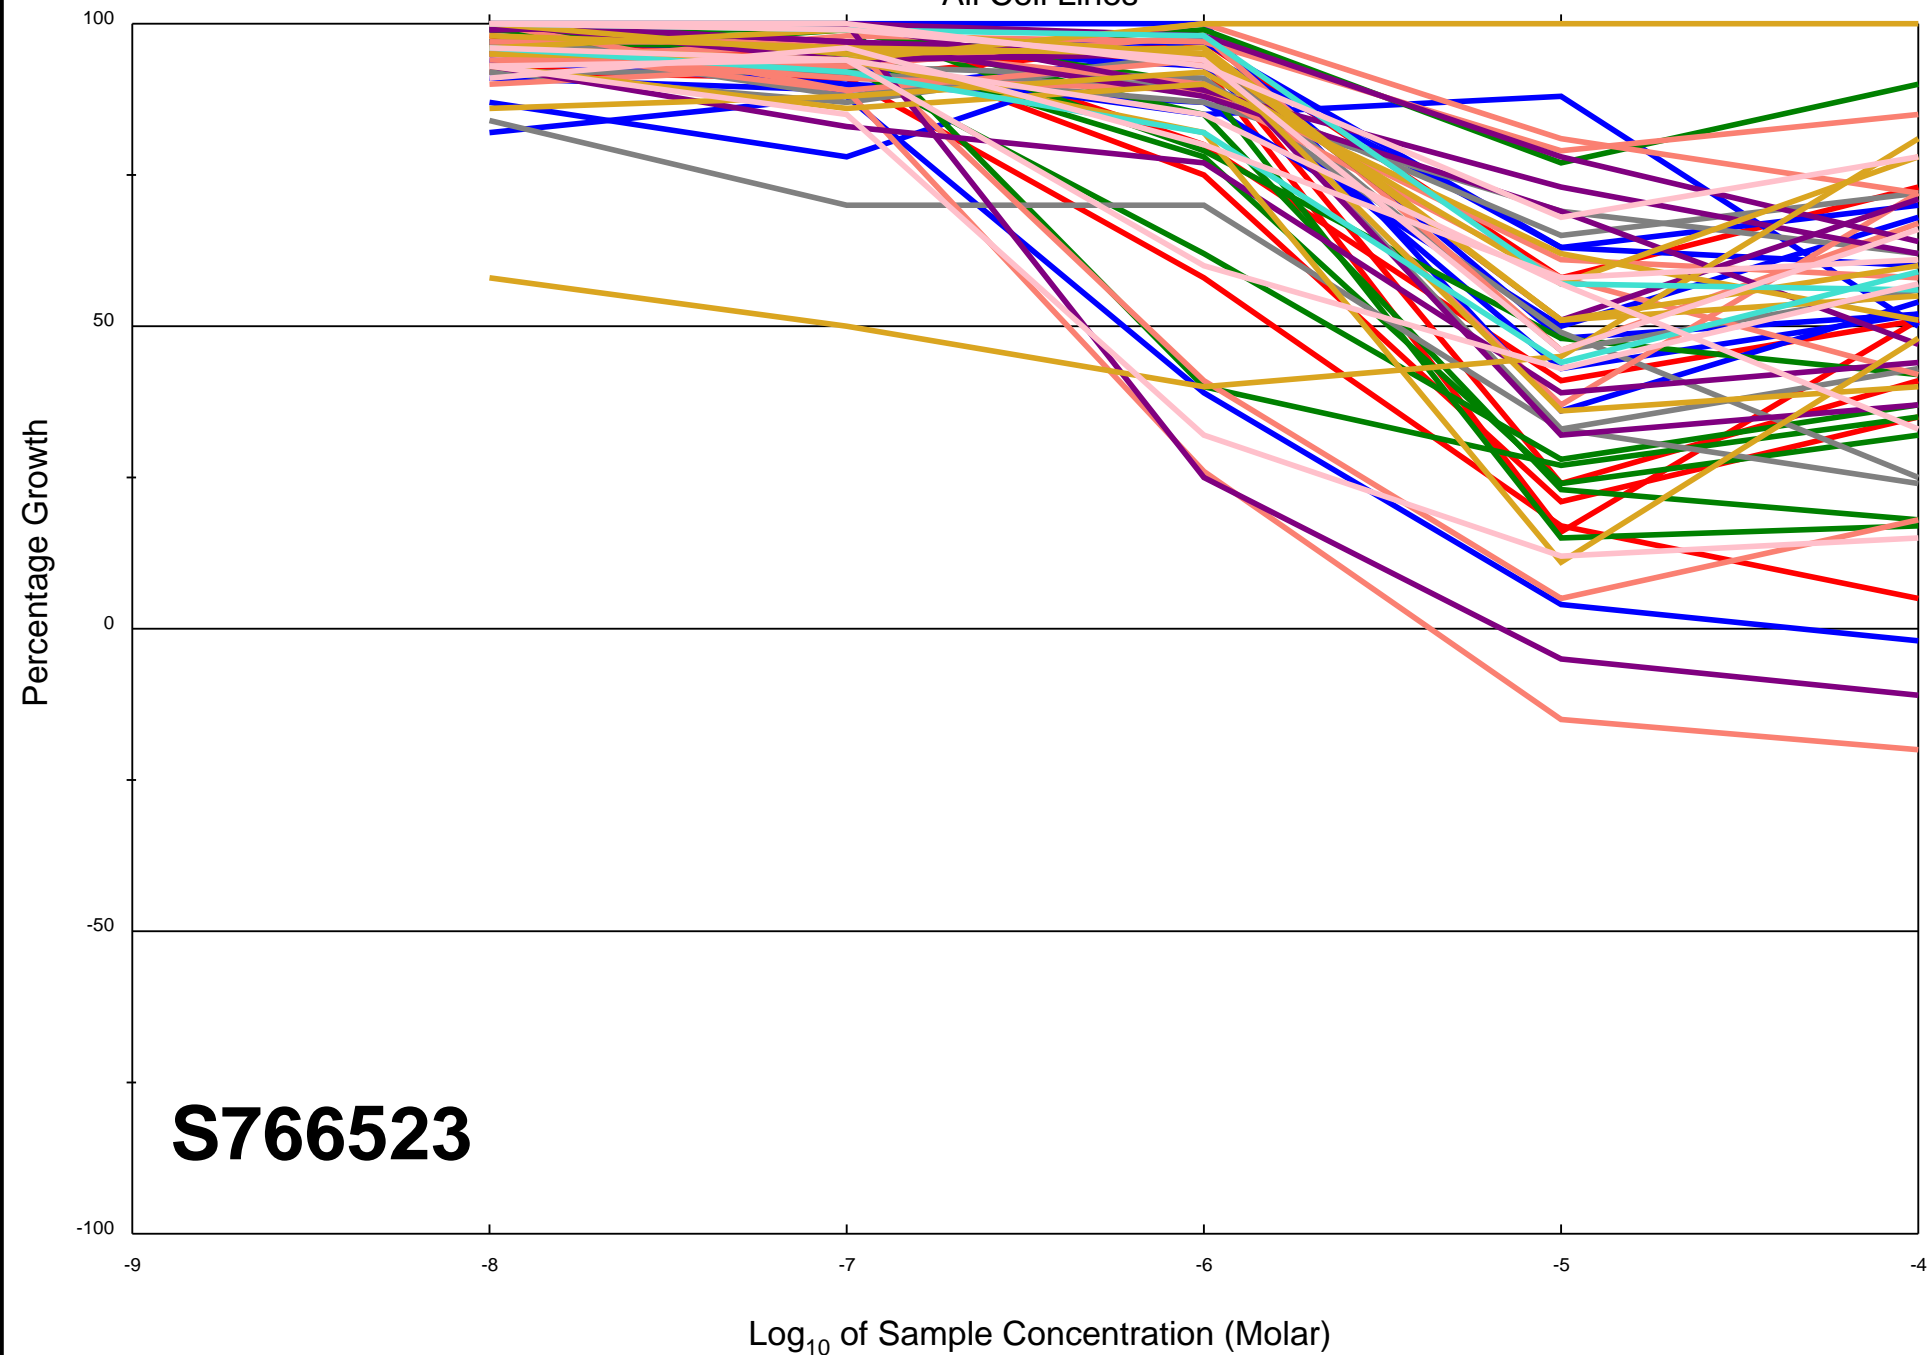

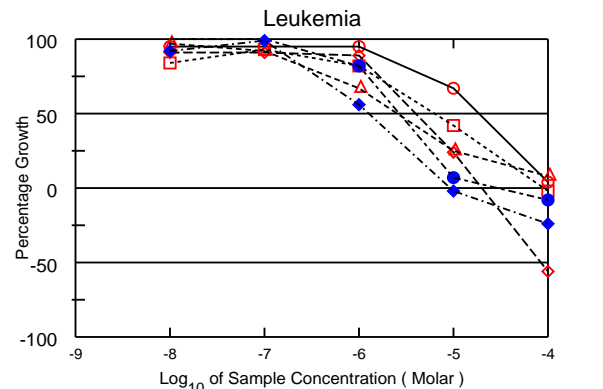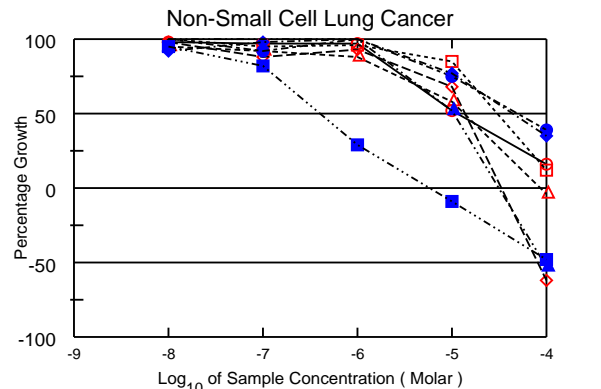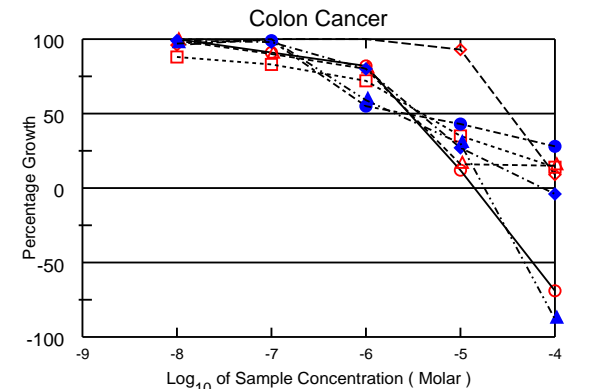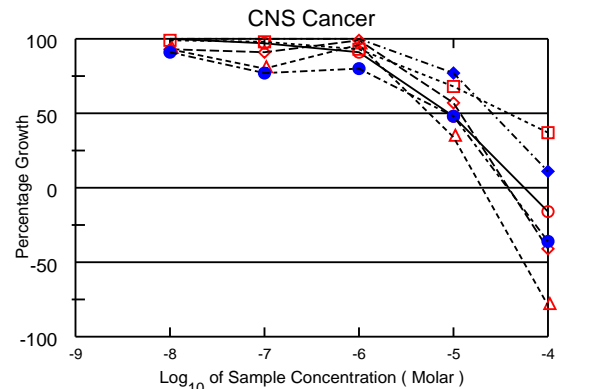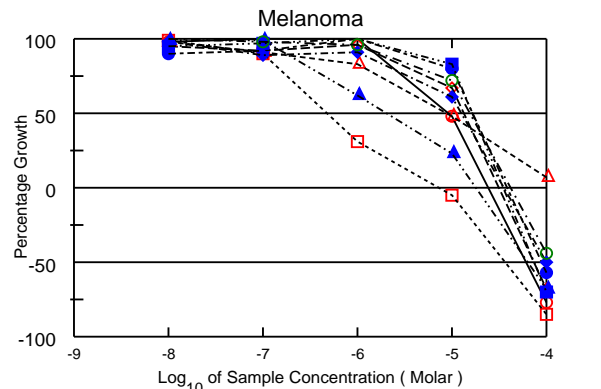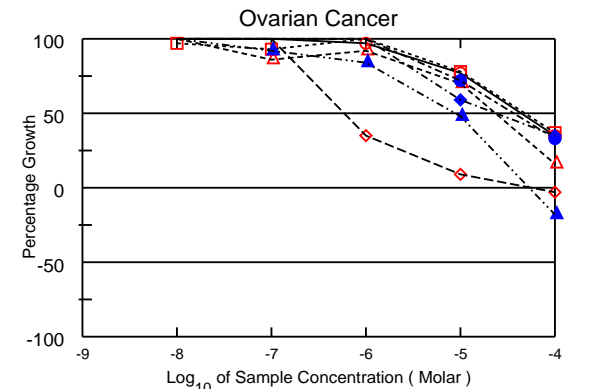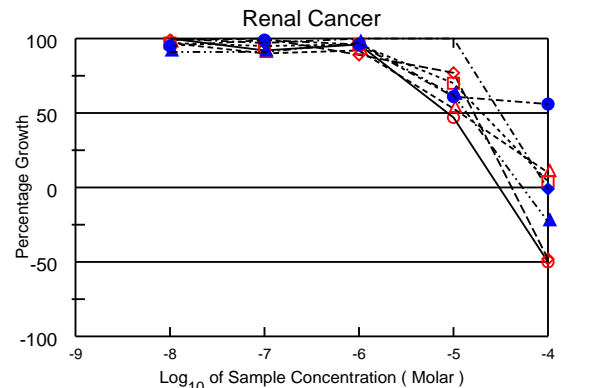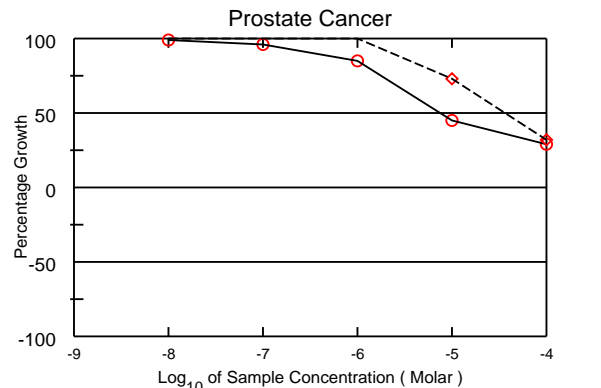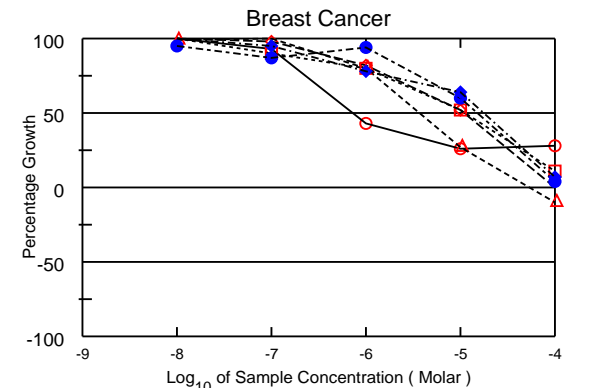

Mean Graphs

Report Date :July 13, 2015

Test Date :February 03, 2014

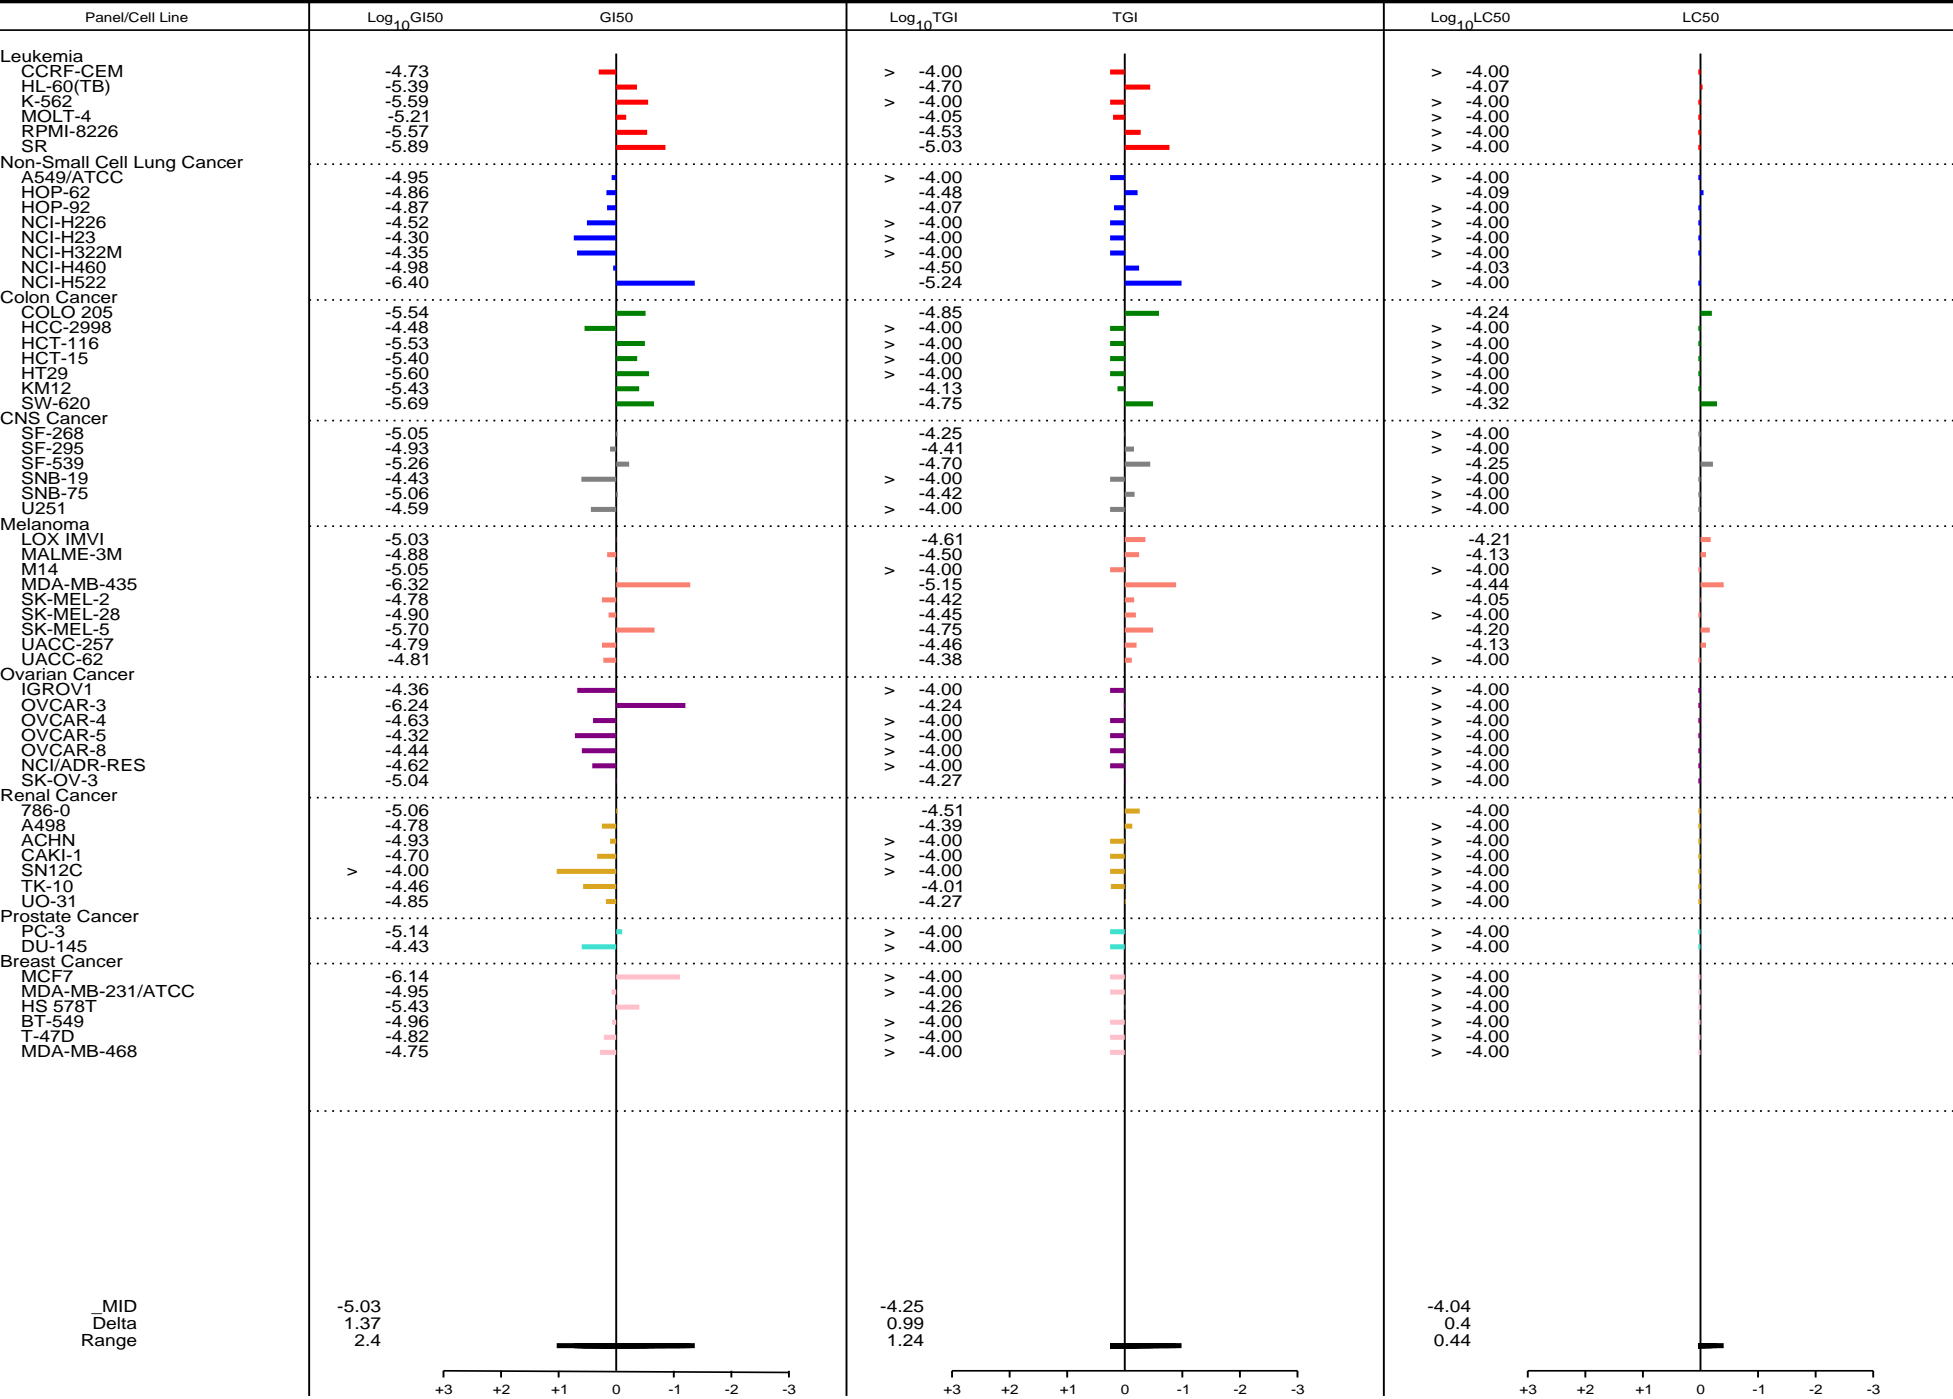

## Dose Response Curves

Report Date: July 13, 2015

Test Date: February 03, 2014

## All Cell Lines

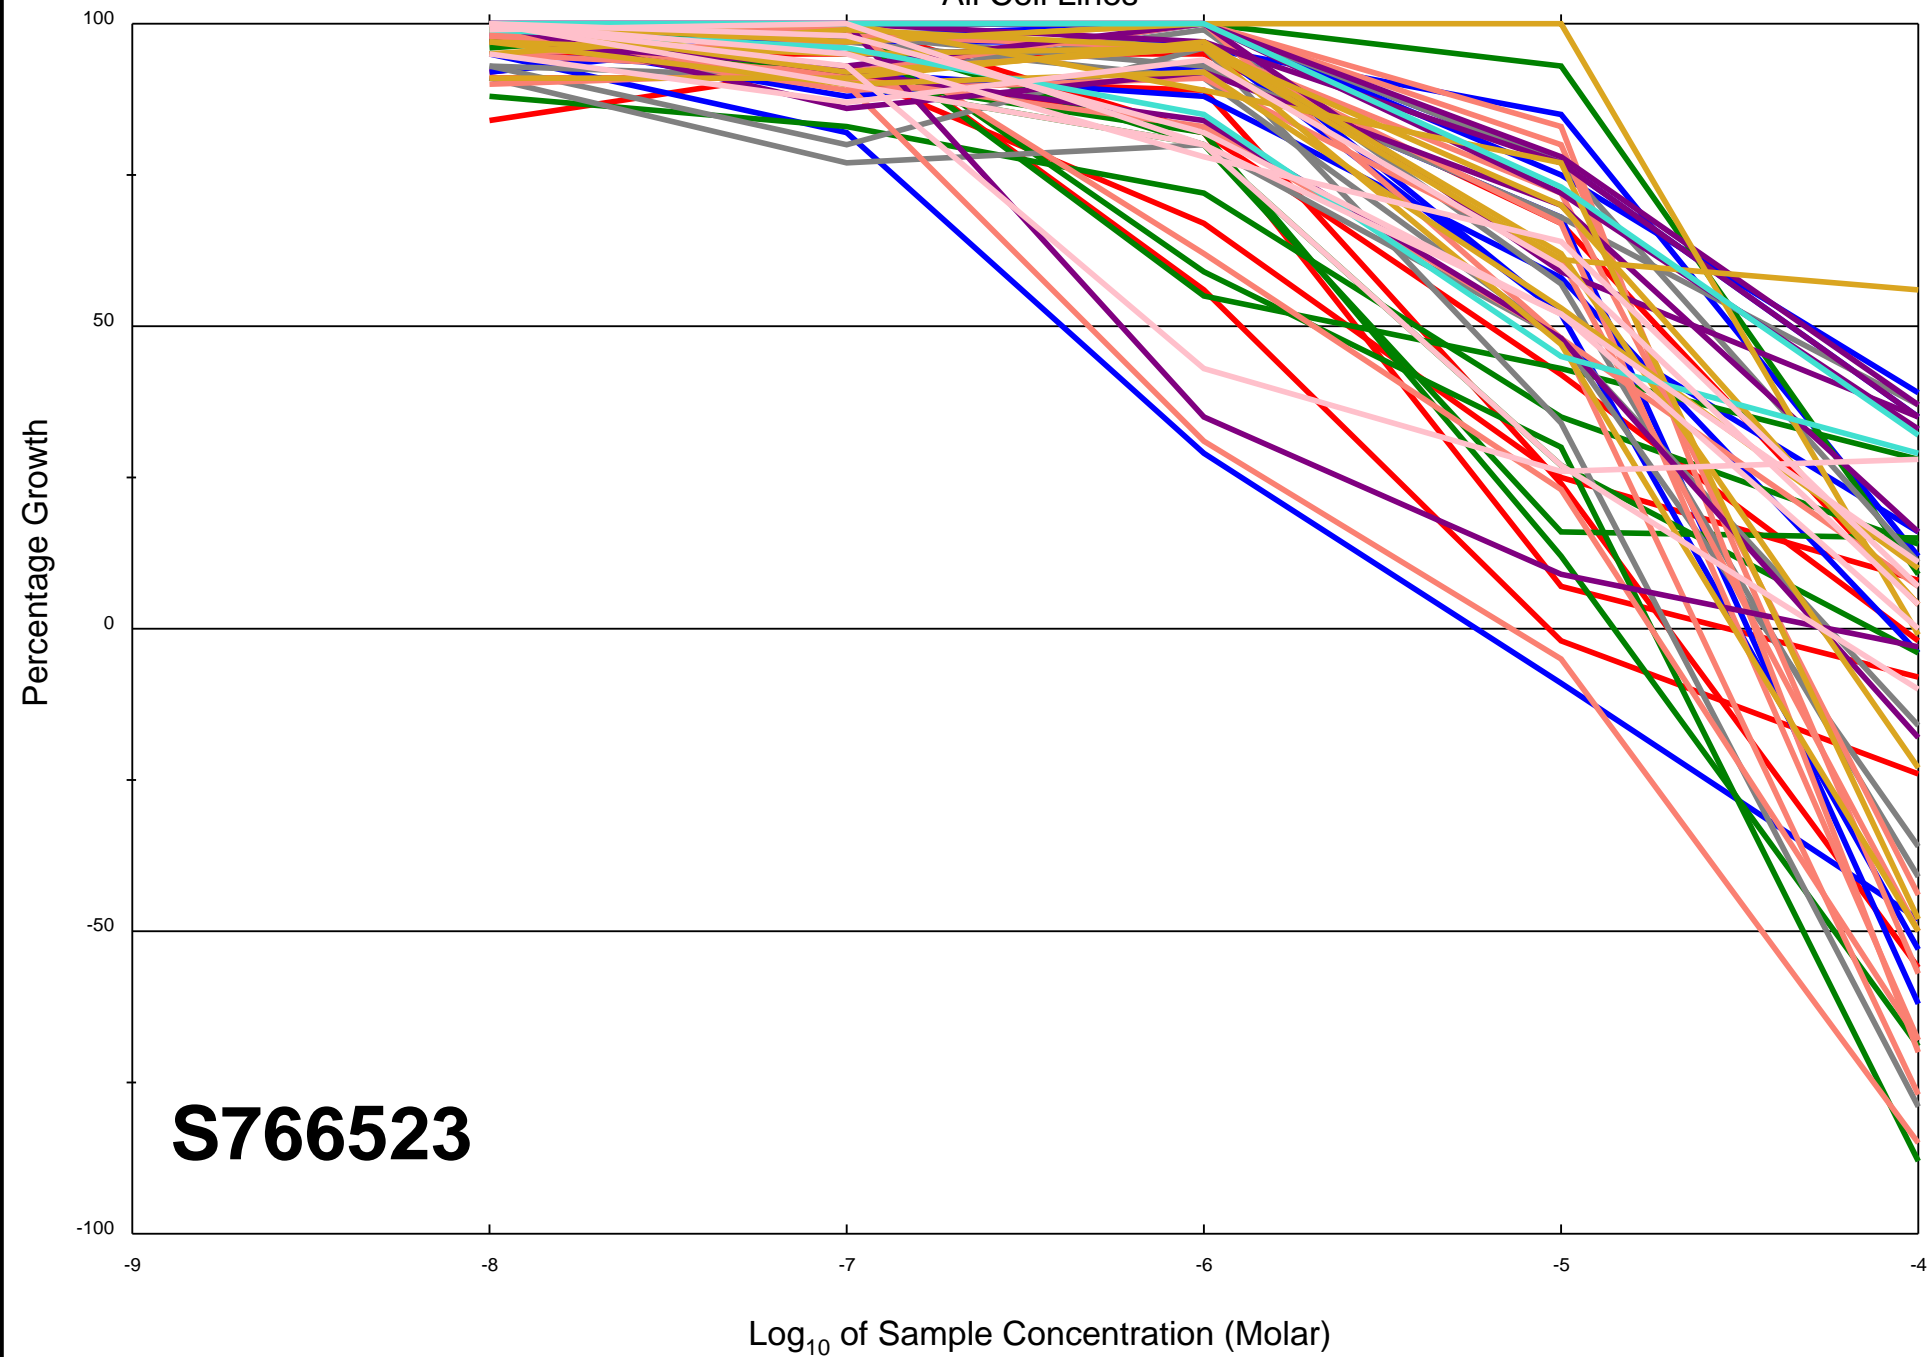

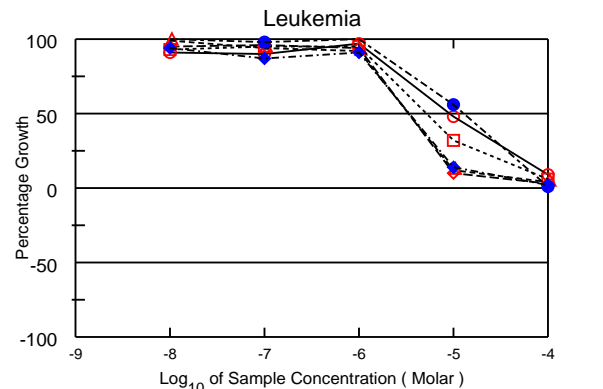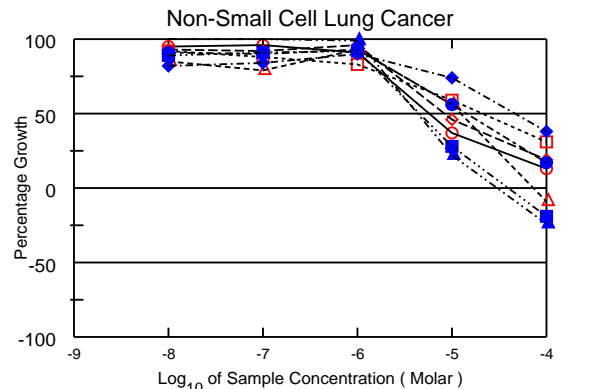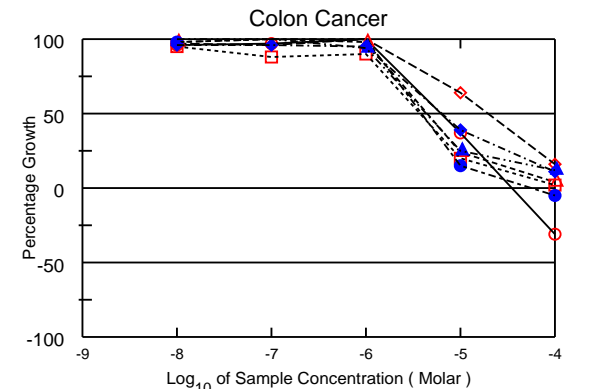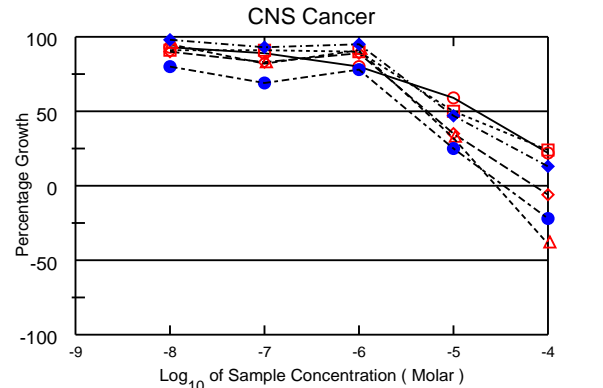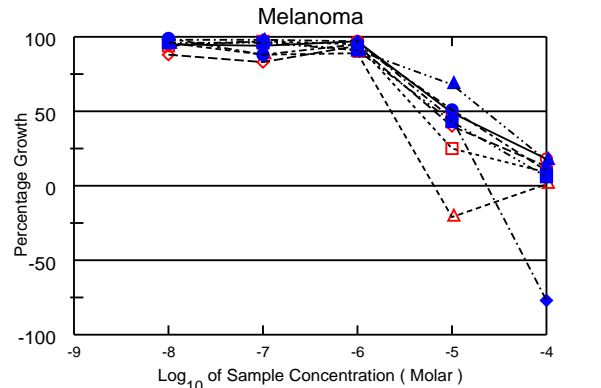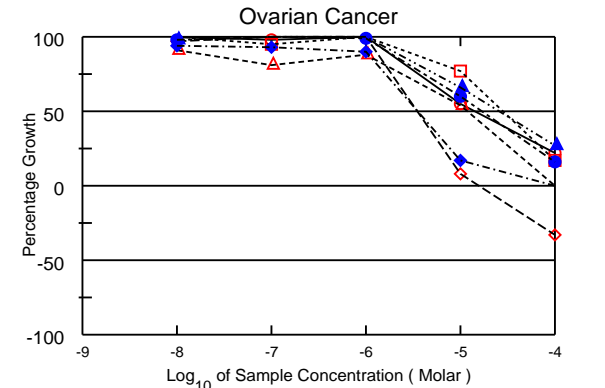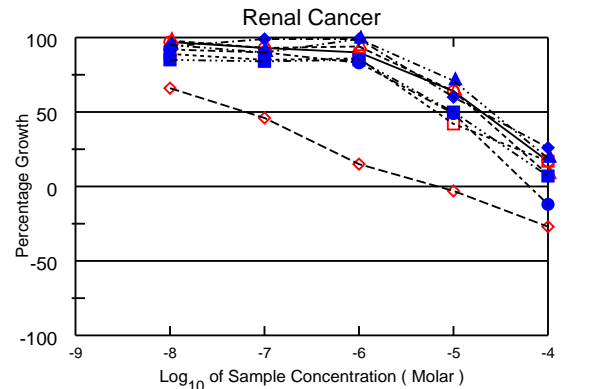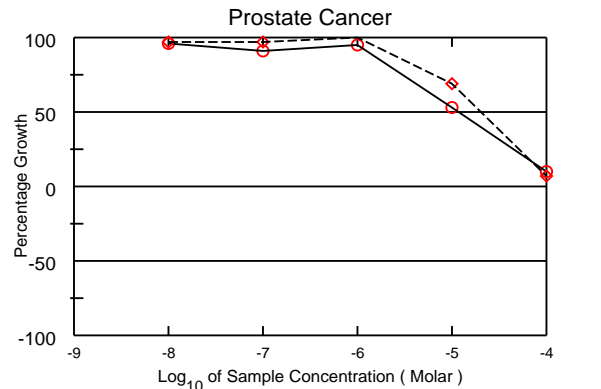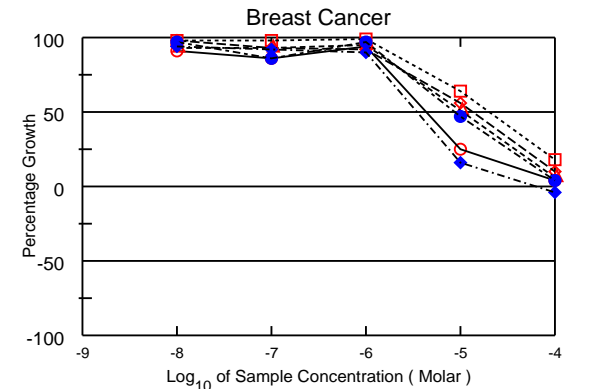

Mean Graphs

Report Date :July 13, 2015

Test Date :October 28, 2013

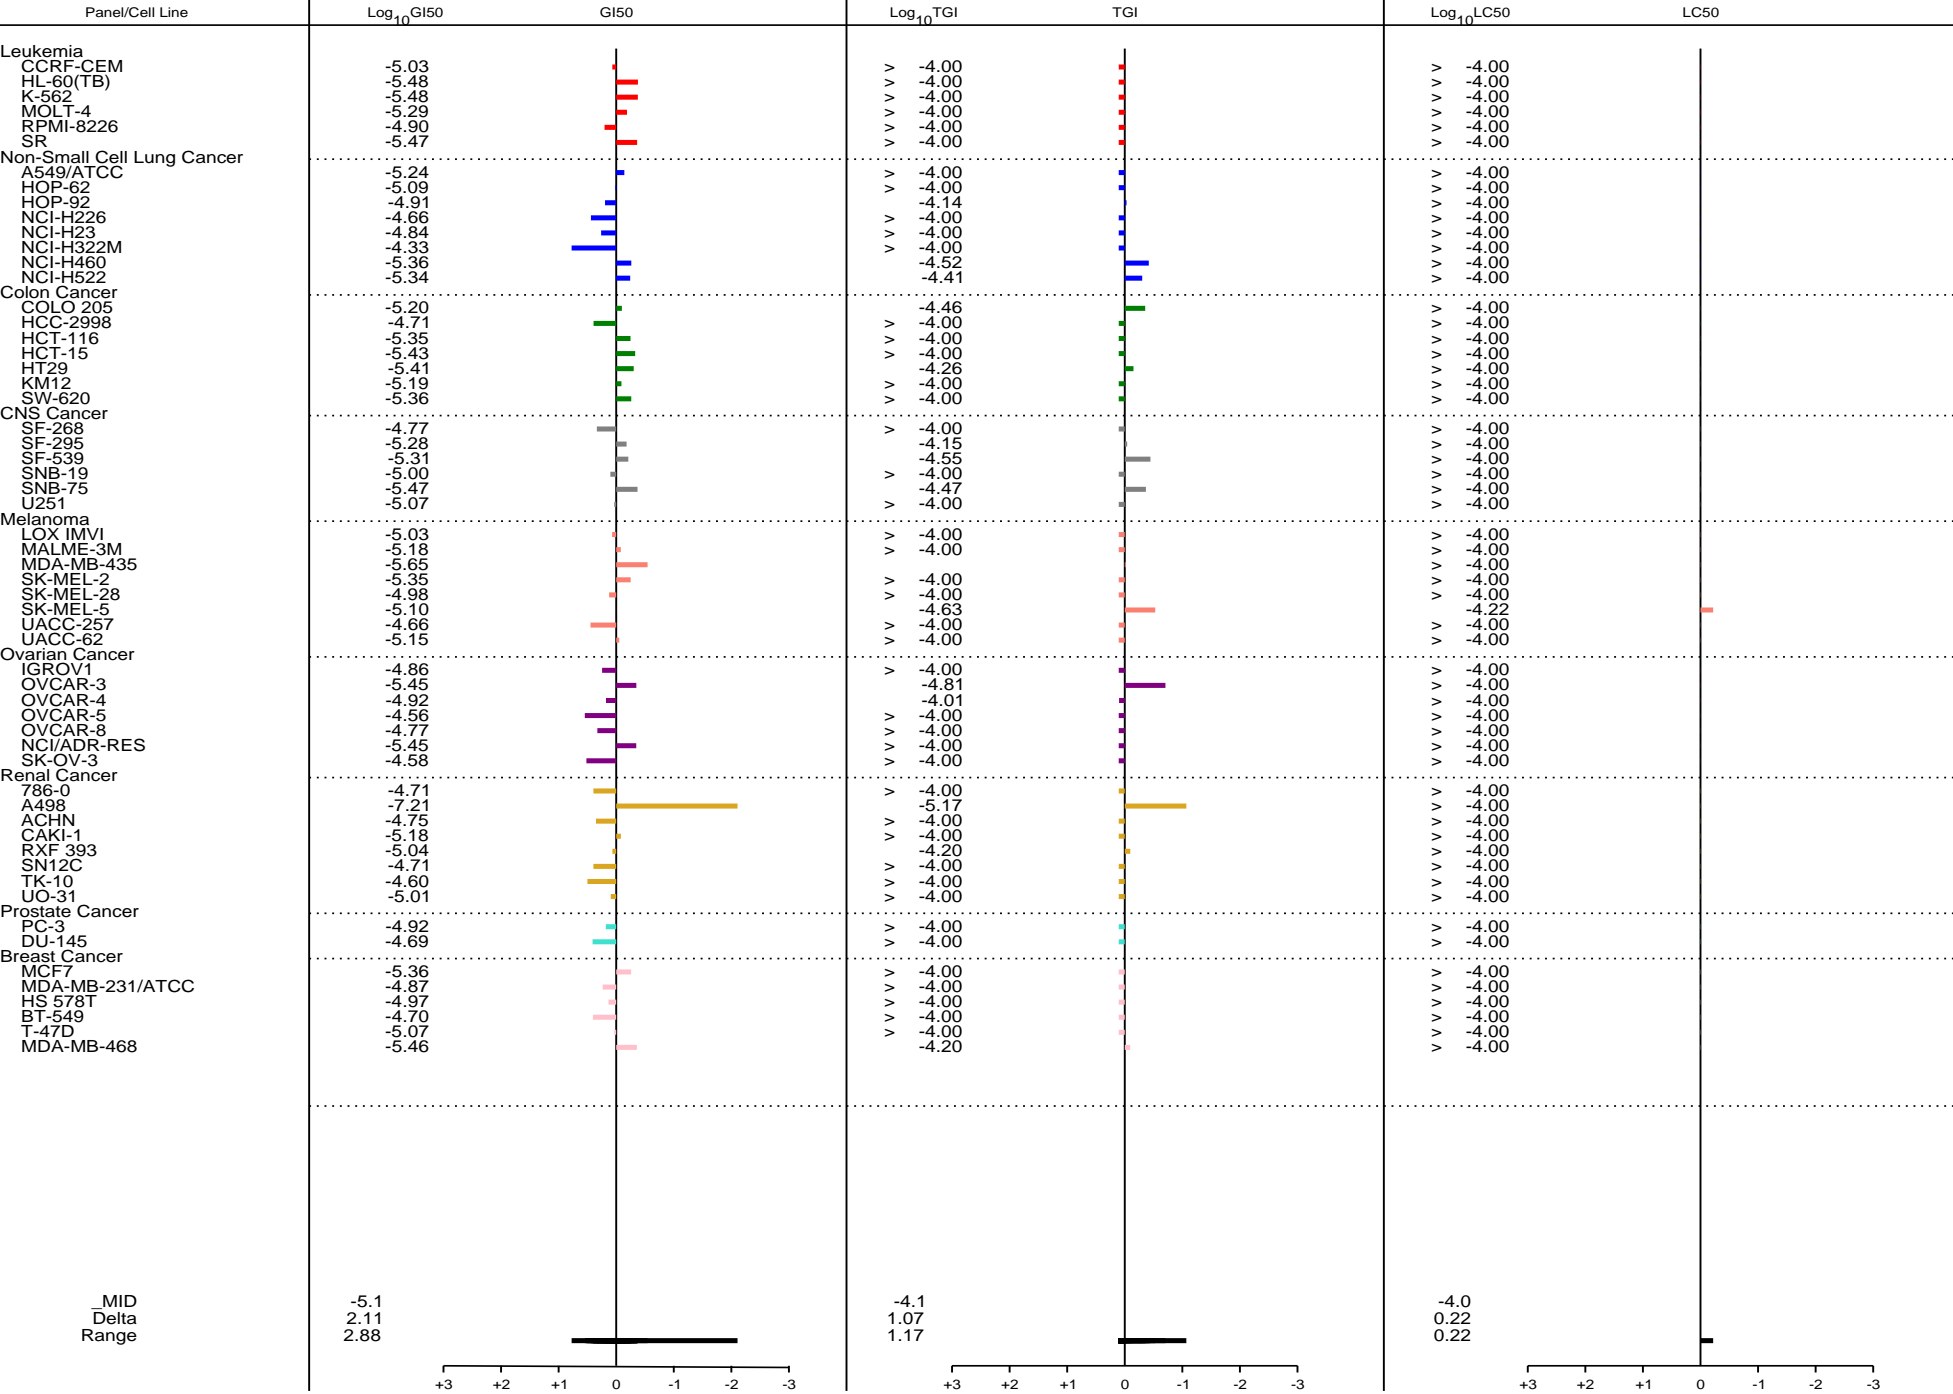

All Cell Lines

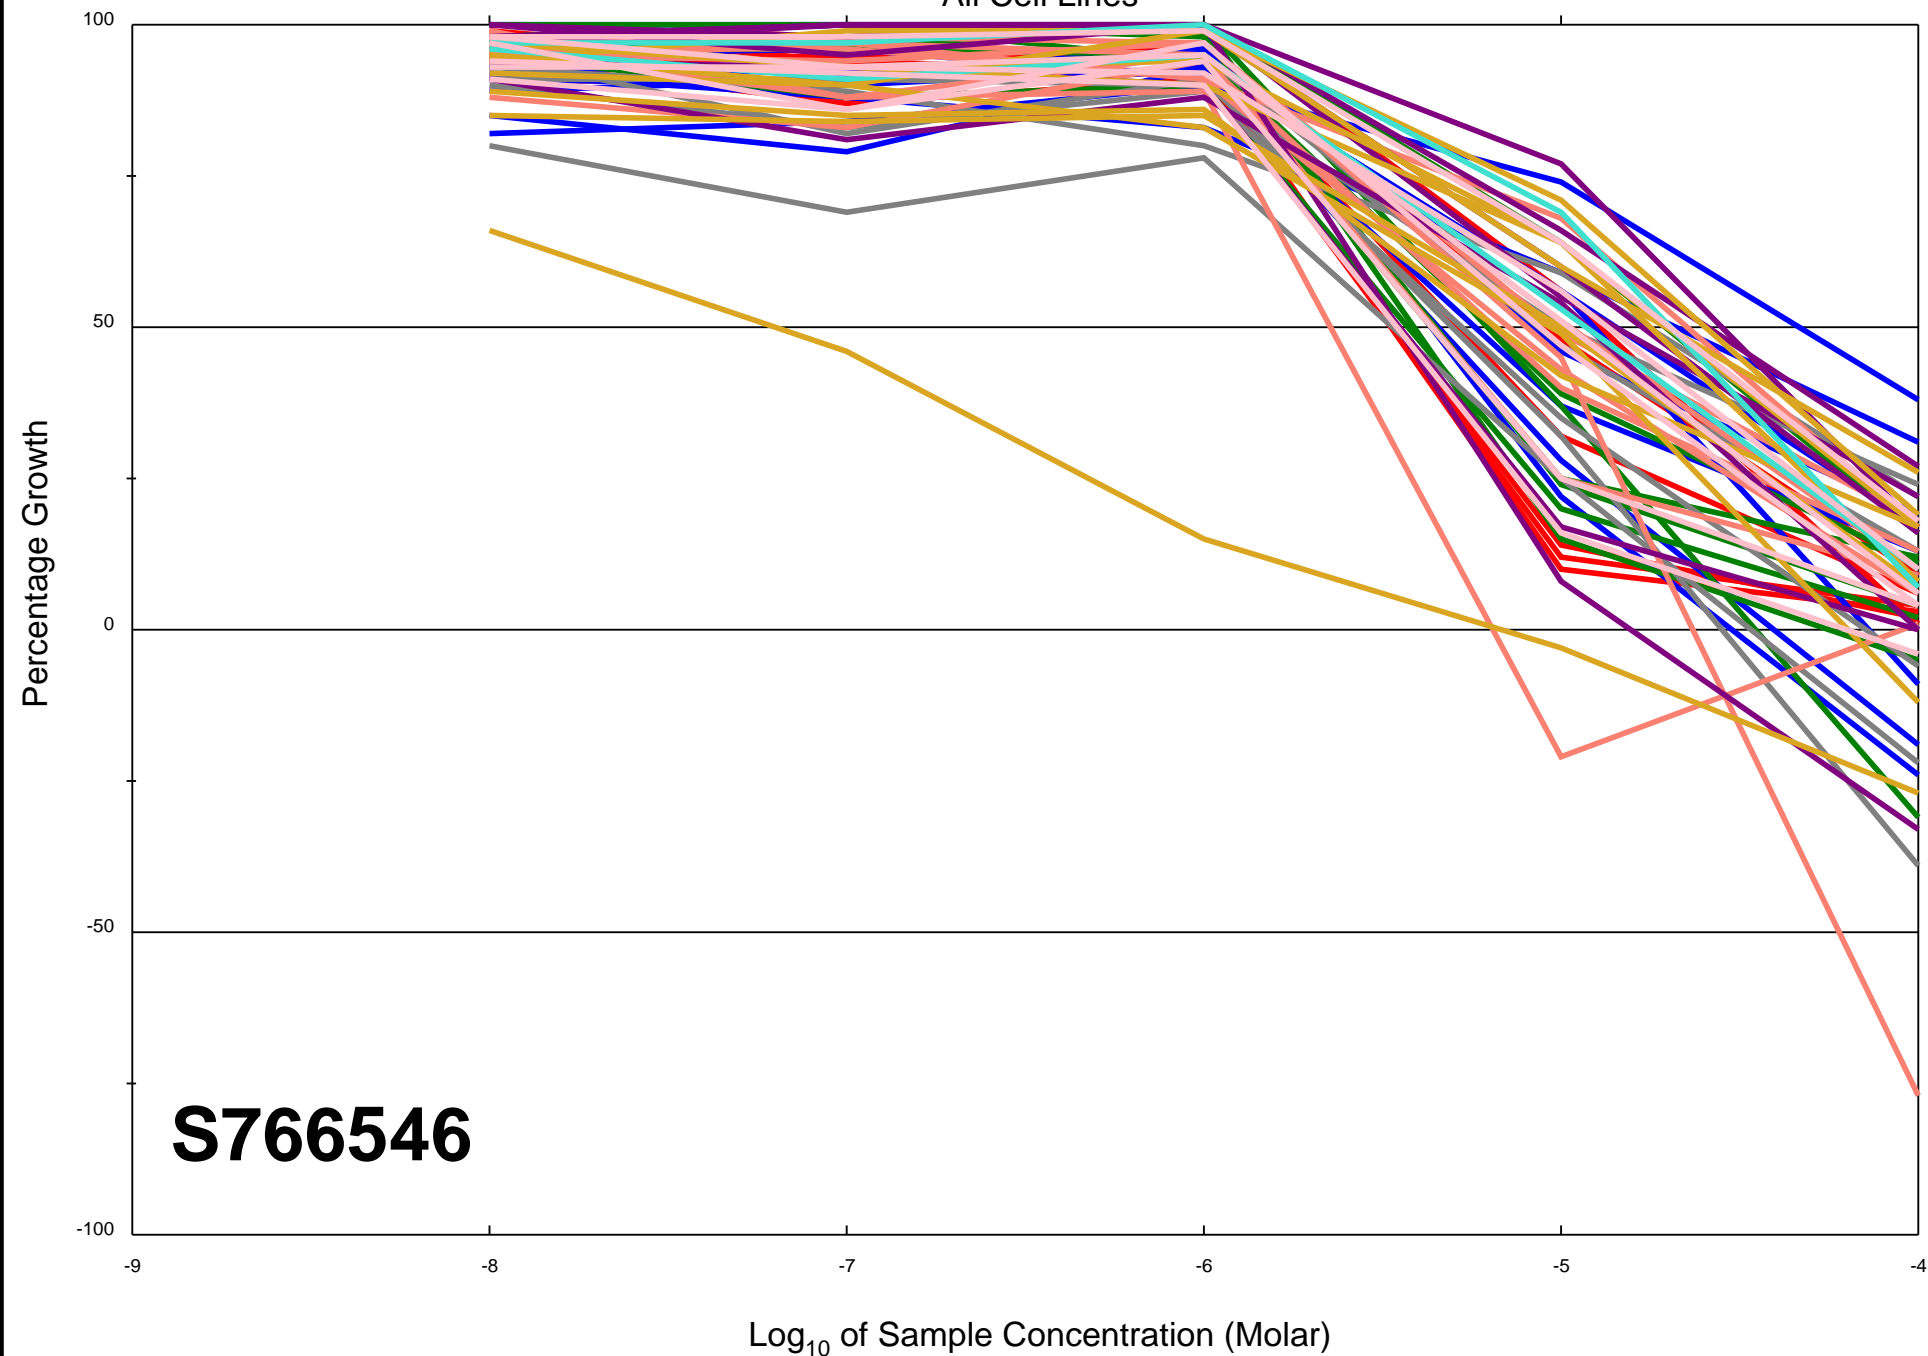

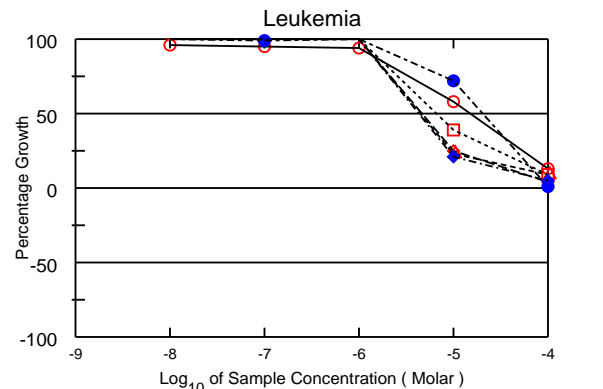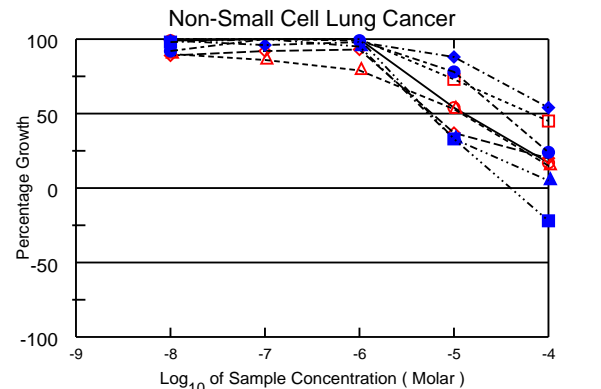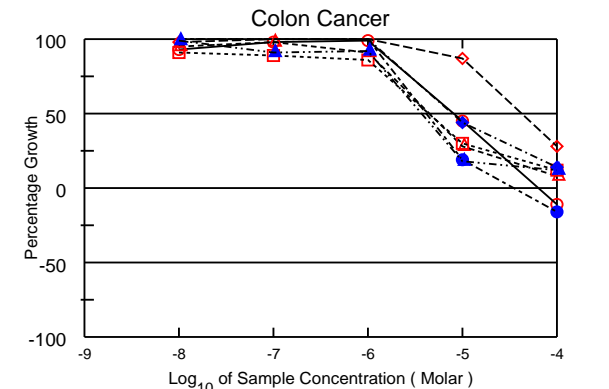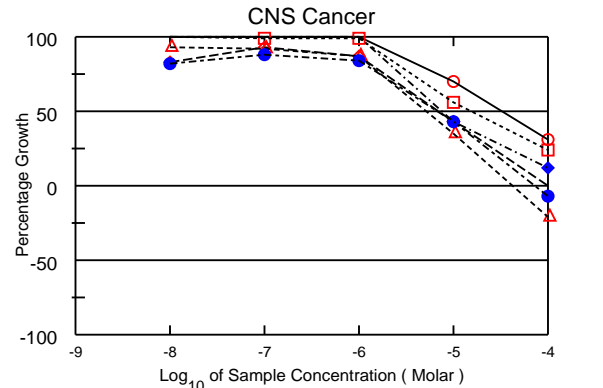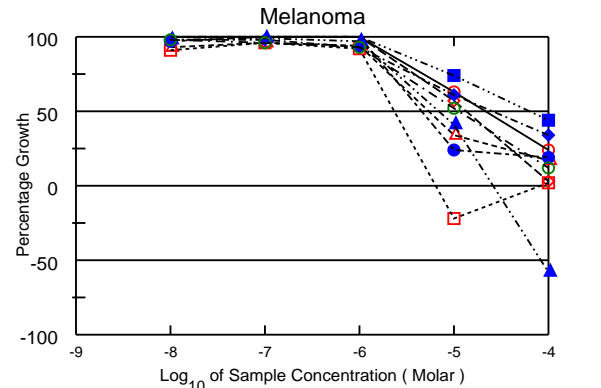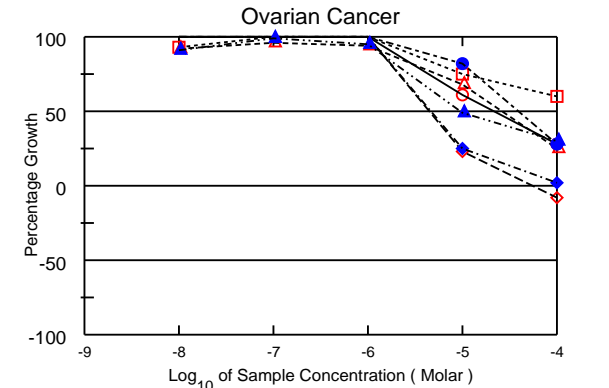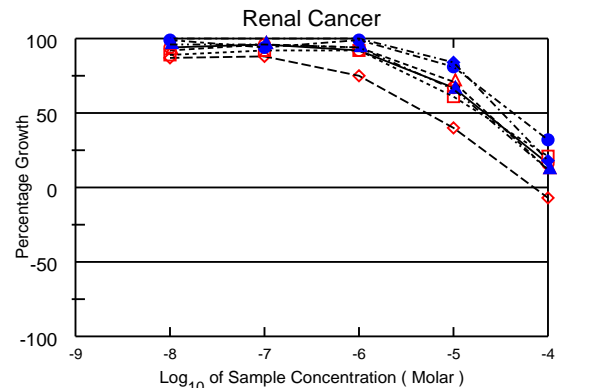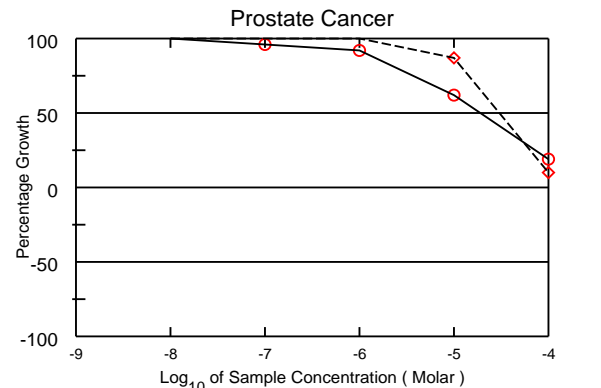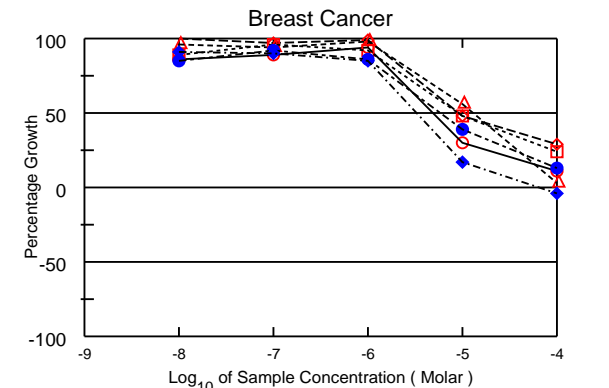

Mean Graphs

Report Date :July 13, 2015

Test Date :February 03, 2014

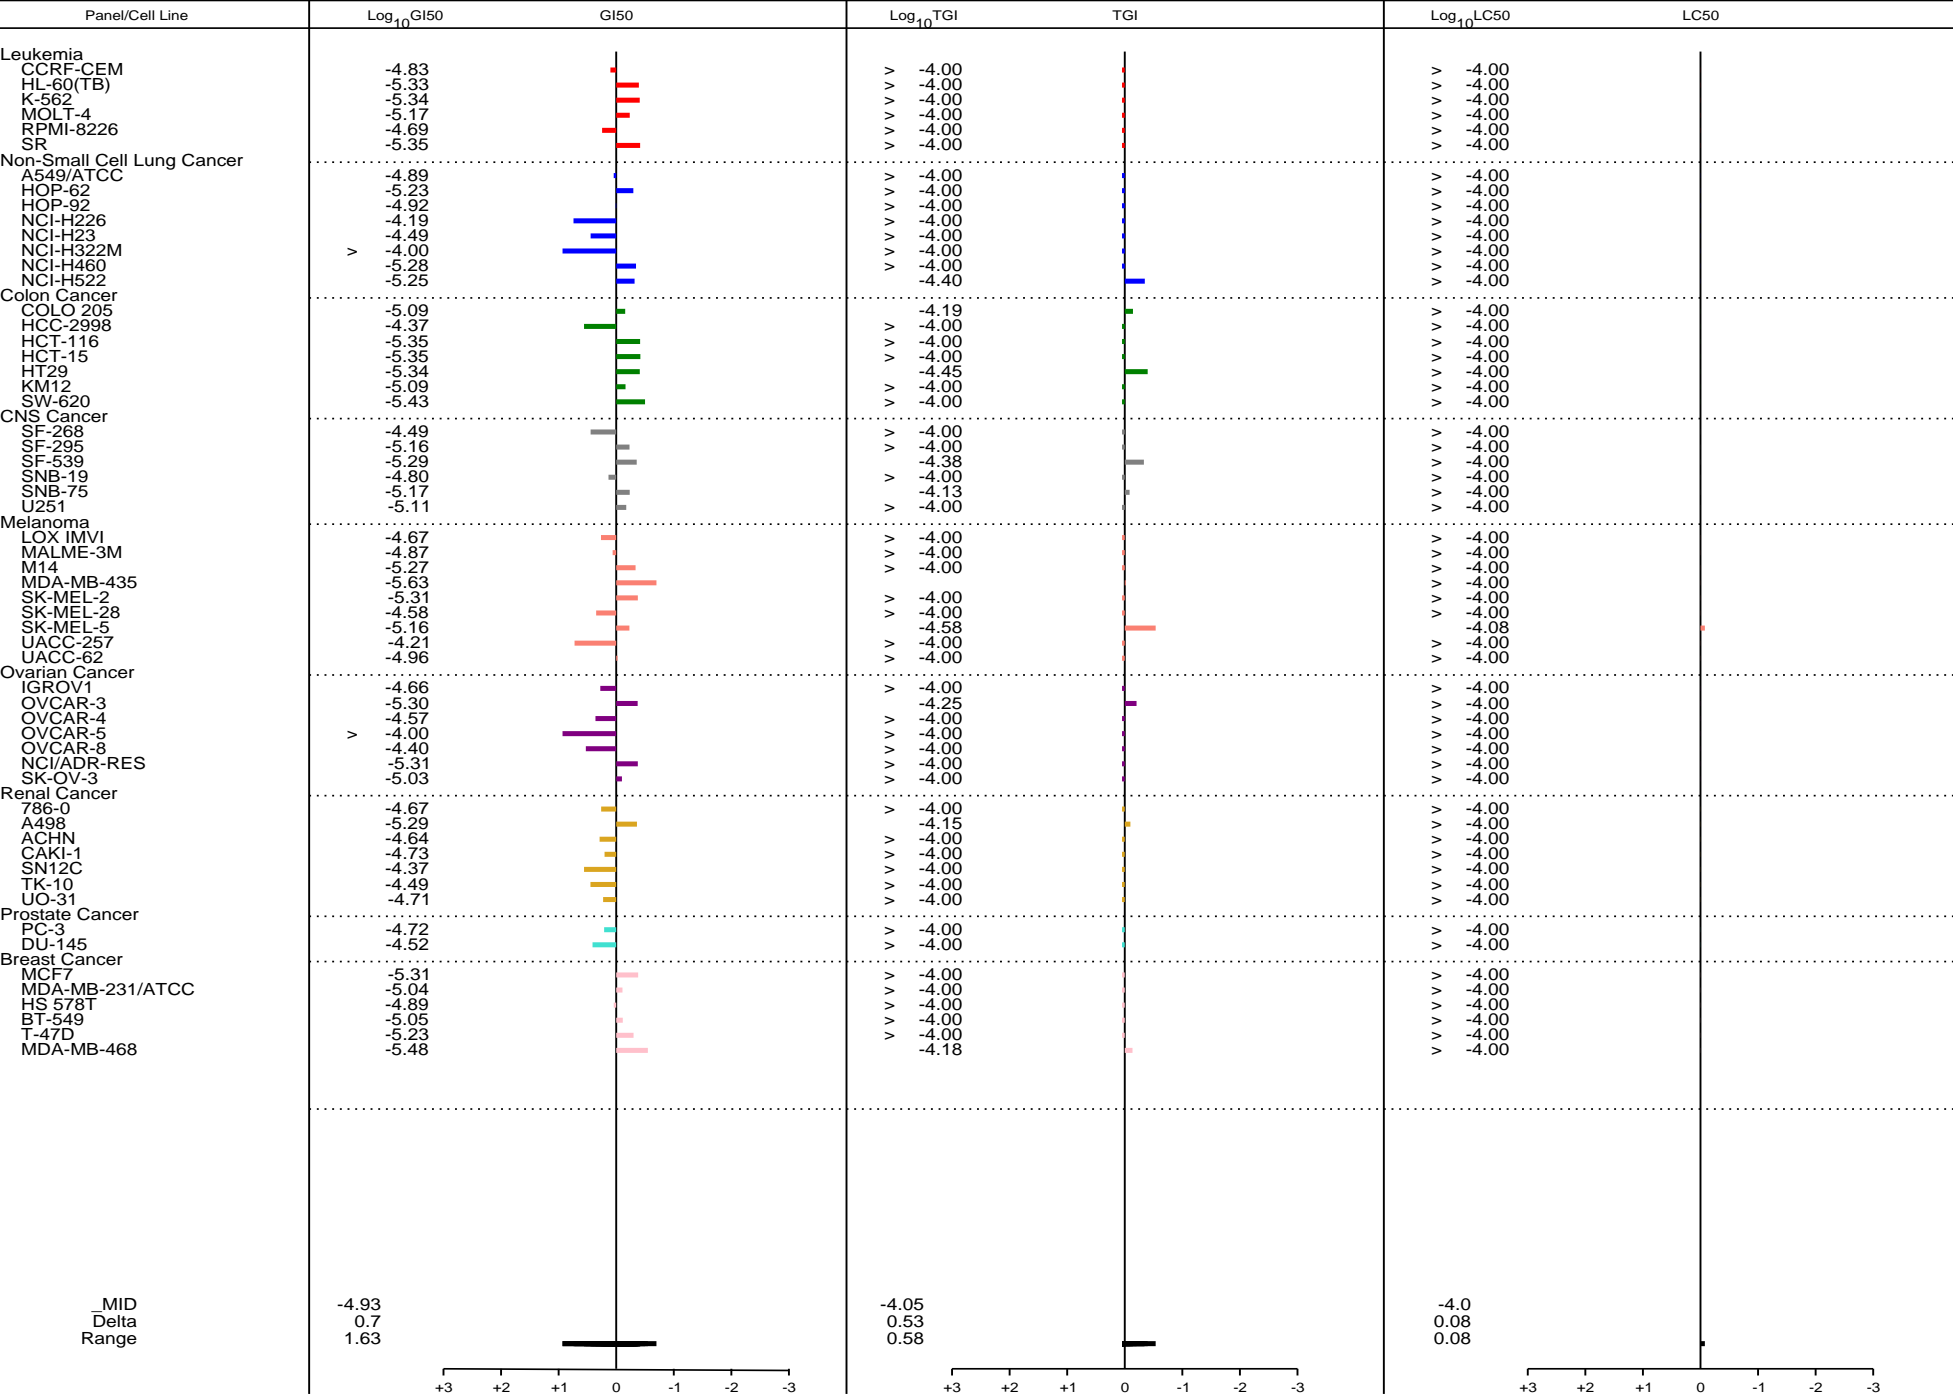

## All Cell Lines

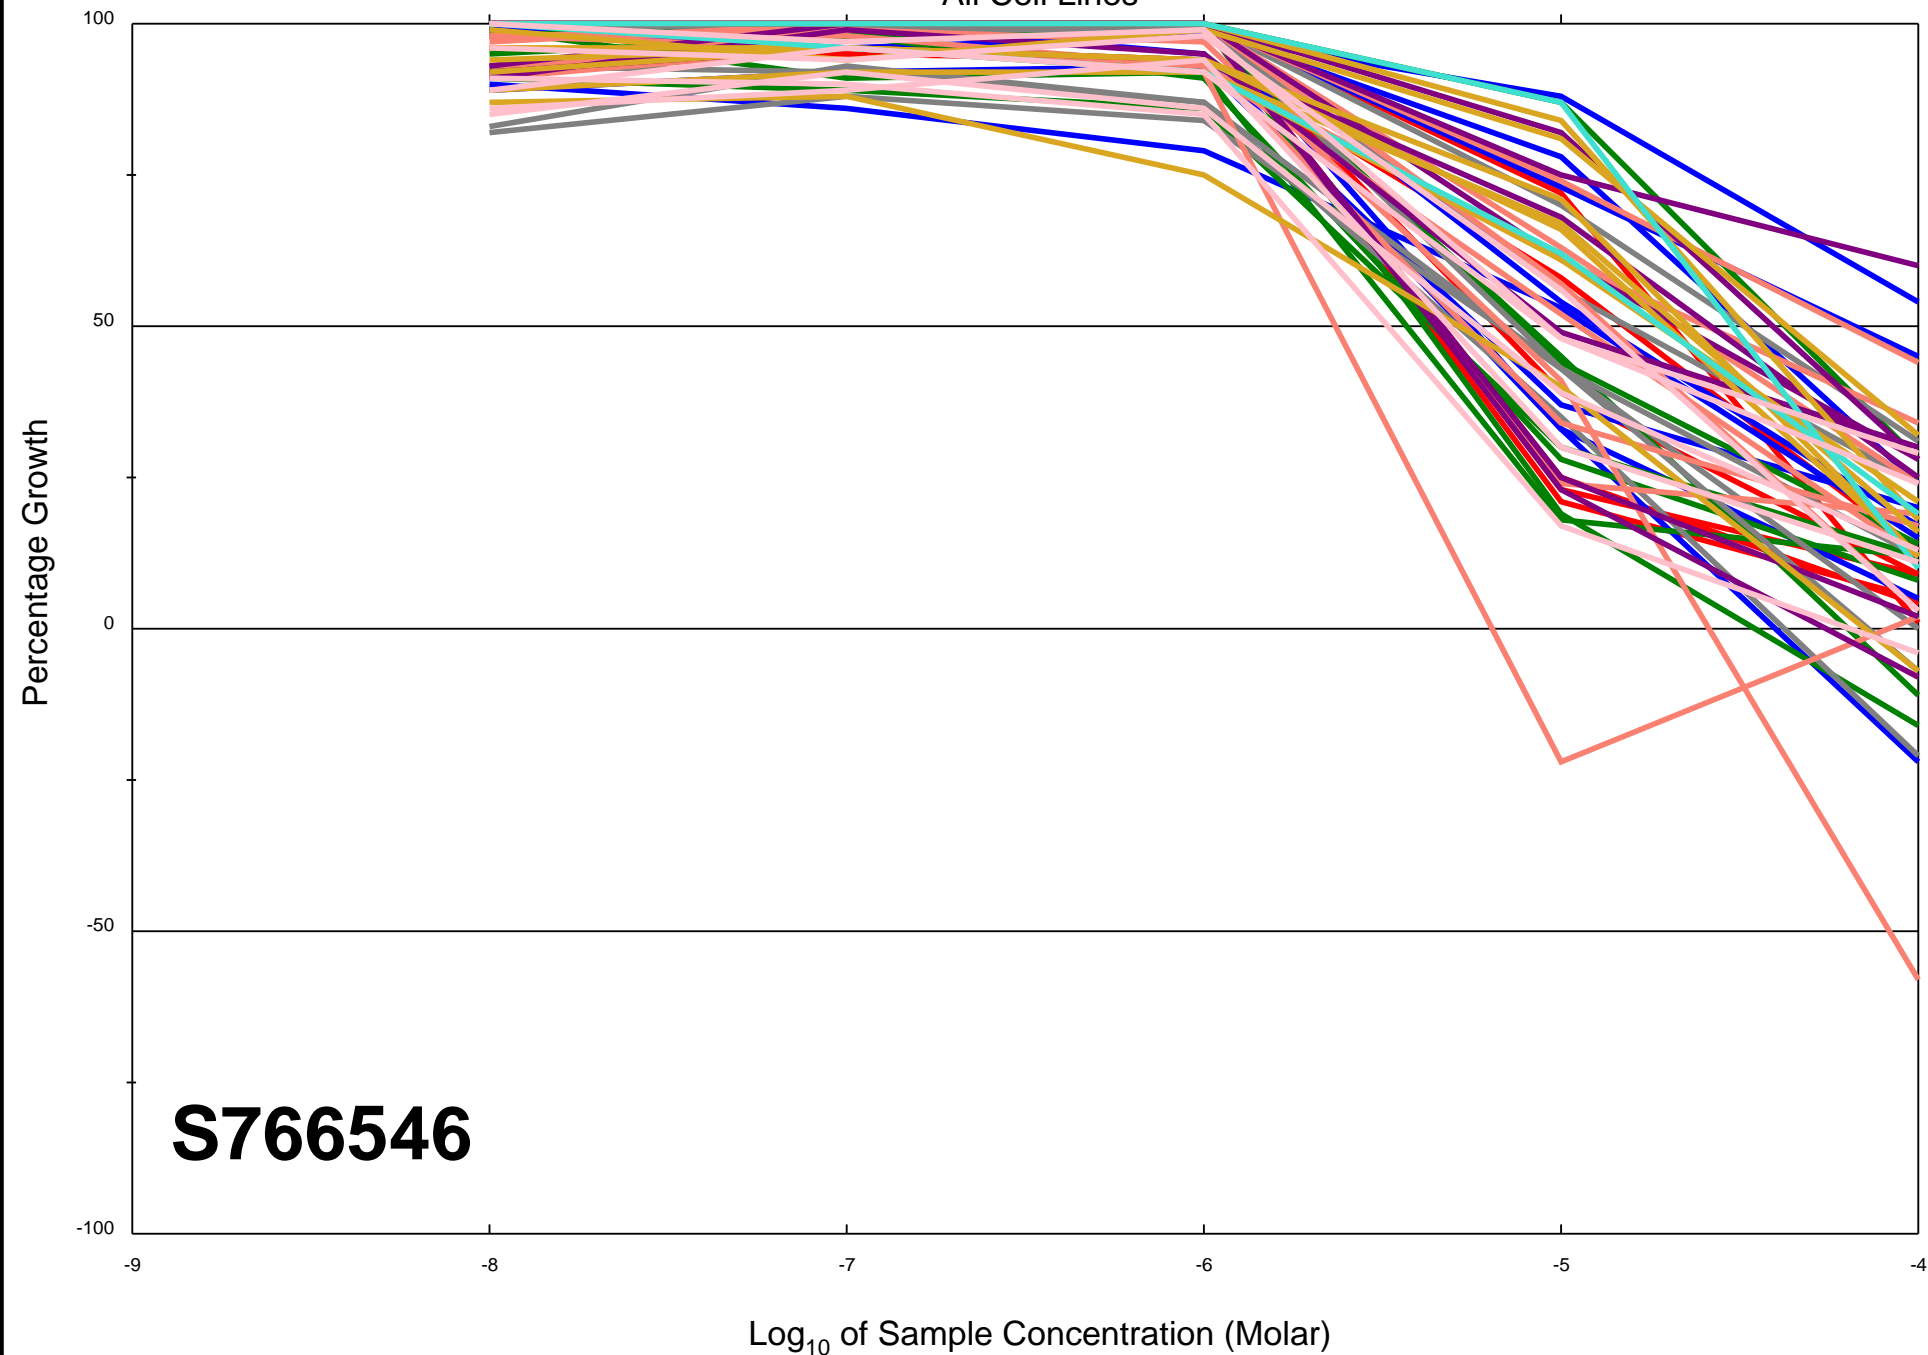

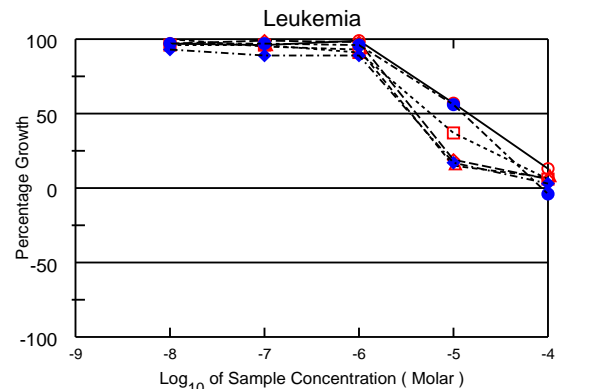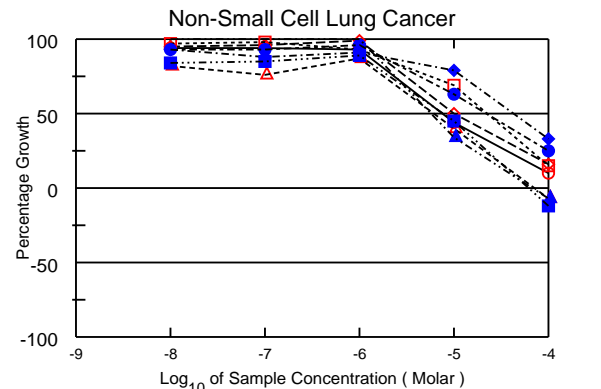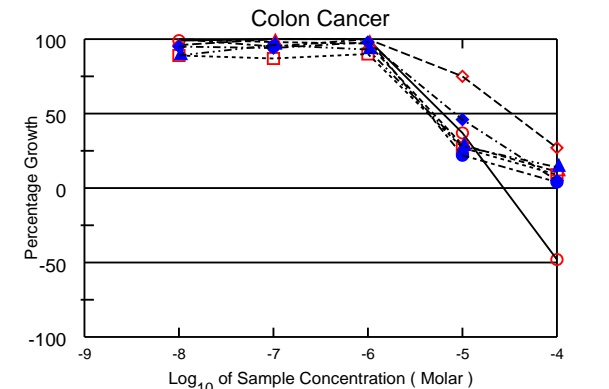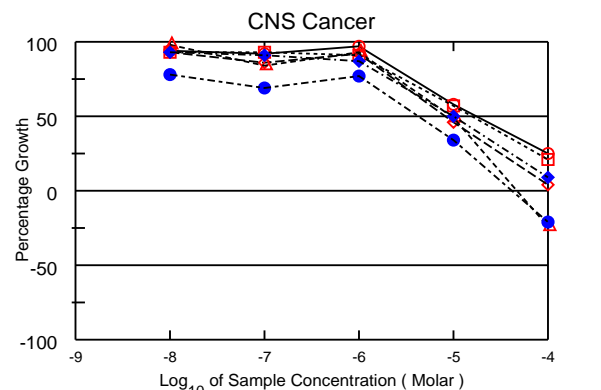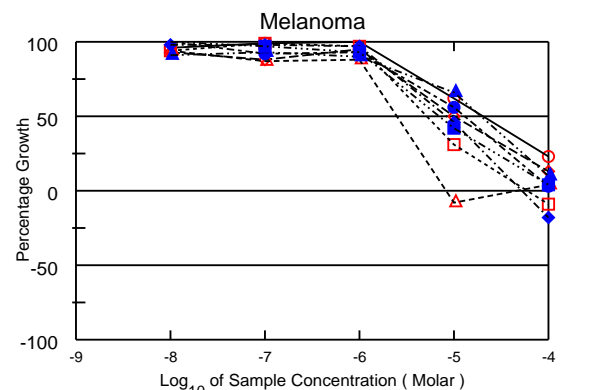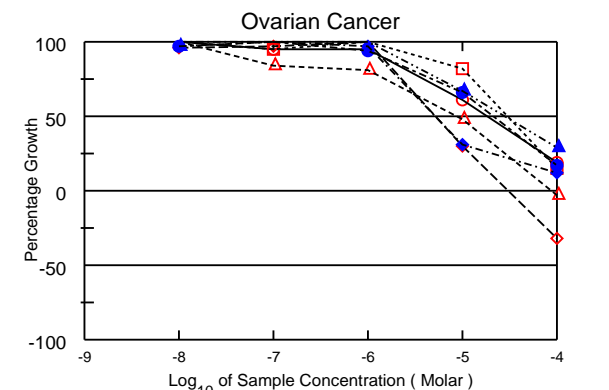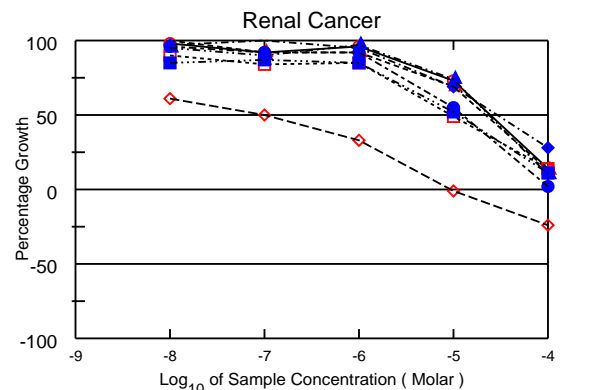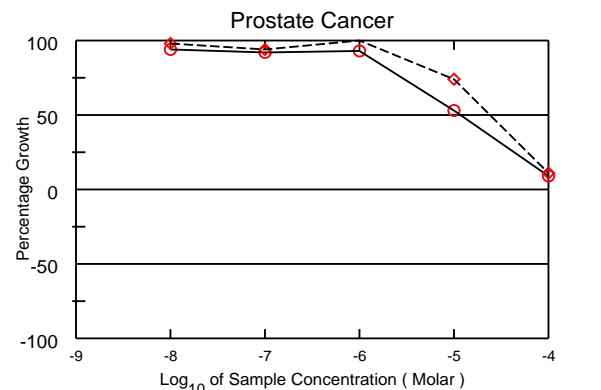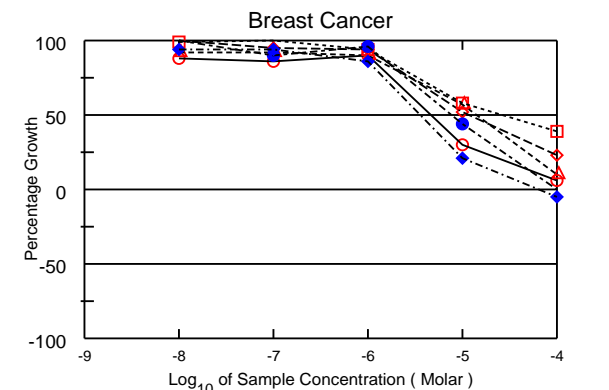

Mean Graphs

Report Date :July 13, 2015

Test Date :October 28, 2013

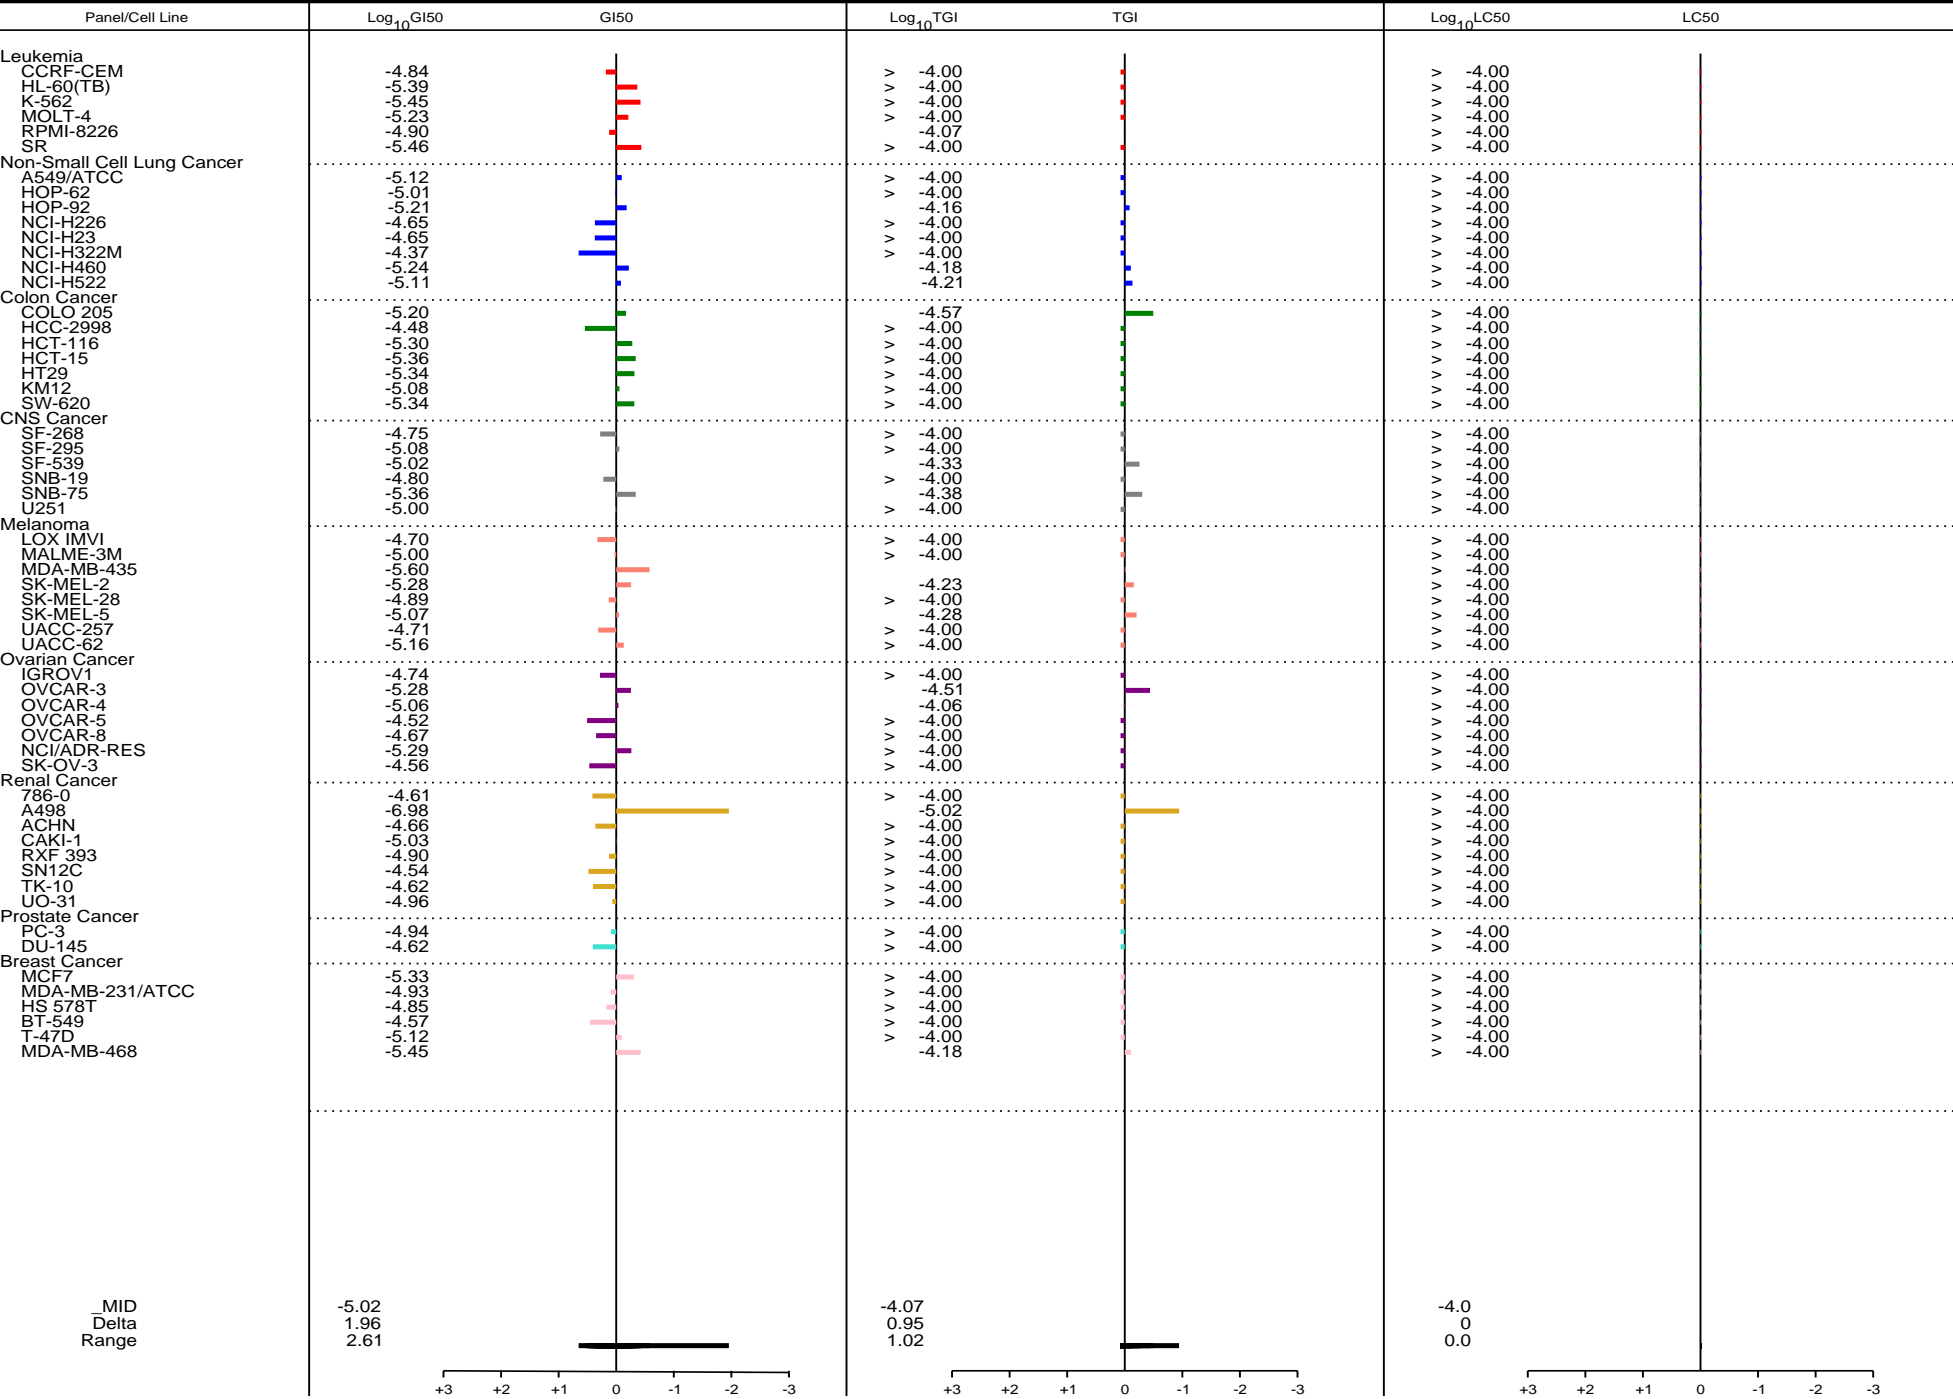

All Cell Lines

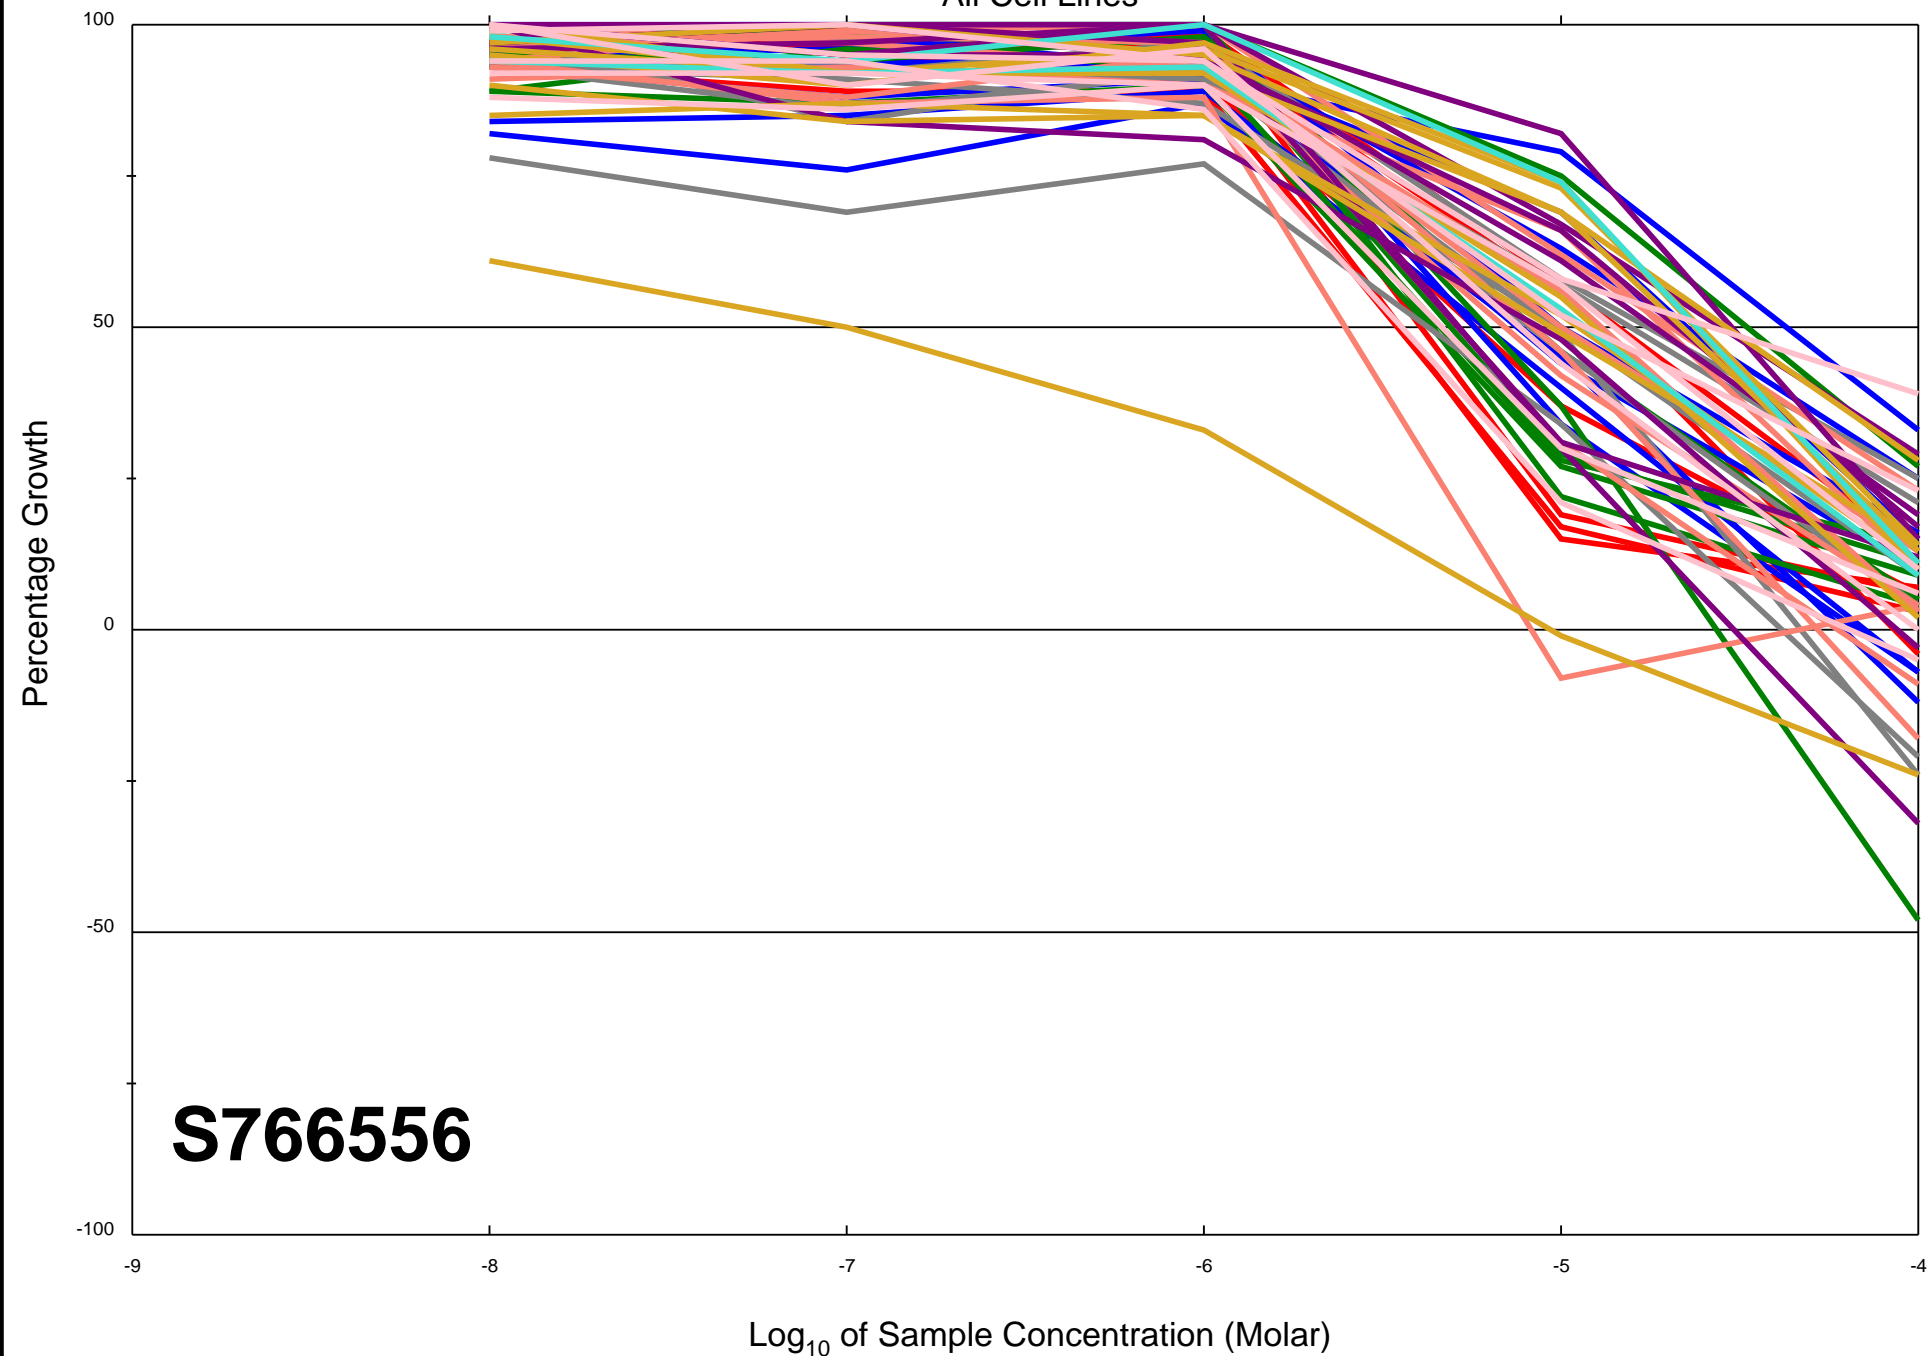

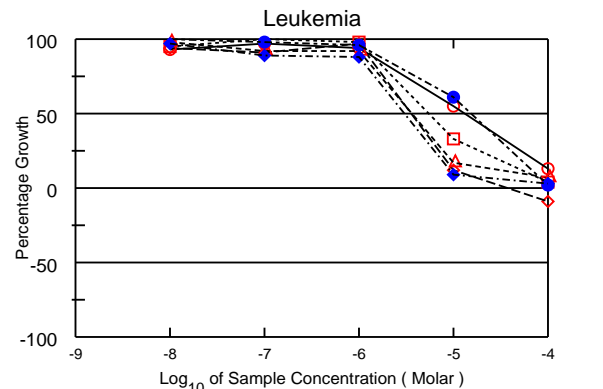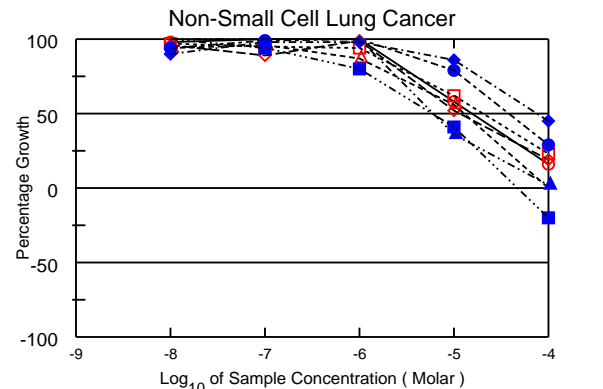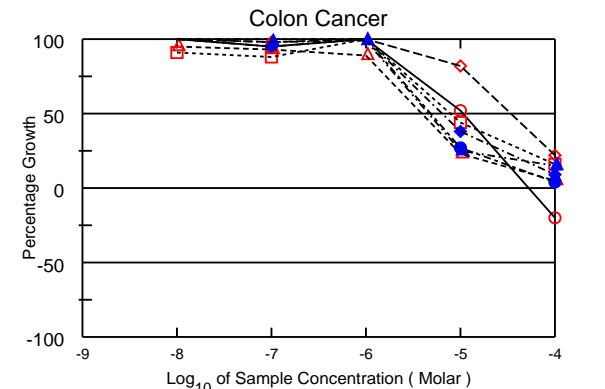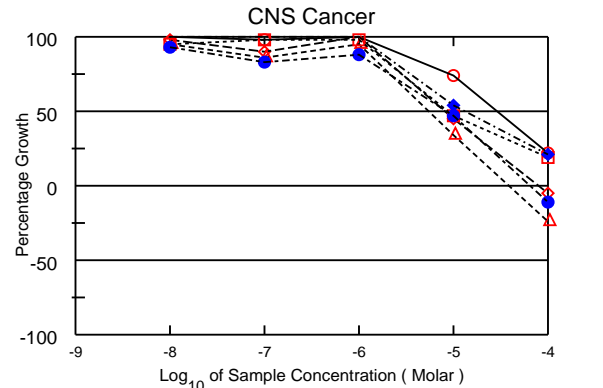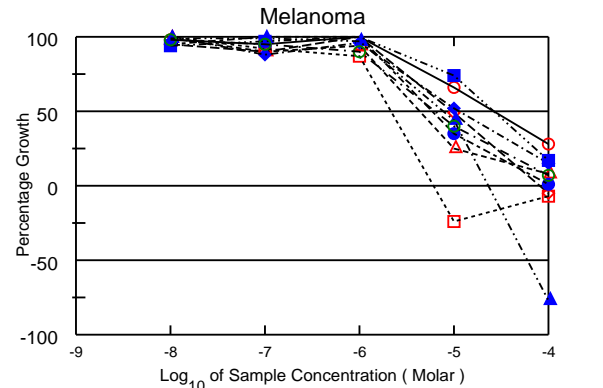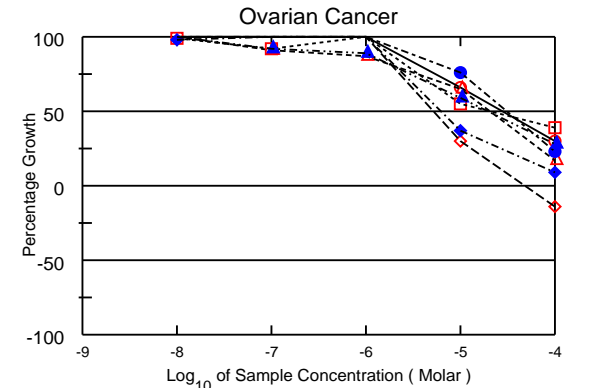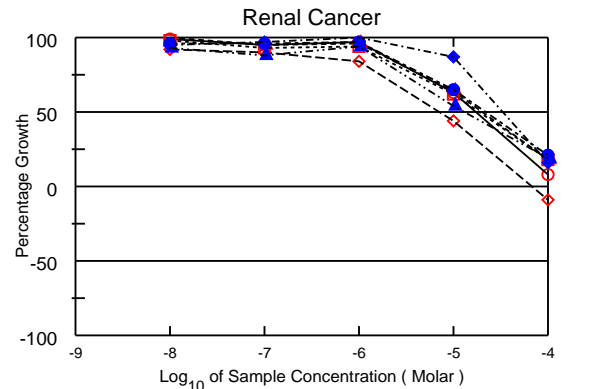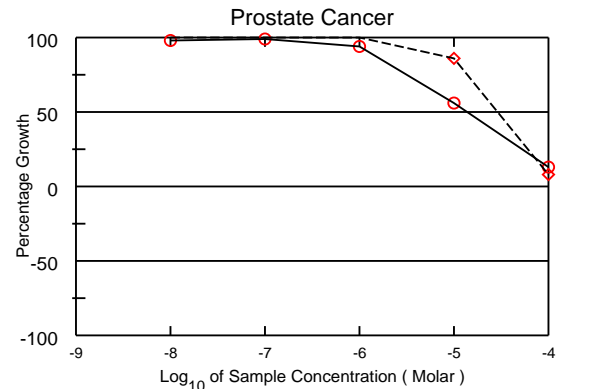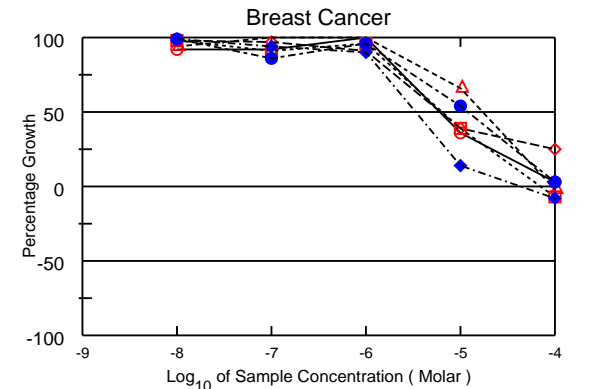

Mean Graphs

Report Date :July 13, 2015

Test Date :February 03, 2014

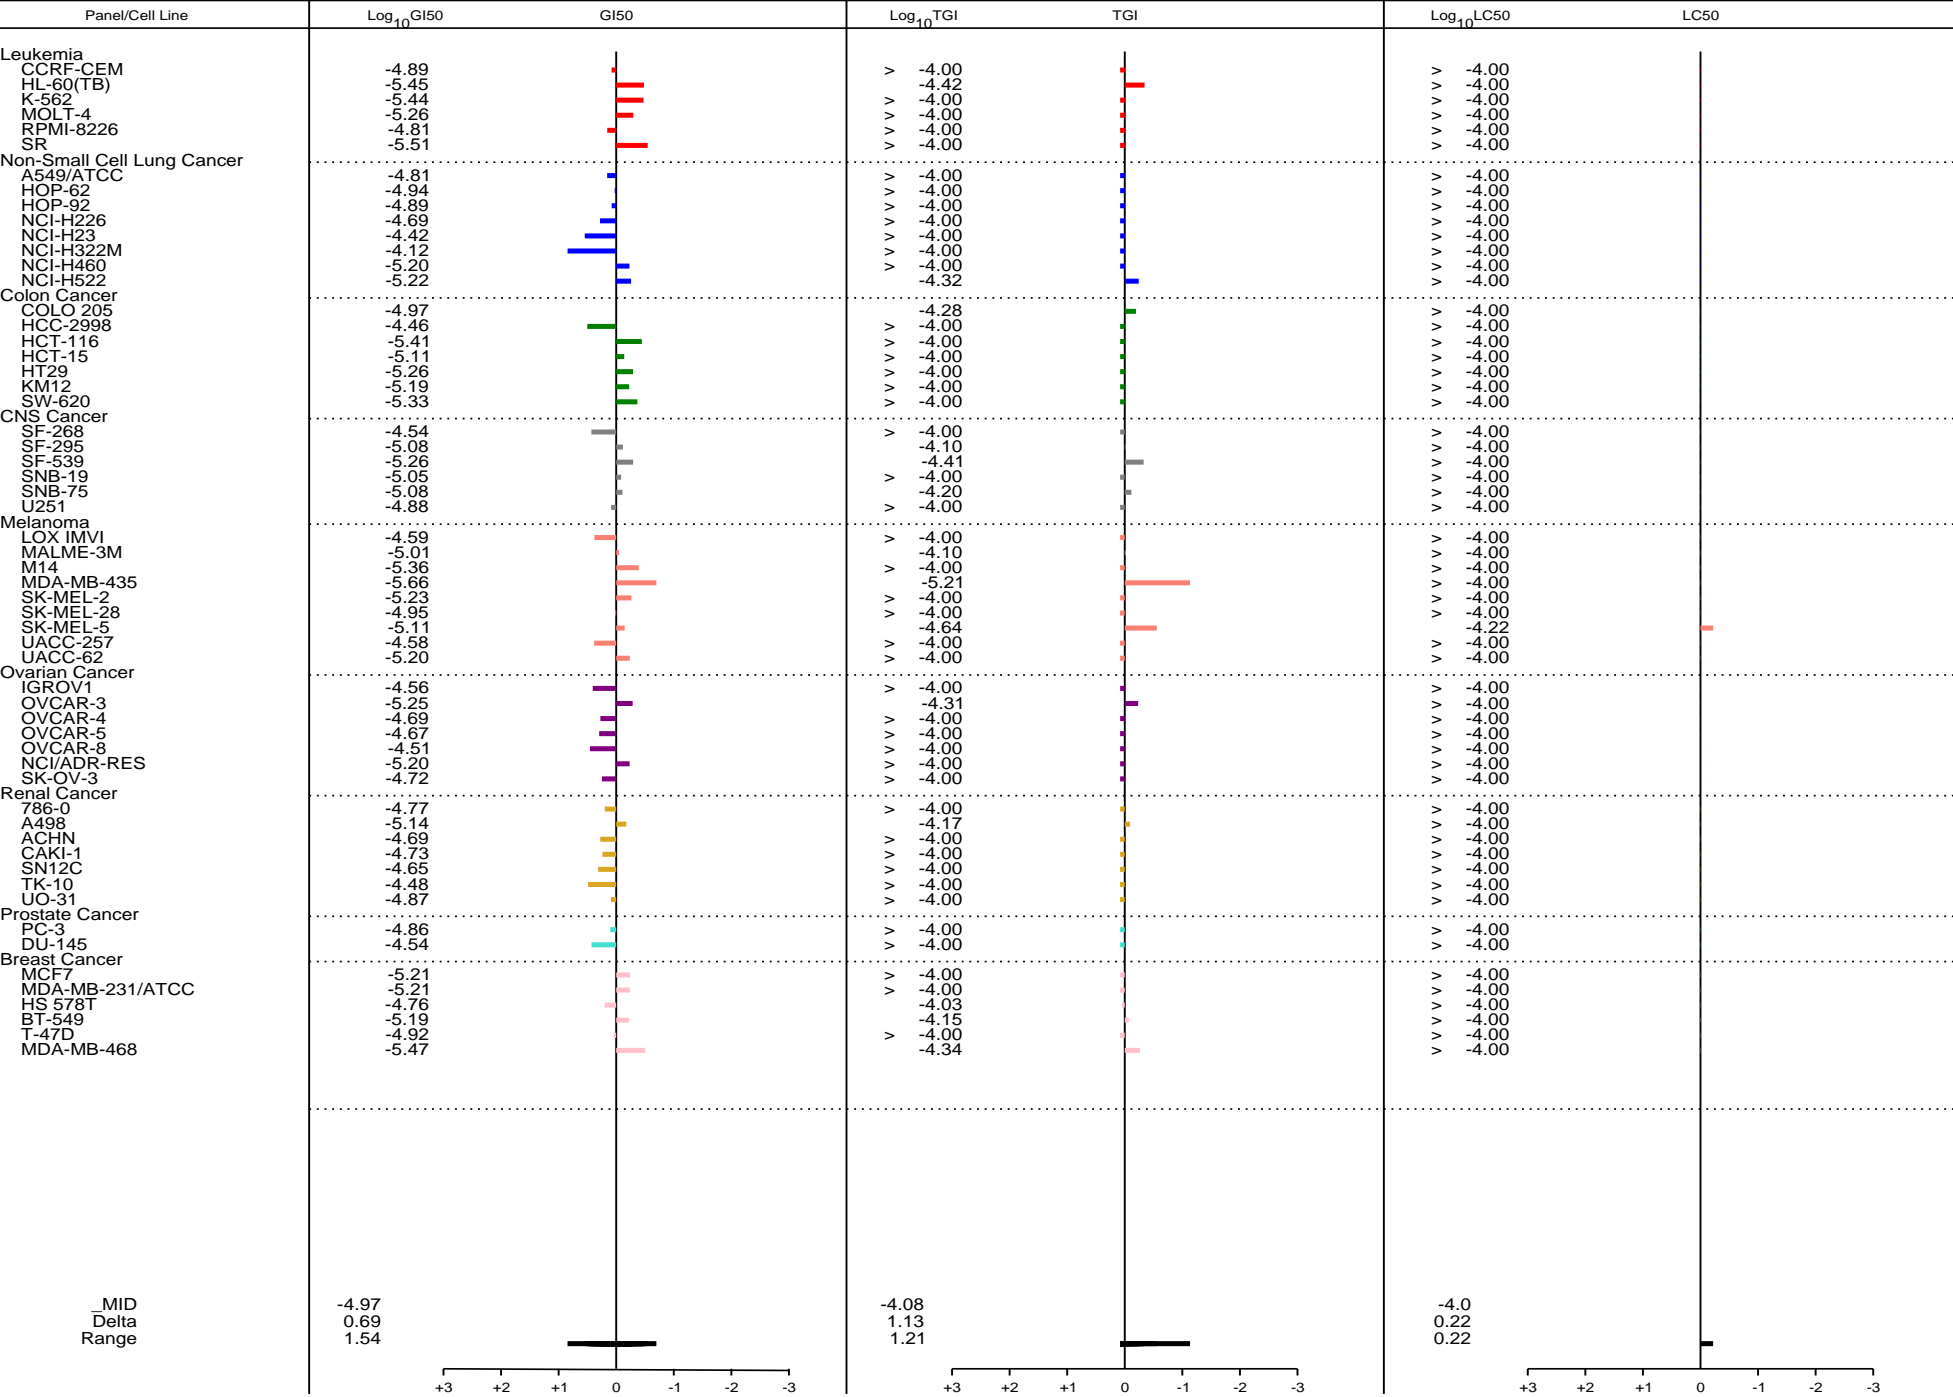

All Cell Lines

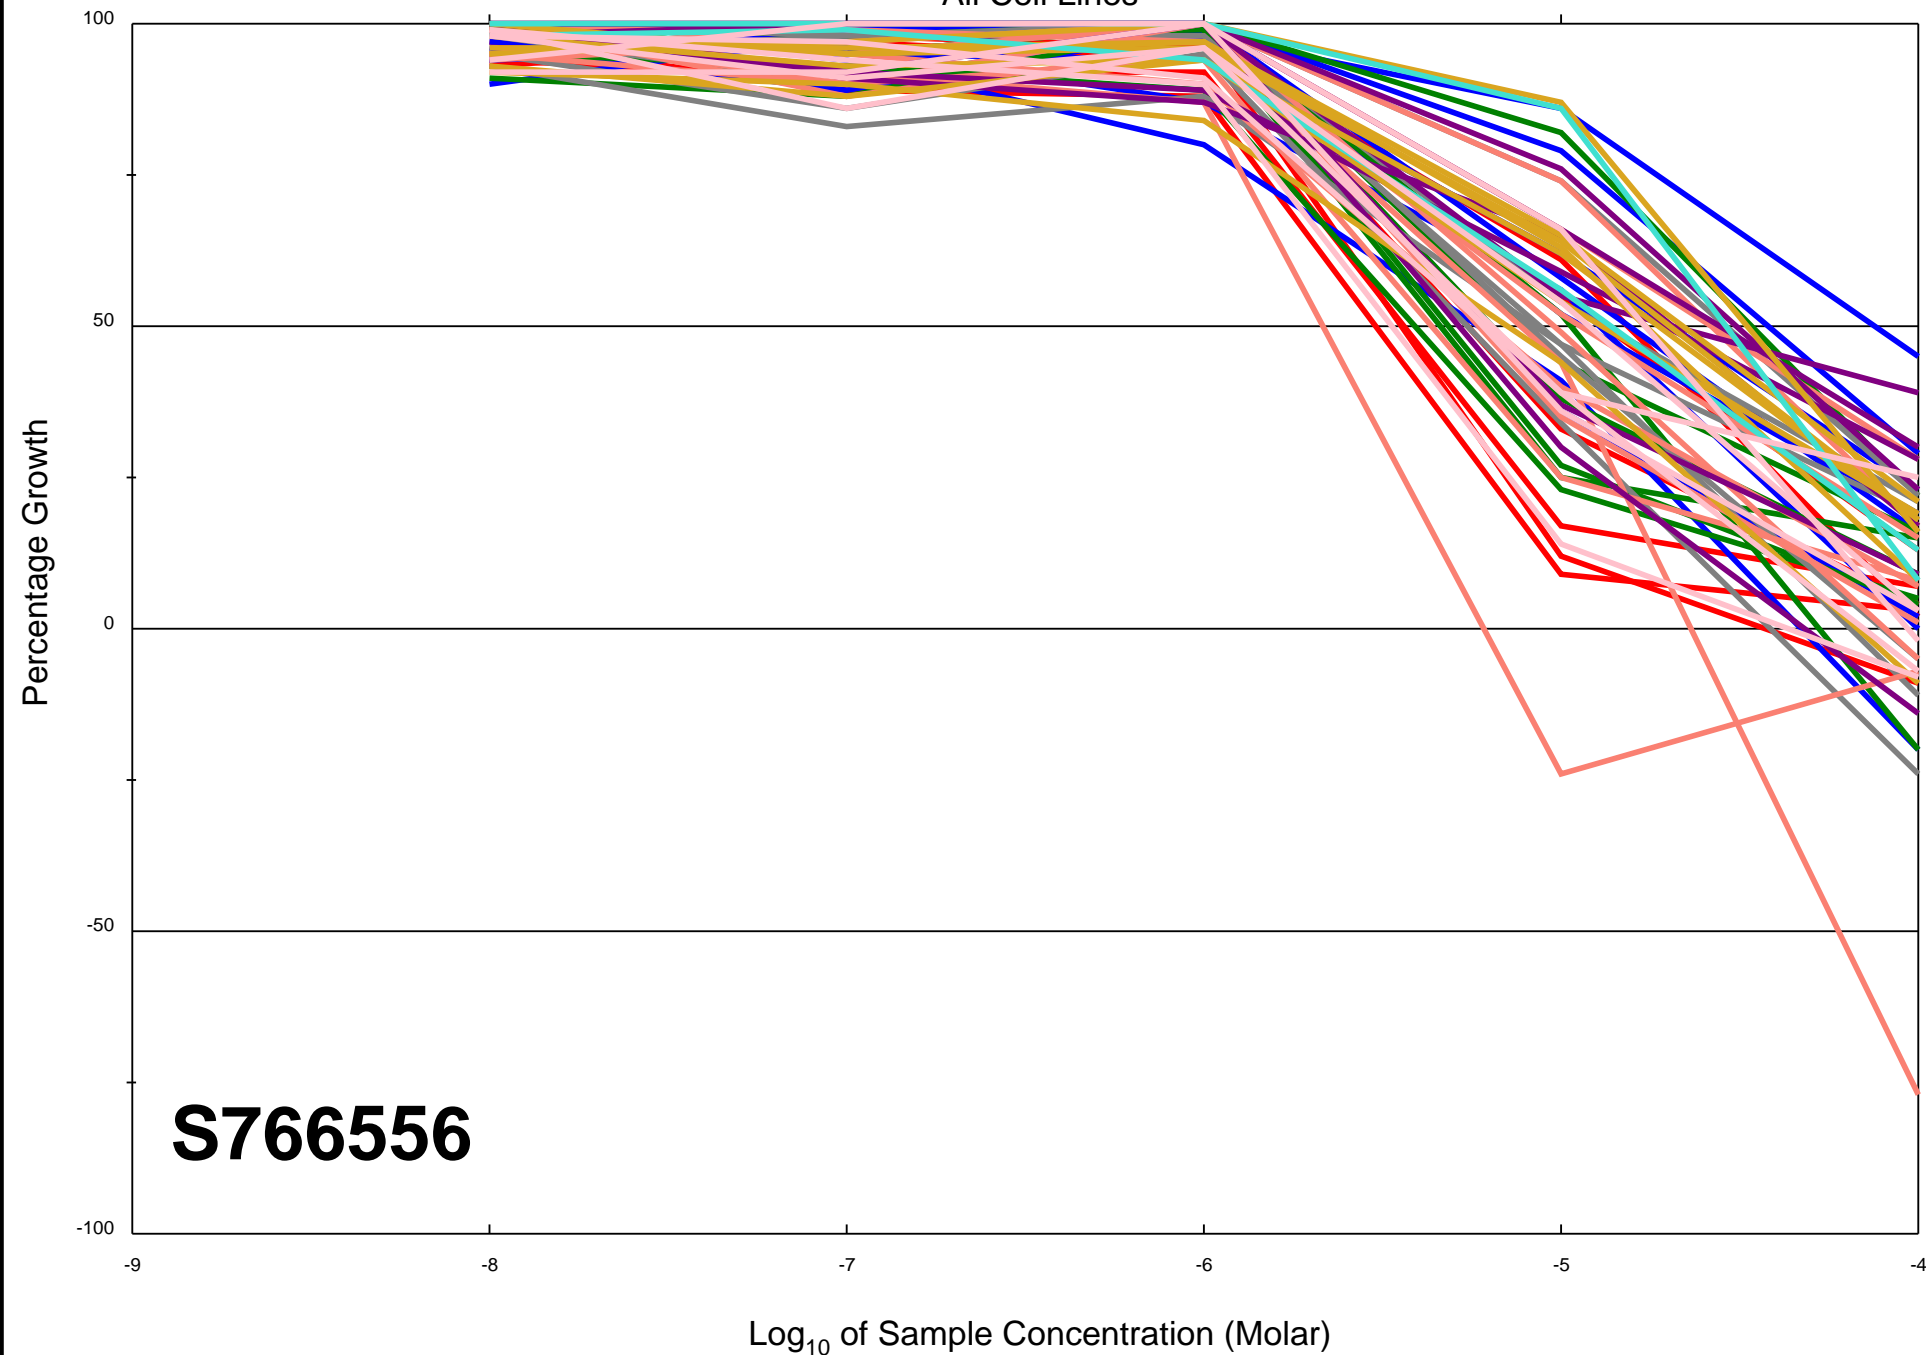

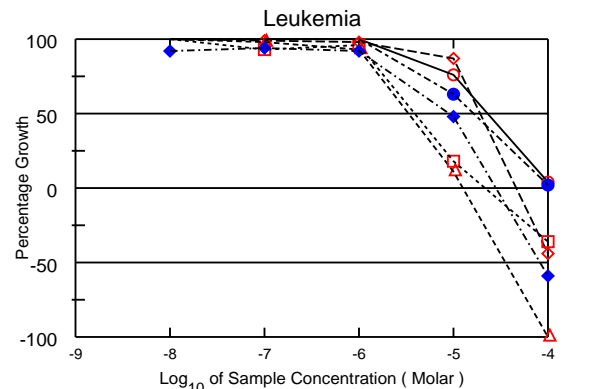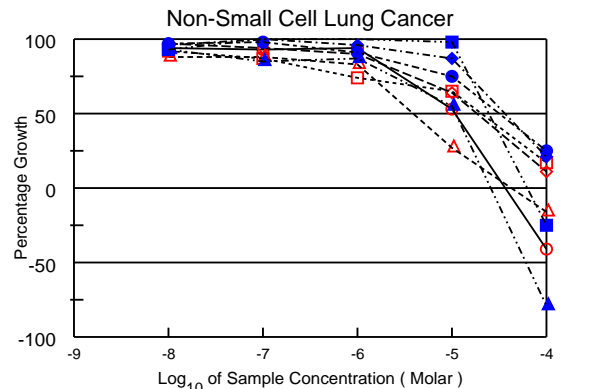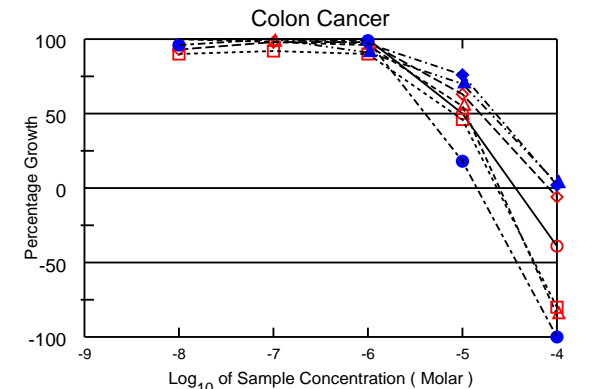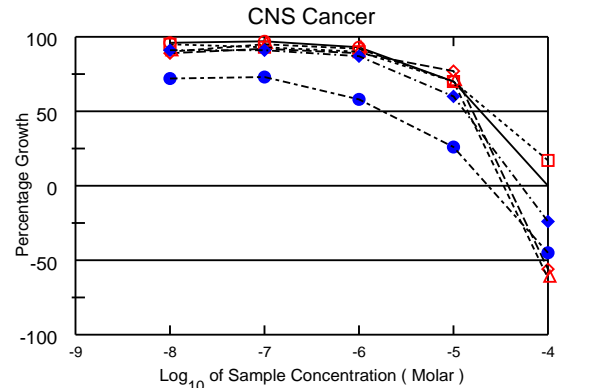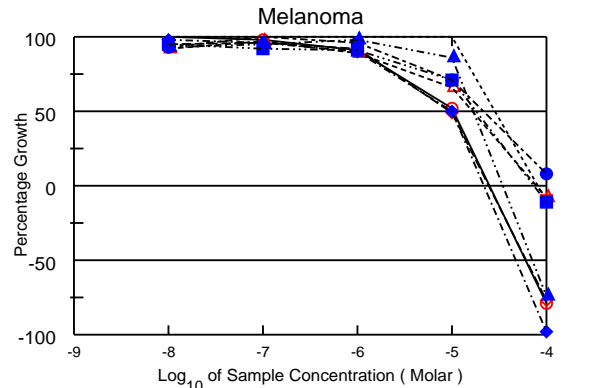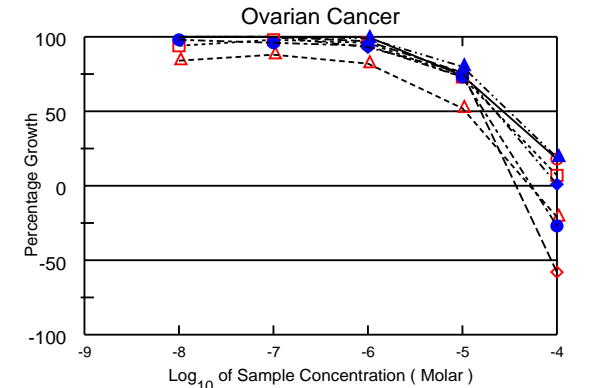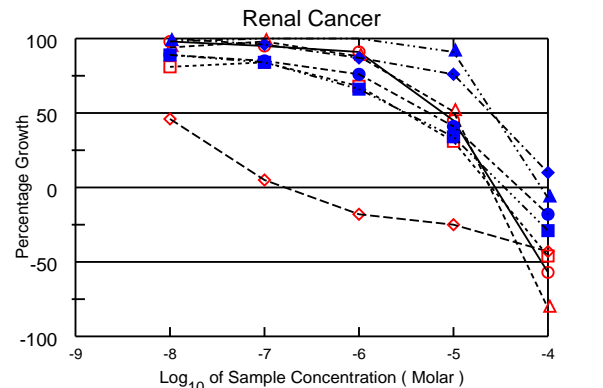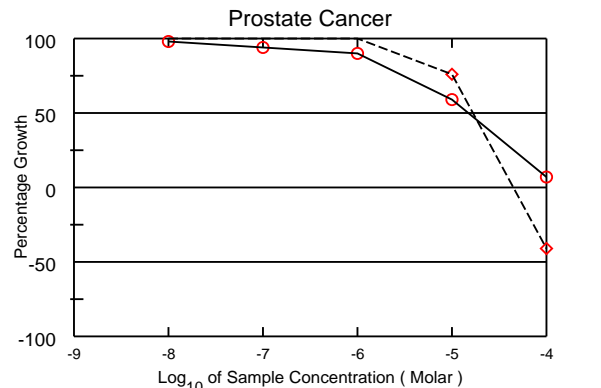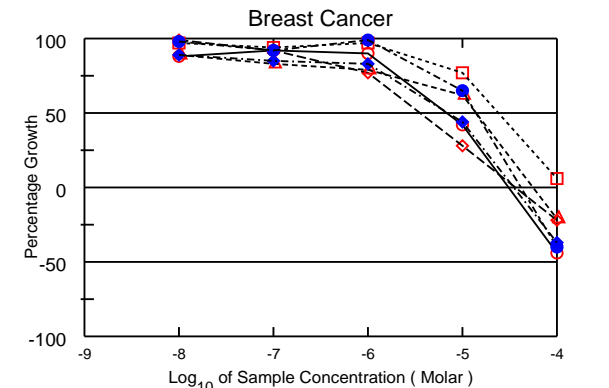

Mean Graphs

Report Date :July 13, 2015

Test Date :October 28, 2013

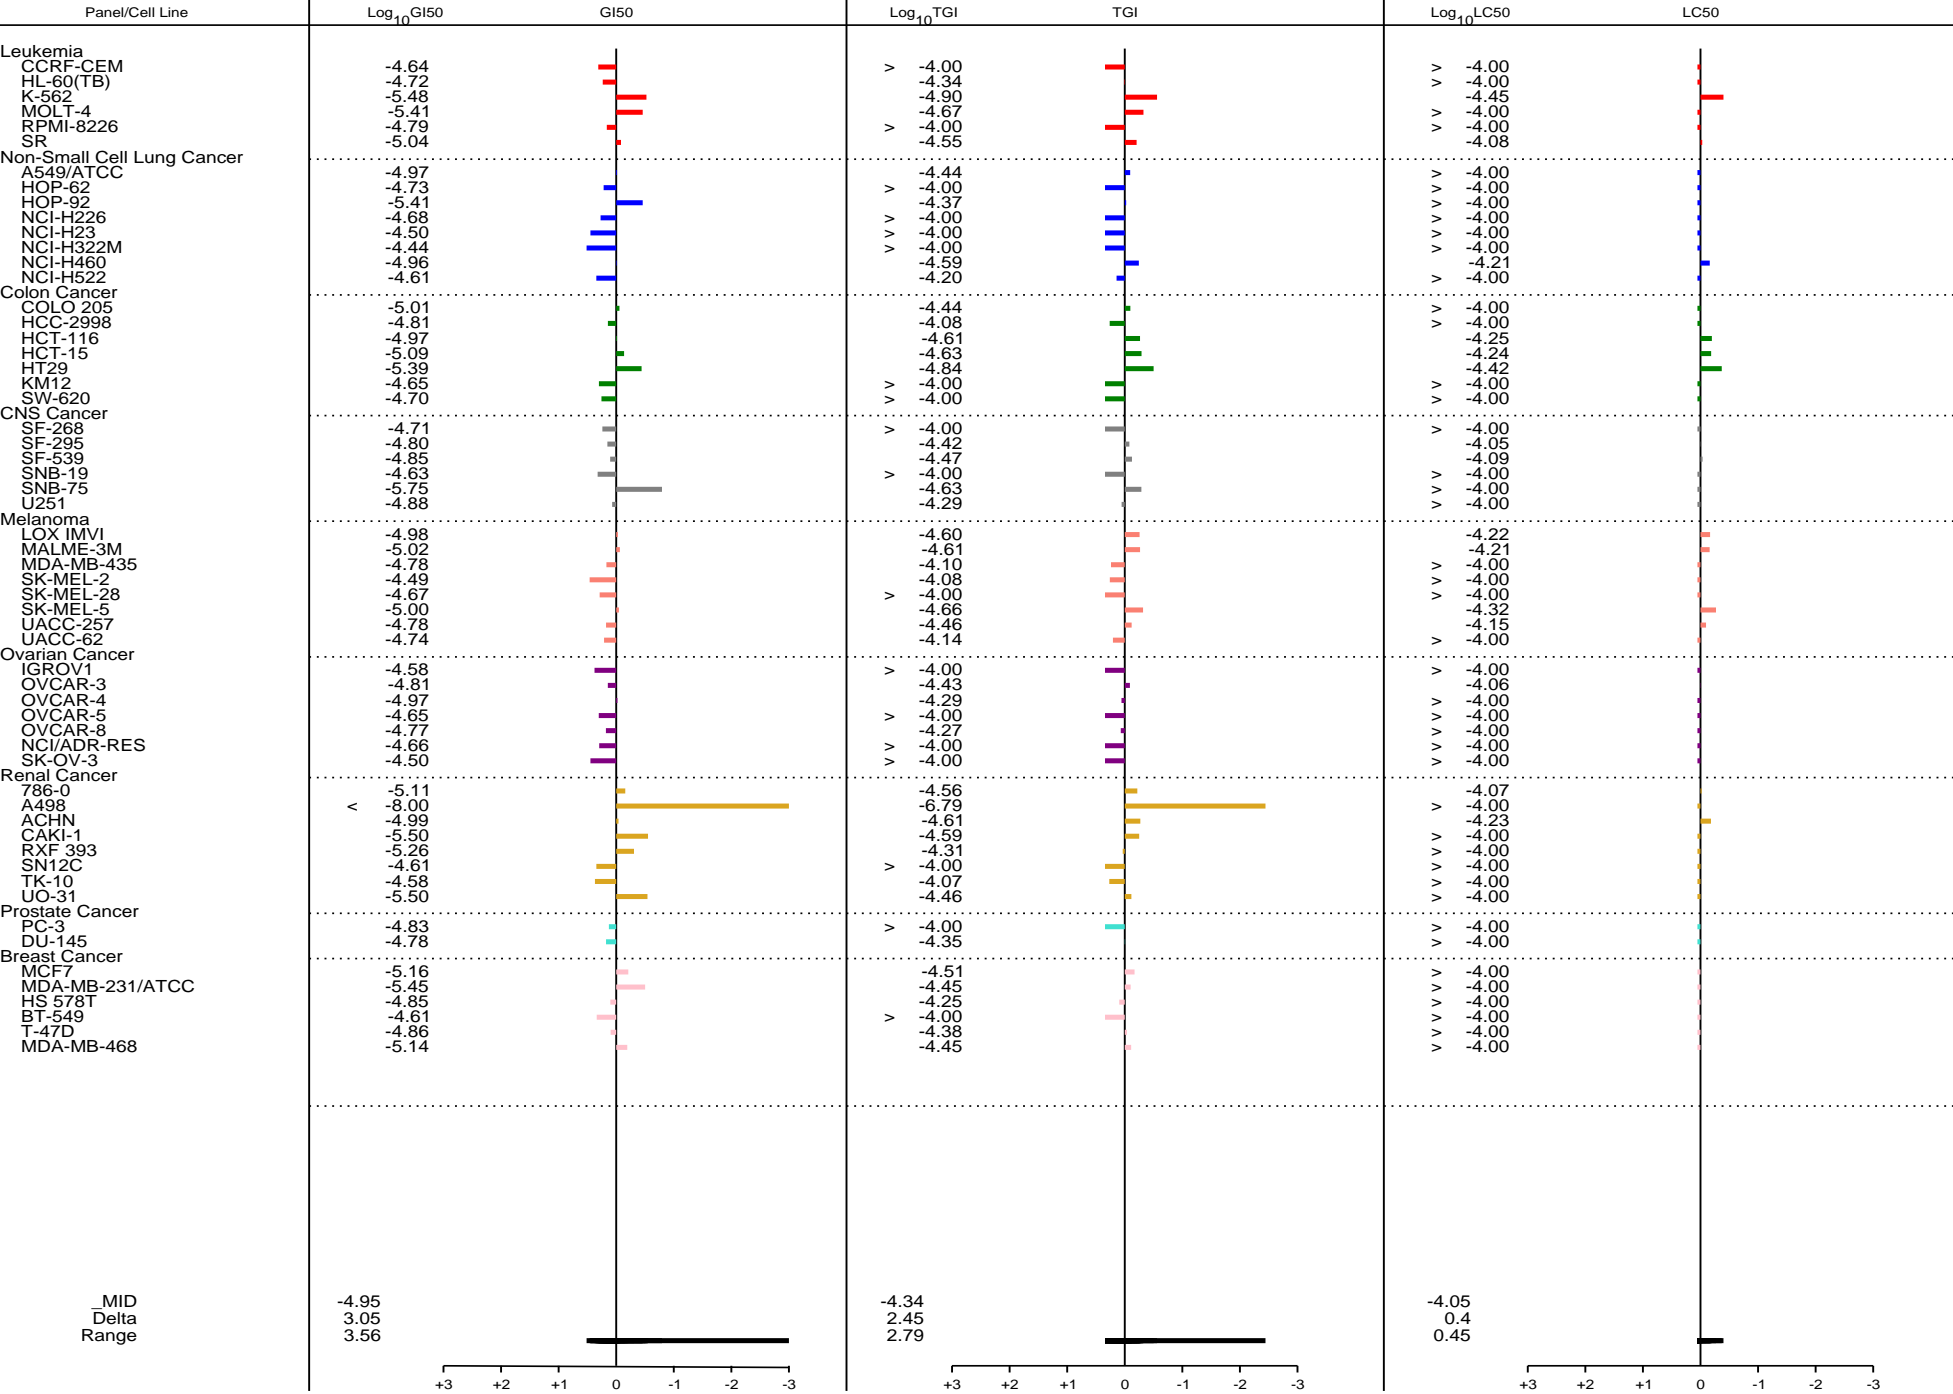

All Cell Lines

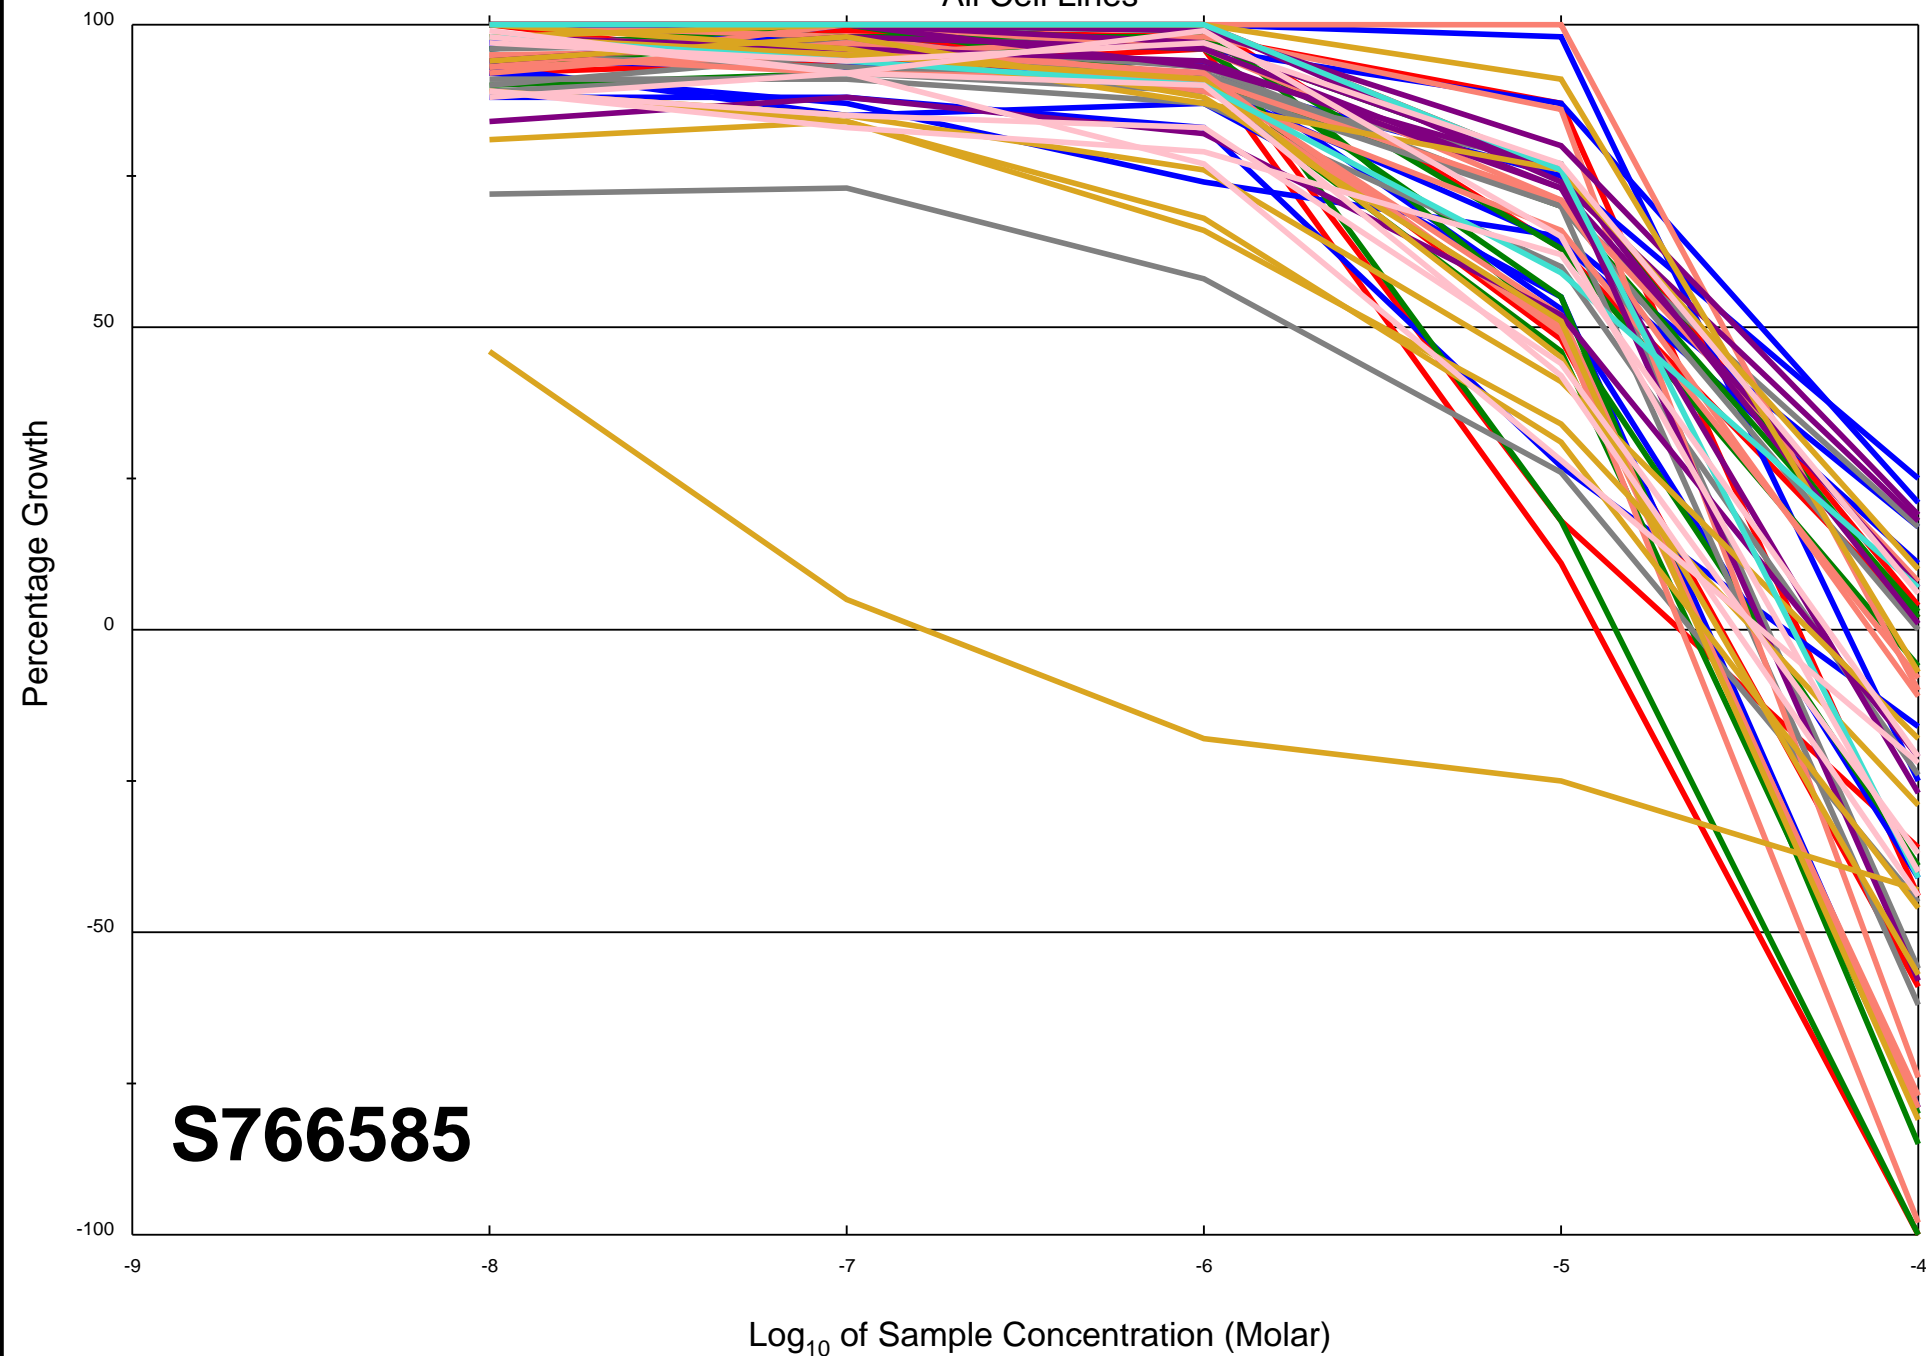

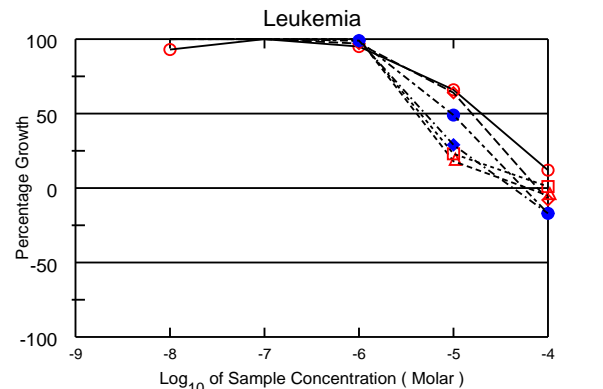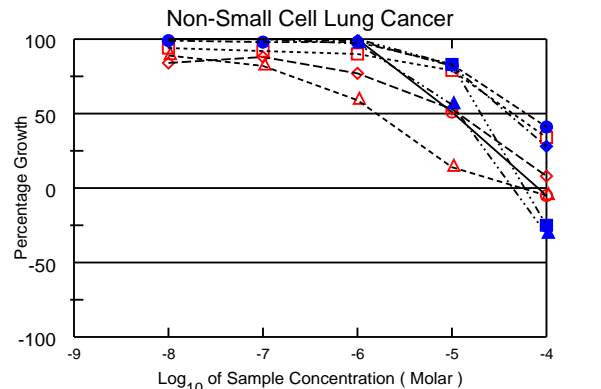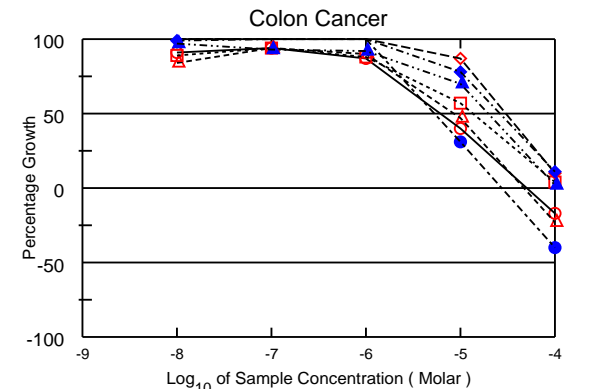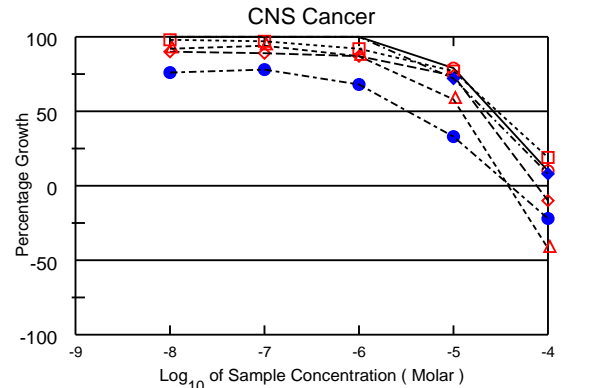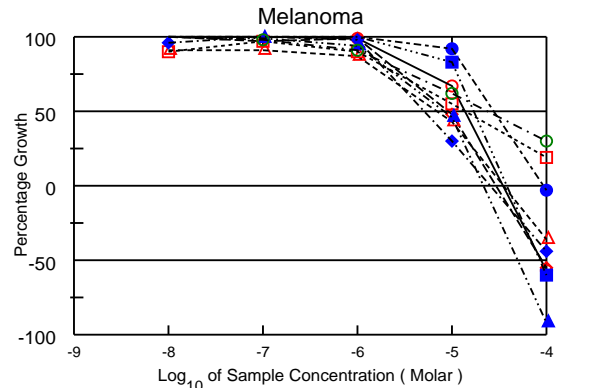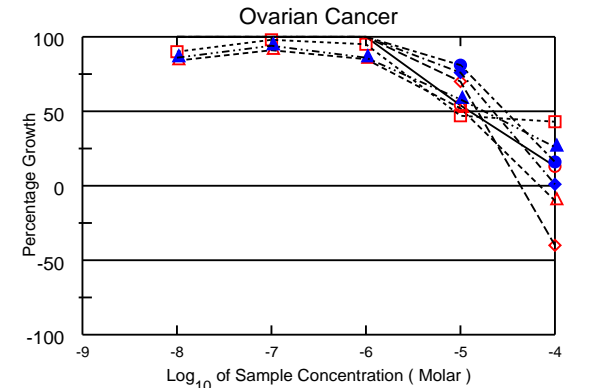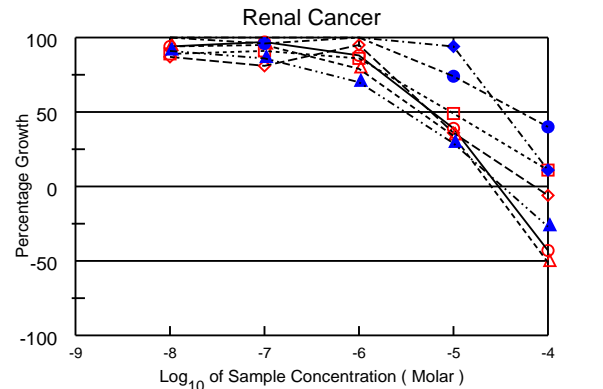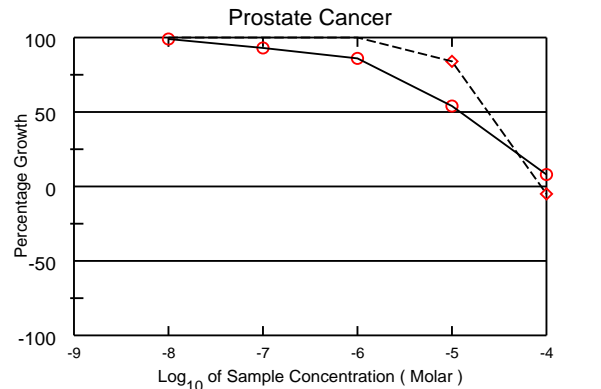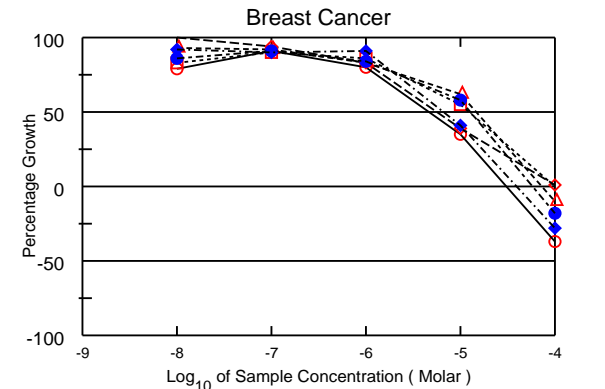

Mean Graphs

Report Date :July 13, 2015

Test Date :February 03, 2014

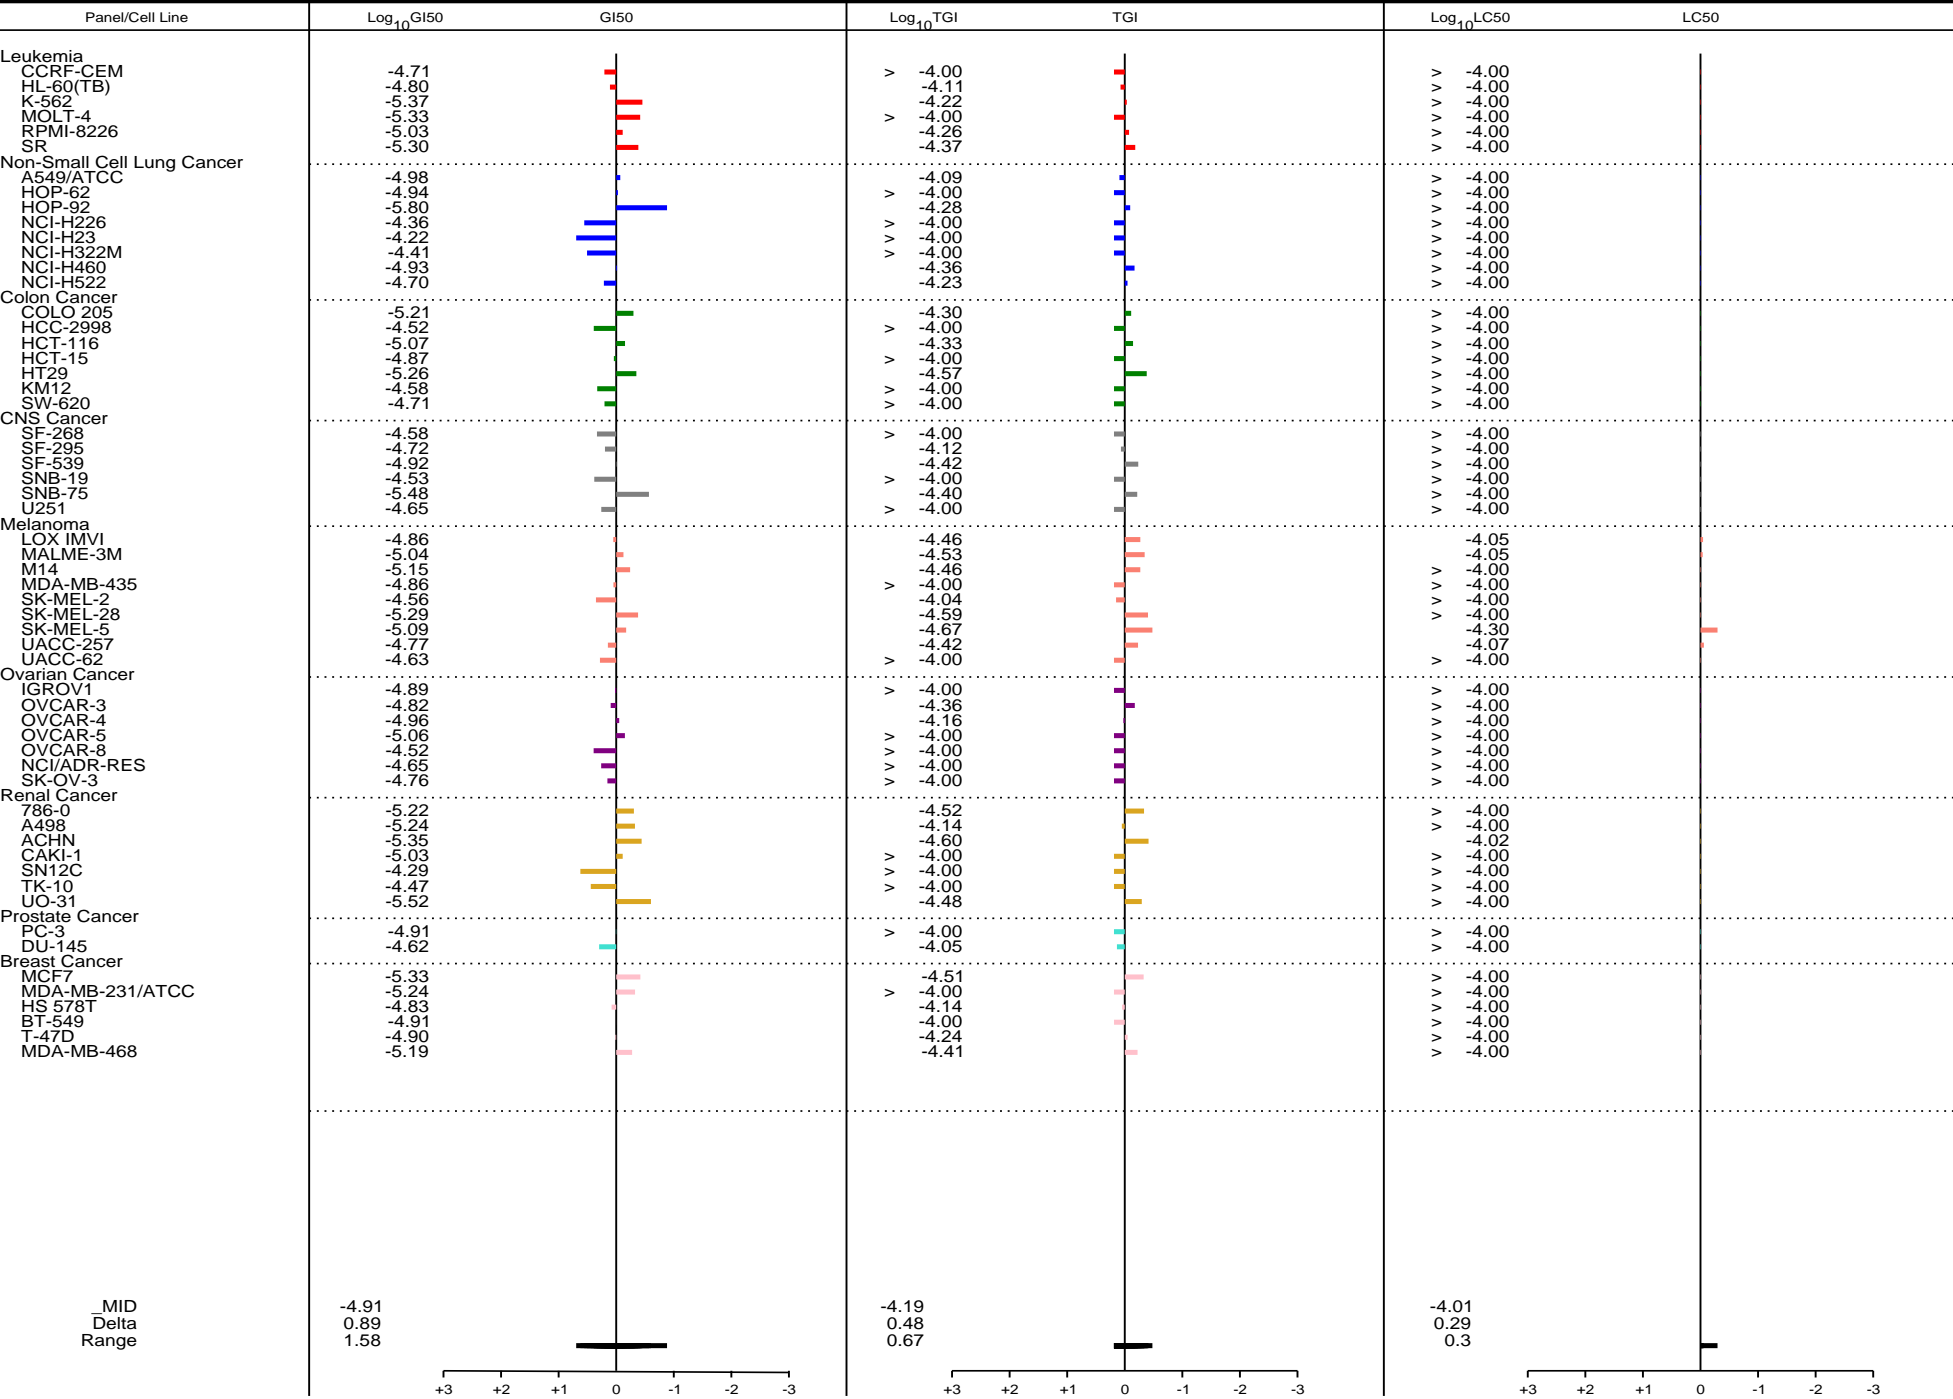

All Cell Lines

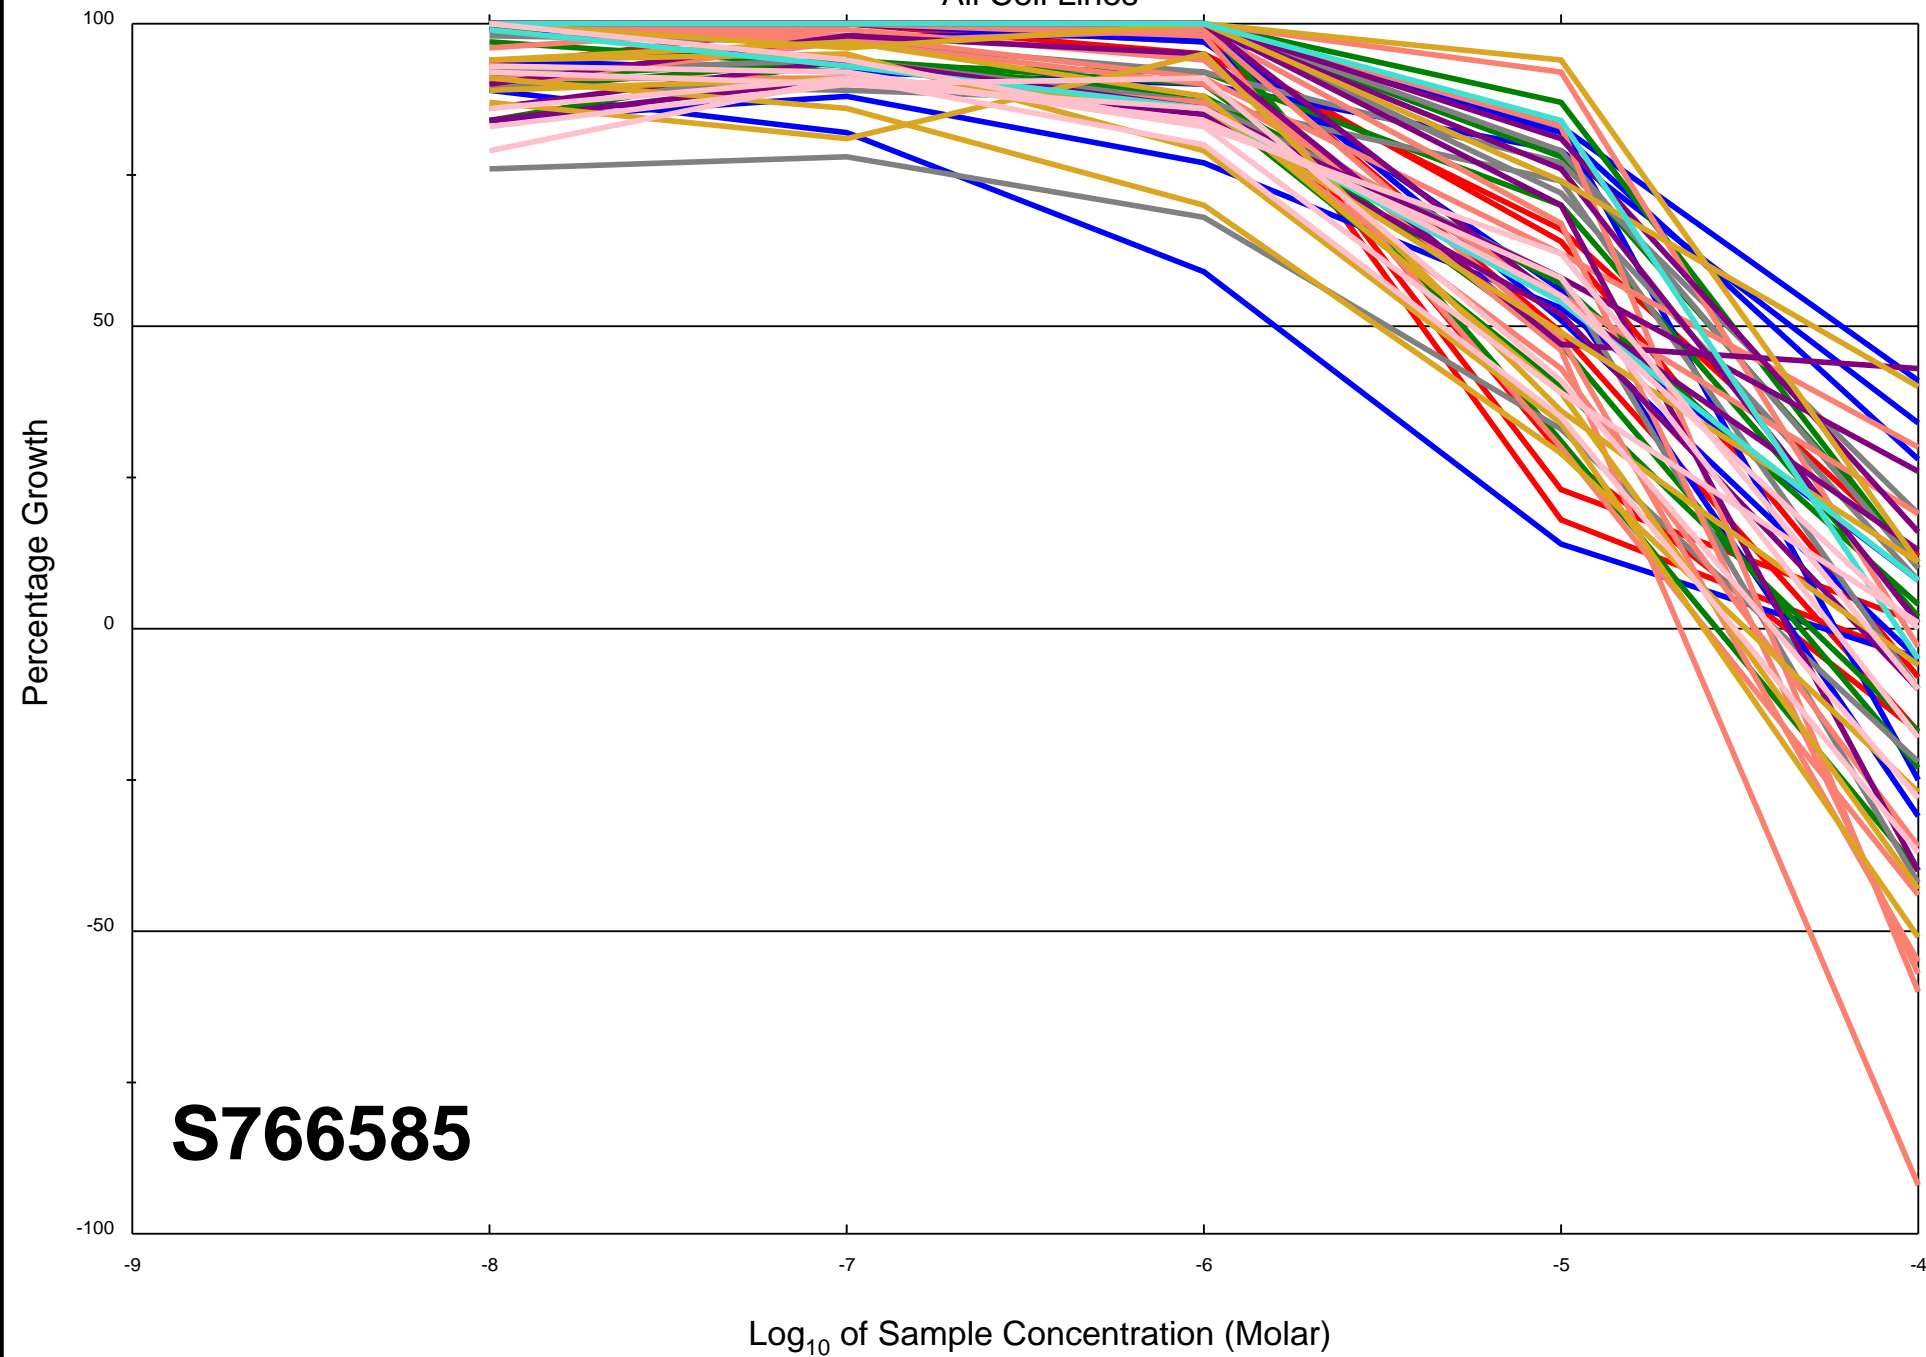

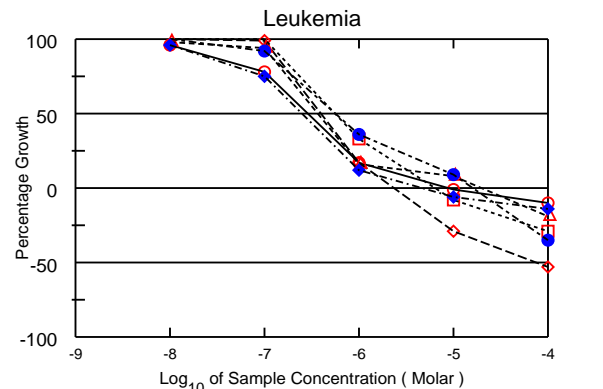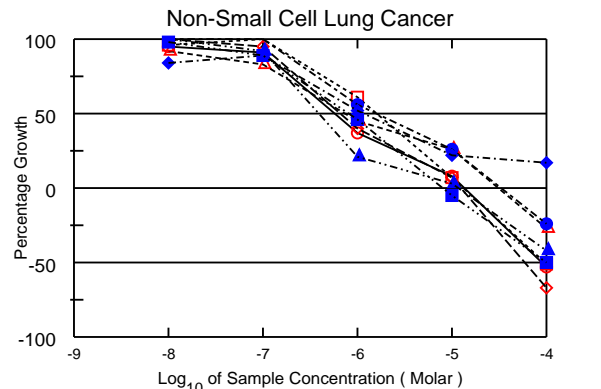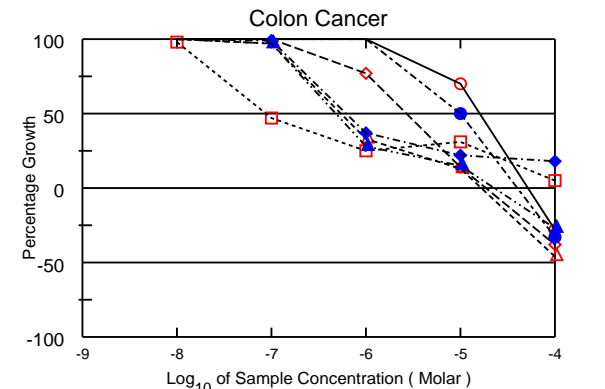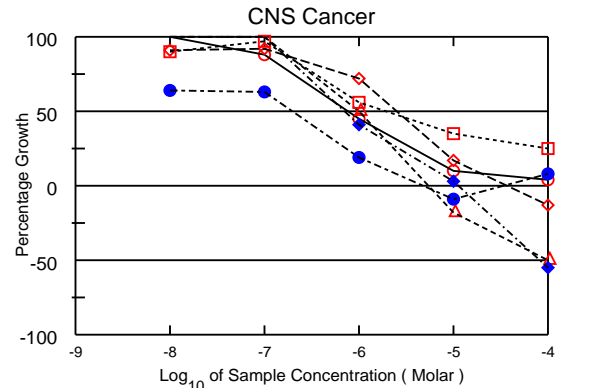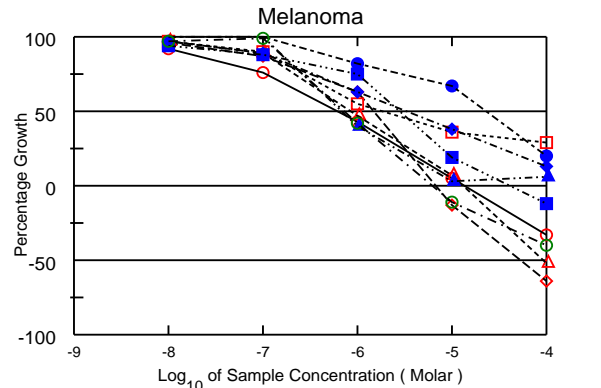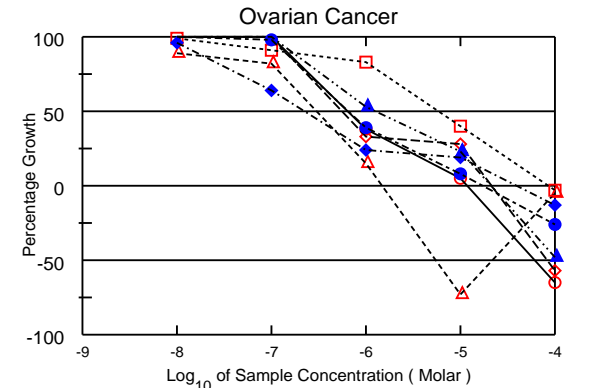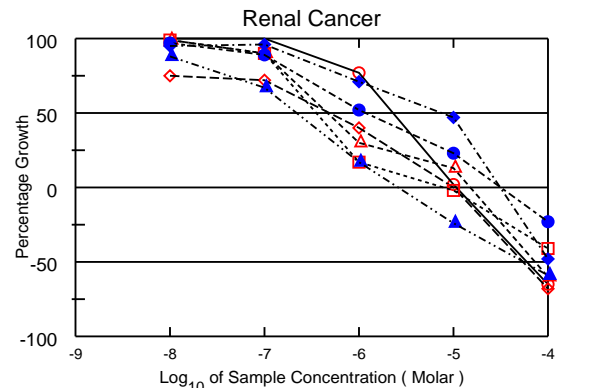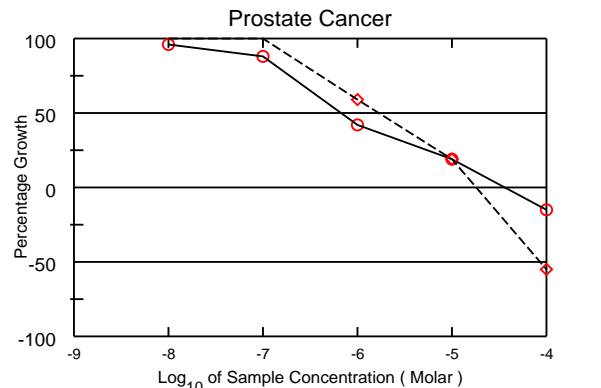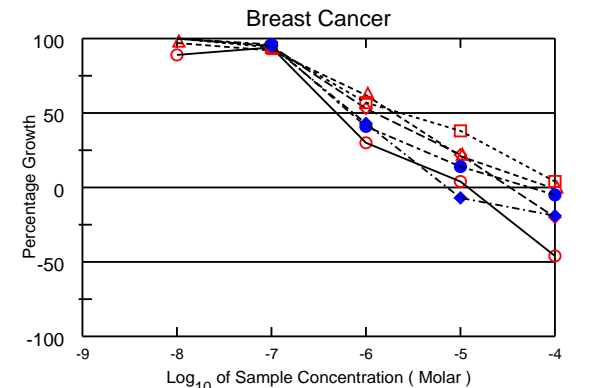

Mean Graphs

Report Date :July 13, 2015

Test Date :February 19, 2013

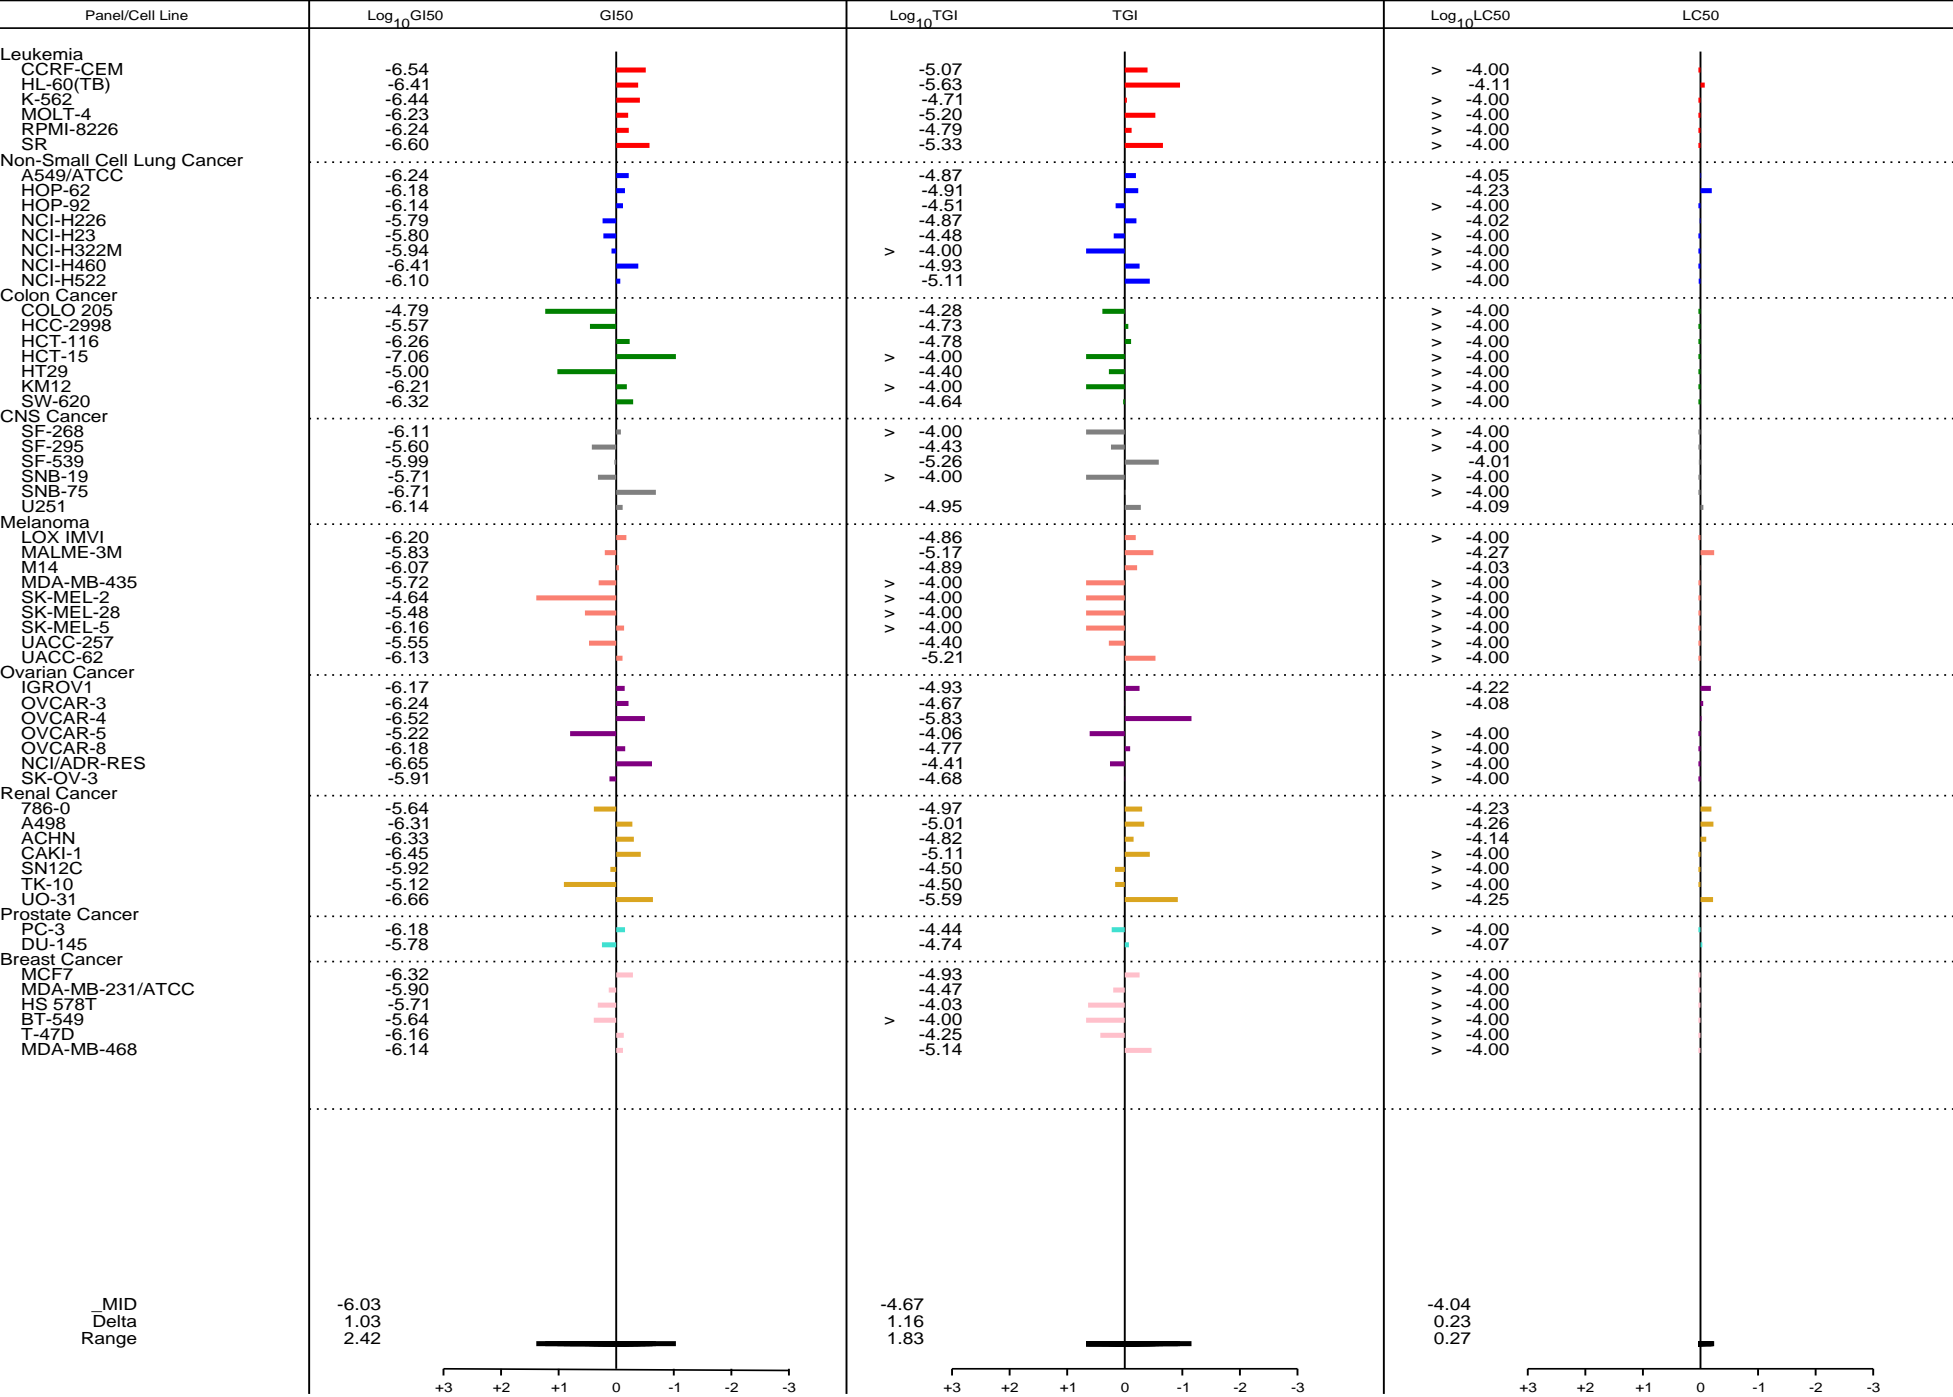

All Cell Lines

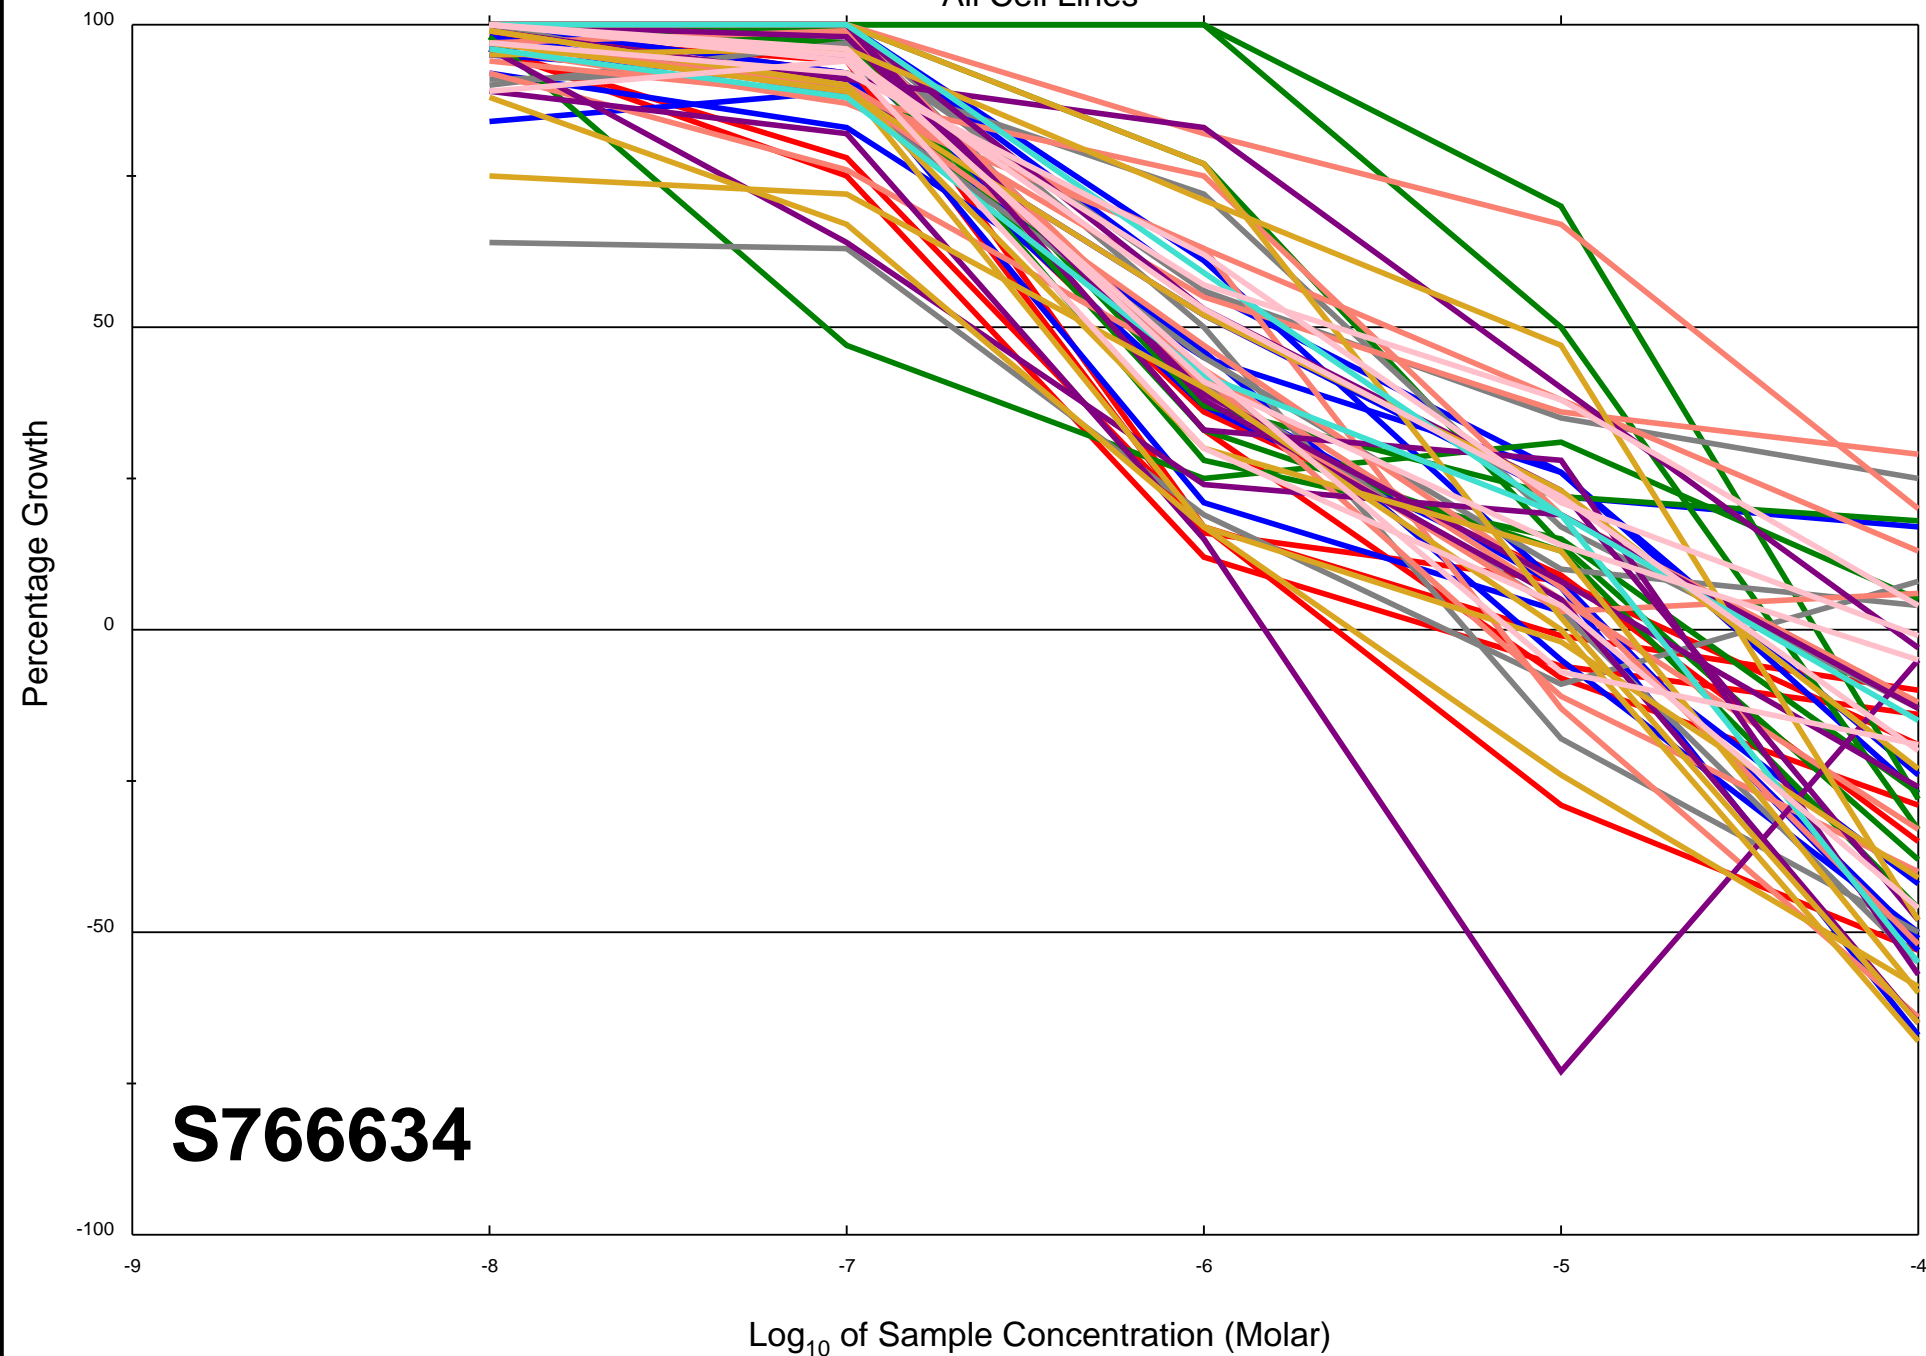

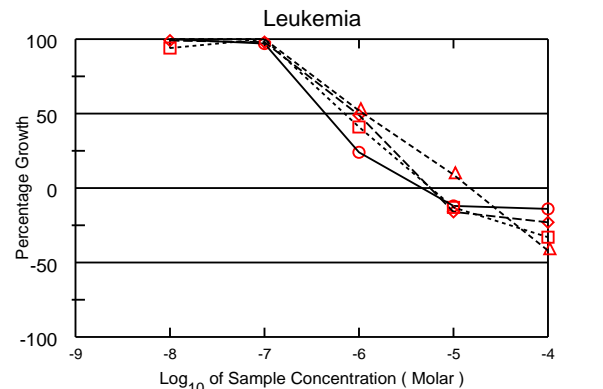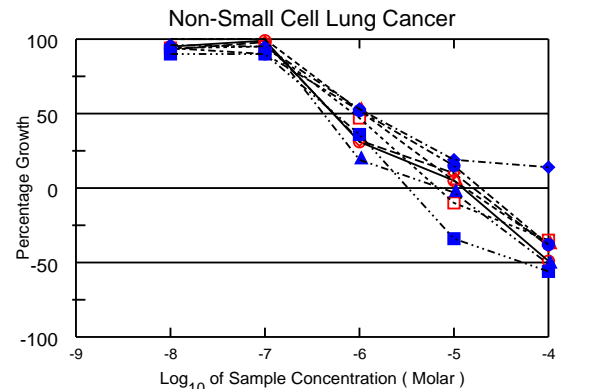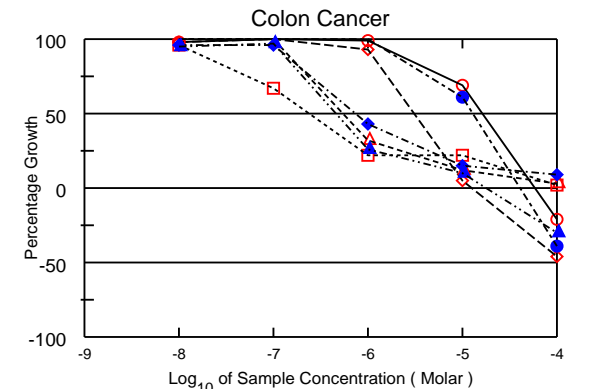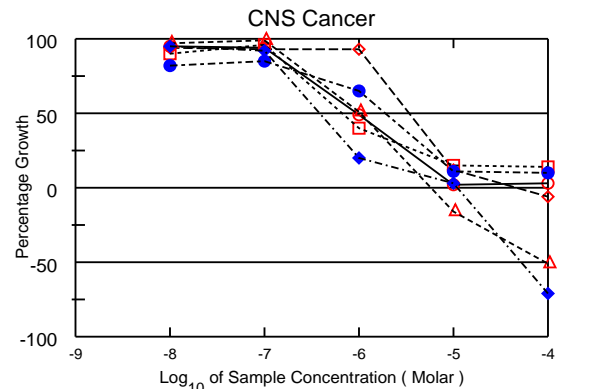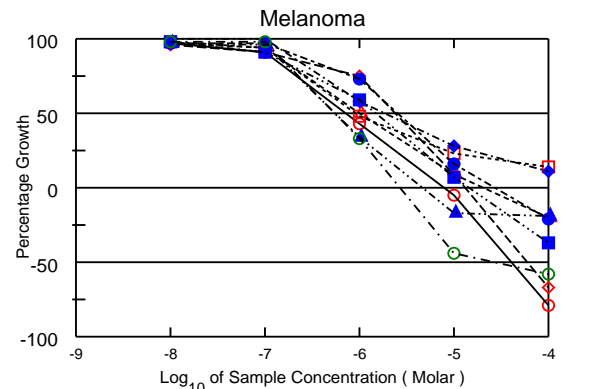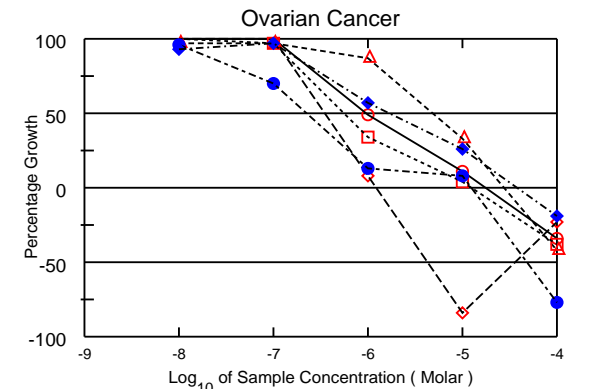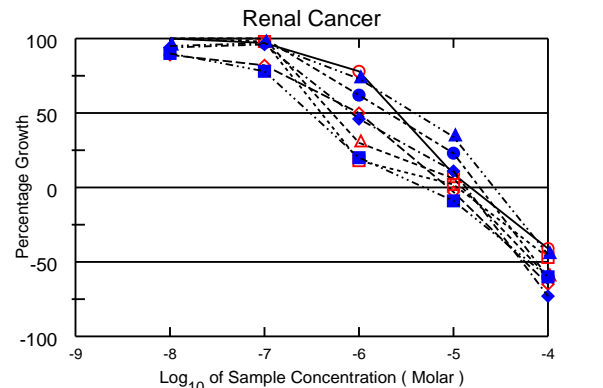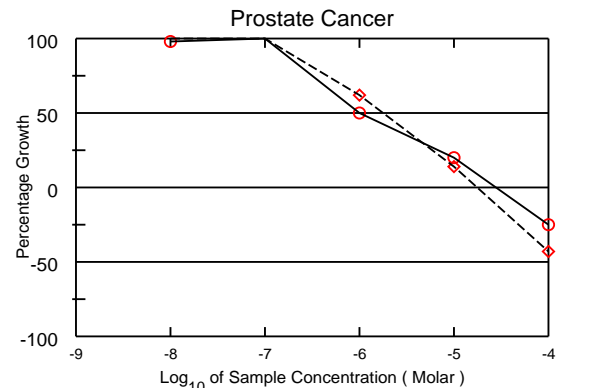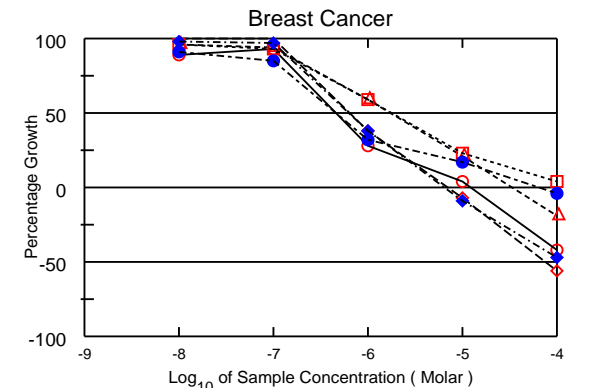

| National Cancer Institute Developmental Therapeutics Program |                        |      | NSC :766634/2              |       | Units :Molar           |       | SSPL :0YQS |                          | EXP. ID :1306RS02 |  |
|--------------------------------------------------------------|------------------------|------|----------------------------|-------|------------------------|-------|------------|--------------------------|-------------------|--|
| Mean Graphs                                                  |                        |      | Report Date :July 13, 2015 |       |                        |       |            | Test Date :June 03, 2013 |                   |  |
| Panel/Cell Line                                              | Log <sub>10</sub> GI50 | GI50 | Log <sub>10</sub> TGI      | TGI   | Log <sub>10</sub> LC50 | LC50  |            |                          |                   |  |
| Leukemia                                                     |                        |      |                            |       |                        |       |            |                          |                   |  |
| CCRF-CEM                                                     | -6.36                  |      | -5.33                      |       | >                      | -4.00 |            |                          |                   |  |
| MOLT-4                                                       | -6.02                  |      | -5.25                      |       | >                      | -4.00 |            |                          |                   |  |
| RPMI-8226                                                    | -5.96                  |      | -4.82                      |       | >                      | -4.00 |            |                          |                   |  |
| SR                                                           | -6.15                  |      | -5.24                      |       | >                      | -4.00 |            |                          |                   |  |
| Non-Small Cell Lung Cancer                                   |                        |      |                            |       |                        |       |            |                          |                   |  |
| A549/ATCC                                                    | -6.28                  |      | -4.91                      |       | >                      | -4.00 |            |                          |                   |  |
| HOP-62                                                       | -6.27                  |      | -4.79                      |       | >                      | -4.00 |            |                          |                   |  |
| HOP-92                                                       | -5.95                  |      | -4.89                      |       | >                      | -4.00 |            |                          |                   |  |
| NCI-H226                                                     | -6.07                  |      | -5.17                      |       | >                      | -4.00 |            |                          |                   |  |
| NCI-H23                                                      | -5.95                  |      | -4.72                      |       | >                      | -4.00 |            |                          |                   |  |
| NCI-H322M                                                    | -5.90                  |      | >                          | -4.00 | >                      | -4.00 |            |                          |                   |  |
| NCI-H460                                                     | -6.39                  |      | -5.14                      |       | >                      | -4.03 |            |                          |                   |  |
| NCI-H522                                                     | -6.26                  |      | -5.49                      |       |                        | -4.28 |            |                          |                   |  |
| Colon Cancer                                                 |                        |      |                            |       |                        |       |            |                          |                   |  |
| COLO 205                                                     | -4.79                  |      | -4.24                      |       | >                      | -4.00 |            |                          |                   |  |
| HCC-2998                                                     | -5.52                  |      | -4.91                      |       | >                      | -4.00 |            |                          |                   |  |
| HCT-116                                                      | -6.27                  |      | -4.00                      |       | >                      | -4.00 |            |                          |                   |  |
| HCT-15                                                       | -6.63                  |      | >                          | -4.00 | >                      | -4.00 |            |                          |                   |  |
| HT29                                                         | -4.89                  |      | -4.39                      |       | >                      | -4.00 |            |                          |                   |  |
| KM12                                                         | -6.14                  |      | >                          | -4.00 | >                      | -4.00 |            |                          |                   |  |
| SW-620                                                       | -6.34                  |      | -4.75                      |       | >                      | -4.00 |            |                          |                   |  |
| CNS Cancer                                                   |                        |      |                            |       |                        |       |            |                          |                   |  |
| SF-268                                                       | -6.03                  |      | >                          | -4.00 | >                      | -4.00 |            |                          |                   |  |
| SF-295                                                       | -5.47                  |      | -4.32                      |       | >                      | -4.00 |            |                          |                   |  |
| SF-539                                                       | -5.99                  |      | -5.24                      |       |                        | -4.02 |            |                          |                   |  |
| SNB-19                                                       | -6.18                  |      | >                          | -4.00 | >                      | -4.00 |            |                          |                   |  |
| SNB-75                                                       | -5.72                  |      | >                          | -4.00 | >                      | -4.00 |            |                          |                   |  |
| U251                                                         | -6.42                  |      | -4.96                      |       |                        | -4.28 |            |                          |                   |  |
| Melanoma                                                     |                        |      |                            |       |                        |       |            |                          |                   |  |
| LOX IMVI                                                     | -6.14                  |      | -5.11                      |       |                        | -4.39 |            |                          |                   |  |
| MALME-3M                                                     | -5.62                  |      | -4.88                      |       |                        | -4.22 |            |                          |                   |  |
| M14                                                          | -6.00                  |      | -4.68                      |       | >                      | -4.00 |            |                          |                   |  |
| MDA-MB-435                                                   | -6.04                  |      | >                          | -4.00 | >                      | -4.00 |            |                          |                   |  |
| SK-MEL-2                                                     | -5.60                  |      | -4.58                      |       | >                      | -4.00 |            |                          |                   |  |
| SK-MEL-28                                                    | -5.72                  |      | >                          | -4.00 | >                      | -4.00 |            |                          |                   |  |
| SK-MEL-5                                                     | -6.26                  |      | -5.34                      |       | >                      | -4.00 |            |                          |                   |  |
| UACC-257                                                     | -5.82                  |      | -4.84                      |       | >                      | -4.00 |            |                          |                   |  |
| UACC-62                                                      | -6.27                  |      | -5.57                      |       |                        | -4.56 |            |                          |                   |  |
| Ovarian Cancer                                               |                        |      |                            |       |                        |       |            |                          |                   |  |
| IGROV1                                                       | -6.01                  |      | -4.75                      |       | >                      | -4.00 |            |                          |                   |  |
| OVCAR-4                                                      | -6.45                  |      | -5.91                      |       |                        |       |            |                          |                   |  |
| OVCAR-5                                                      | -5.32                  |      | -4.56                      |       | >                      | -4.00 |            |                          |                   |  |
| OVCAR-8                                                      | -6.25                  |      | -4.91                      |       | >                      | -4.00 |            |                          |                   |  |
| NCI/ADR-RES                                                  | -6.65                  |      | -4.90                      |       |                        | -4.31 |            |                          |                   |  |
| SK-OV-3                                                      | -5.77                  |      | -4.43                      |       | >                      | -4.00 |            |                          |                   |  |
| Renal Cancer                                                 |                        |      |                            |       |                        |       |            |                          |                   |  |
| 786-0                                                        | -5.60                  |      | -4.83                      |       | >                      | -4.00 |            |                          |                   |  |
| A498                                                         | -6.01                  |      | -5.06                      |       |                        | -4.24 |            |                          |                   |  |
| ACHN                                                         | -6.28                  |      | -4.90                      |       |                        | -4.15 |            |                          |                   |  |
| CAKI-1                                                       | -6.40                  |      | -4.96                      |       | >                      | -4.00 |            |                          |                   |  |
| RXF 393                                                      | -5.69                  |      | -4.72                      |       |                        | -4.12 |            |                          |                   |  |
| SN12C                                                        | -6.09                  |      | -4.87                      |       |                        | -4.27 |            |                          |                   |  |
| TK-10                                                        | -5.41                  |      | -4.57                      |       | >                      | -4.00 |            |                          |                   |  |
| UO-31                                                        | -6.51                  |      | -5.30                      |       |                        | -4.20 |            |                          |                   |  |
| Prostate Cancer                                              |                        |      |                            |       |                        |       |            |                          |                   |  |
| PC-3                                                         | -6.01                  |      | -4.55                      |       | >                      | -4.00 |            |                          |                   |  |
| DU-145                                                       | -5.75                  |      | -4.76                      |       | >                      | -4.00 |            |                          |                   |  |
| Breast Cancer                                                |                        |      |                            |       |                        |       |            |                          |                   |  |
| MCF7                                                         | -6.33                  |      | -4.90                      |       | >                      | -4.00 |            |                          |                   |  |
| MDA-MB-231/ATCC                                              | -6.19                  |      | -5.16                      |       |                        | -4.13 |            |                          |                   |  |
| HS 578T                                                      | -5.77                  |      | -4.48                      |       | >                      | -4.00 |            |                          |                   |  |
| BT-549                                                       | -5.75                  |      | >                          | -4.00 | >                      | -4.00 |            |                          |                   |  |
| T-47D                                                        | -6.34                  |      | -4.19                      |       | >                      | -4.00 |            |                          |                   |  |
| MDA-MB-468                                                   | -6.20                  |      | -5.19                      |       | >                      | -4.00 |            |                          |                   |  |

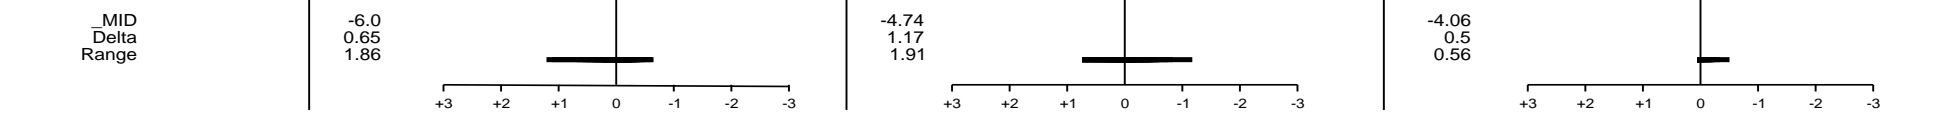

All Cell Lines

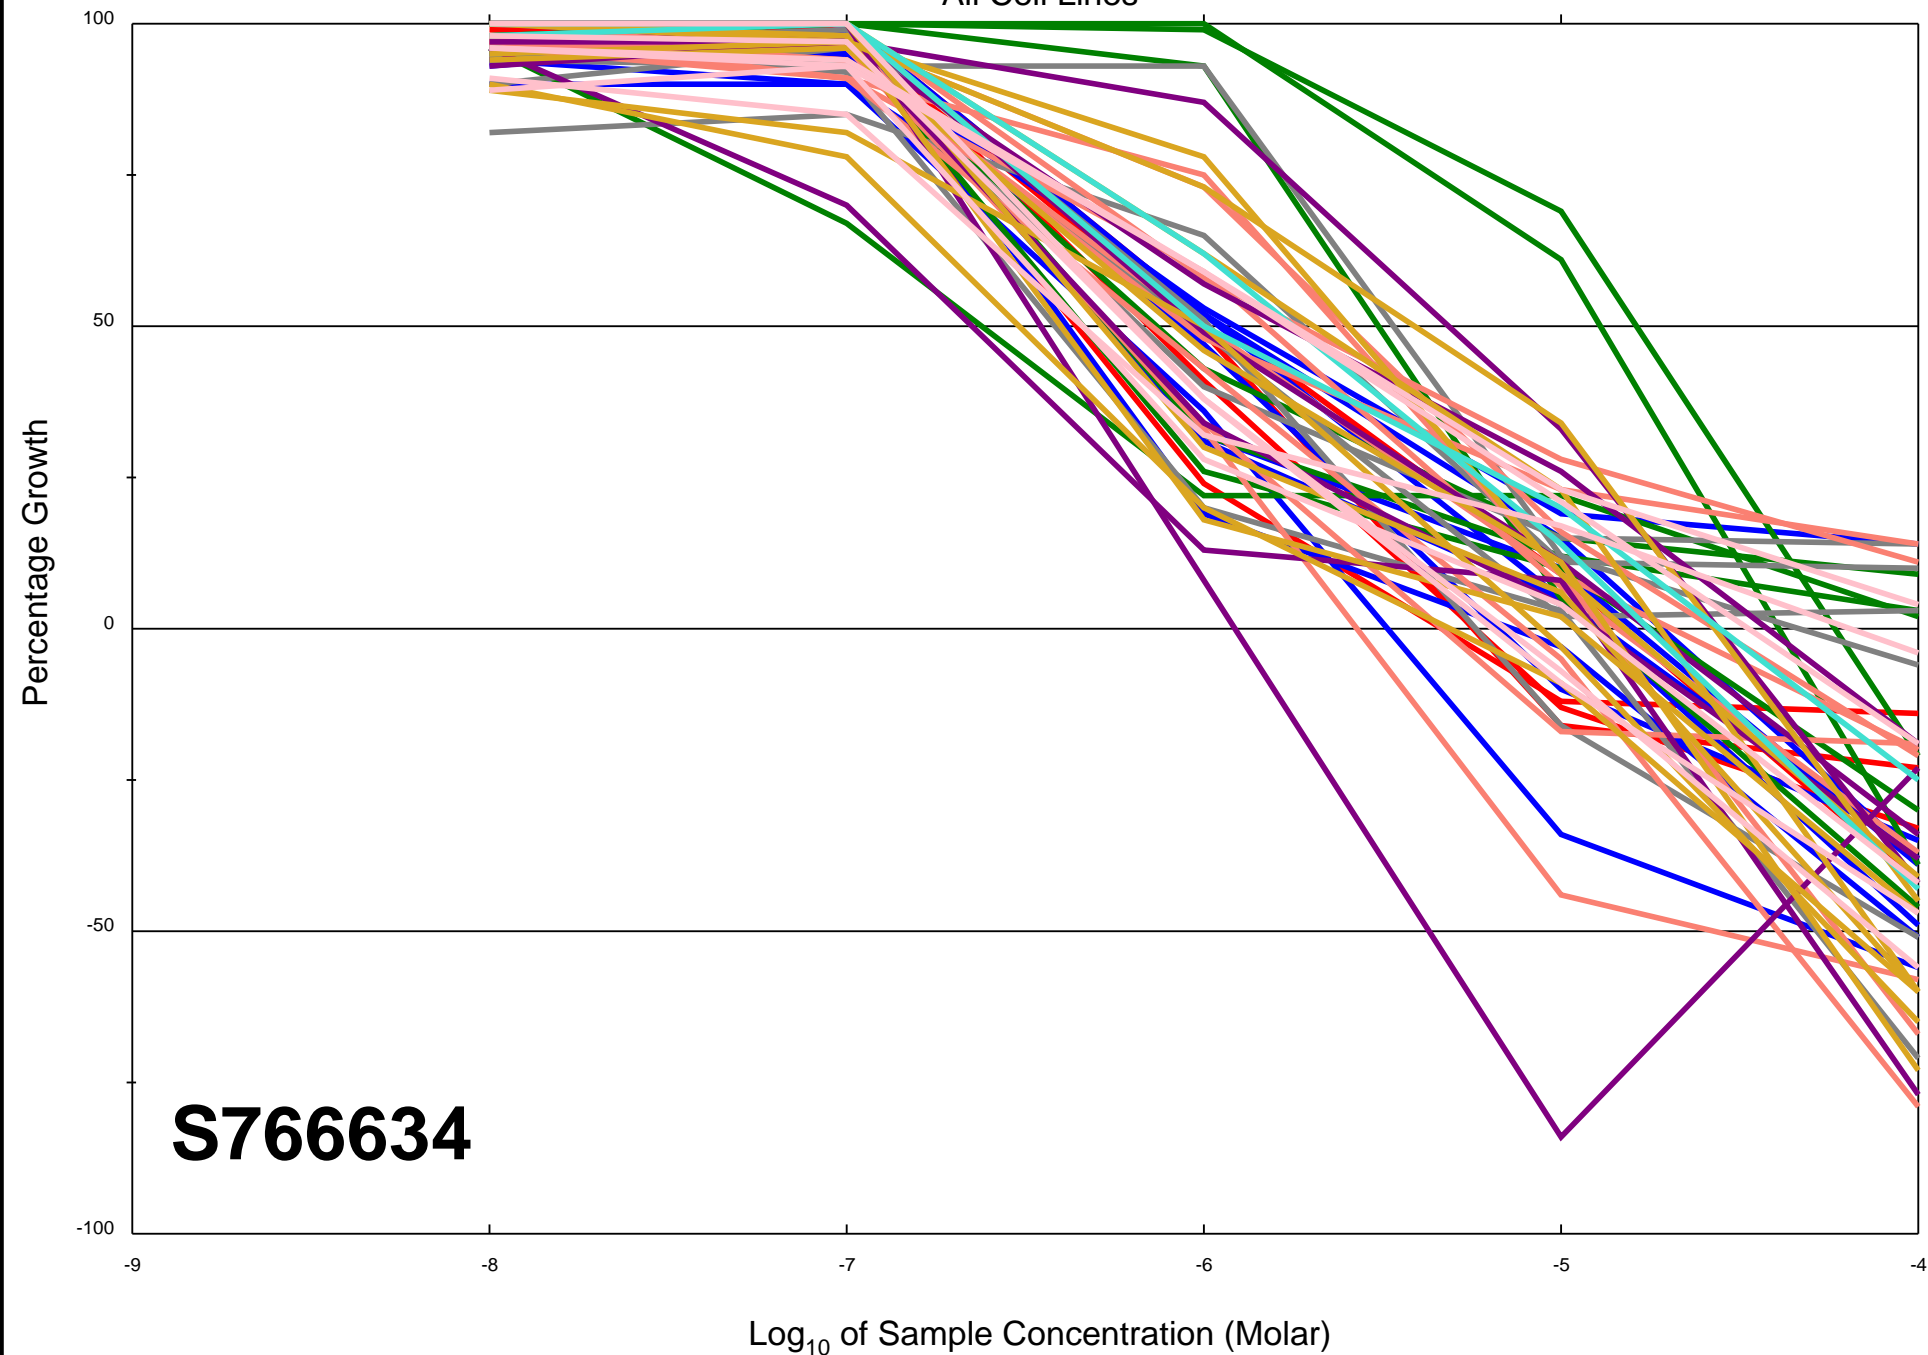

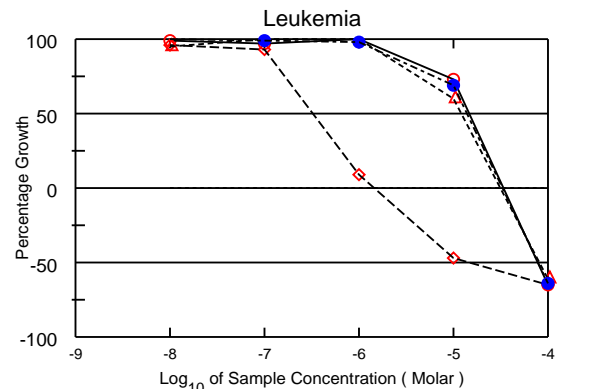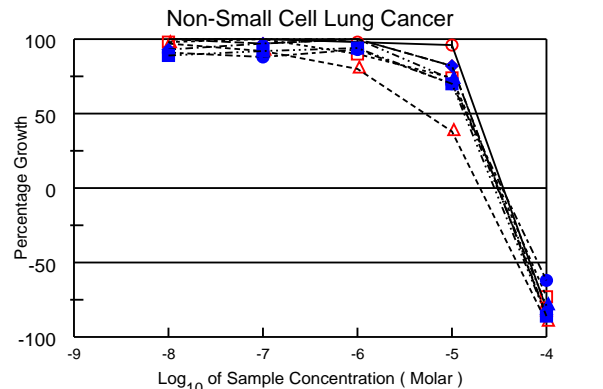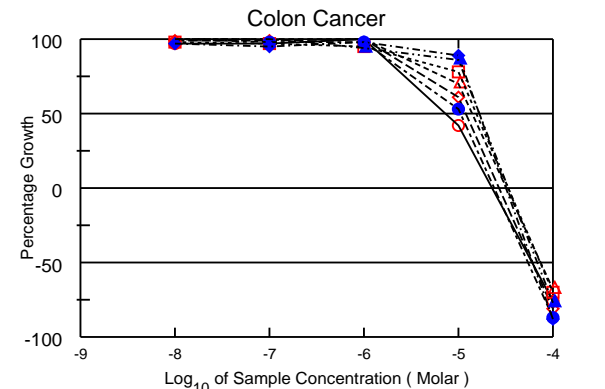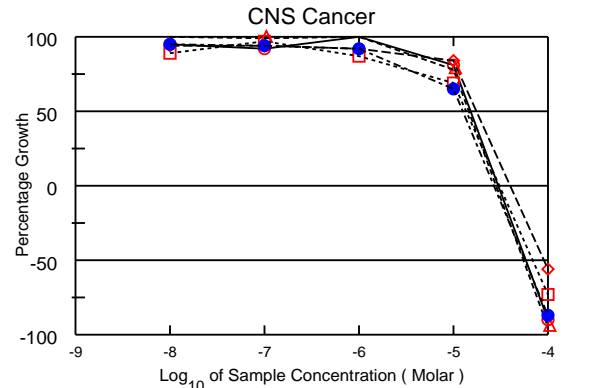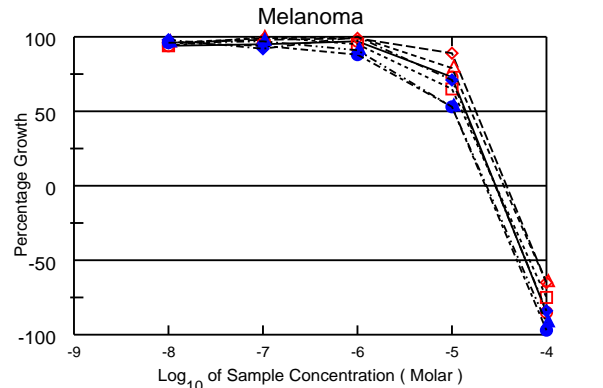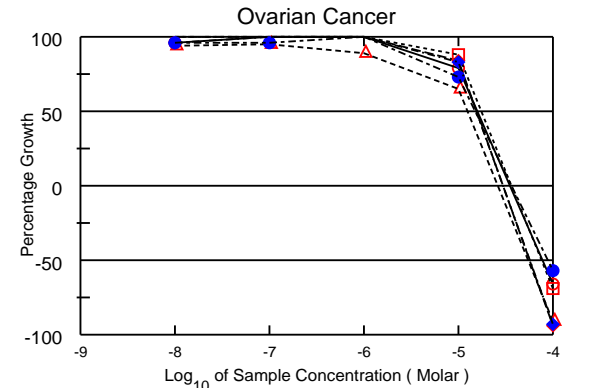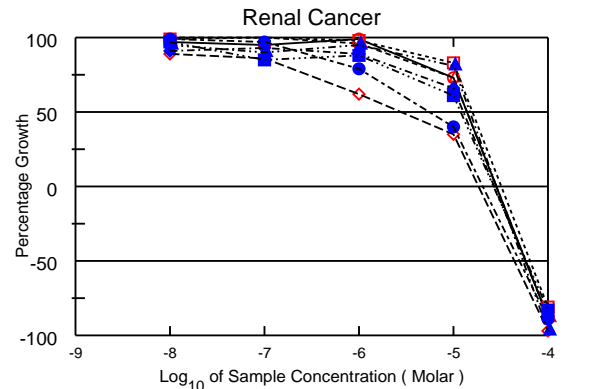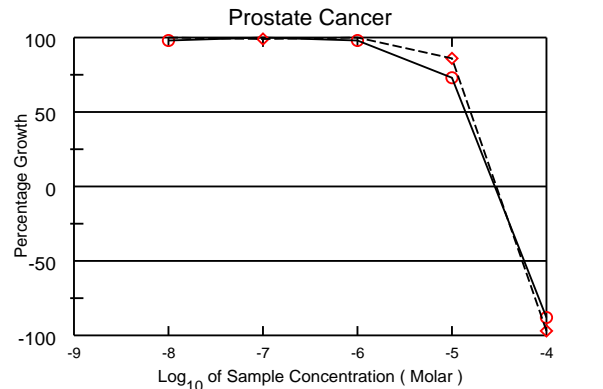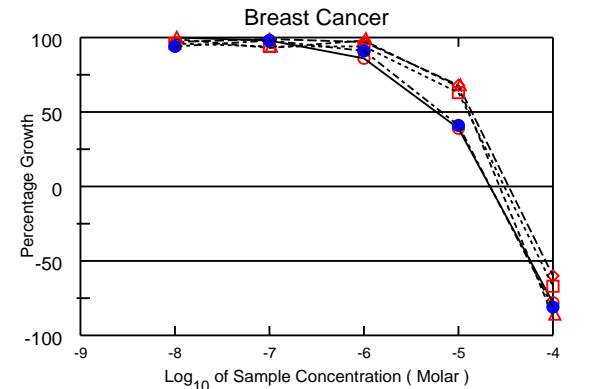

Test Date :February 25, 2013

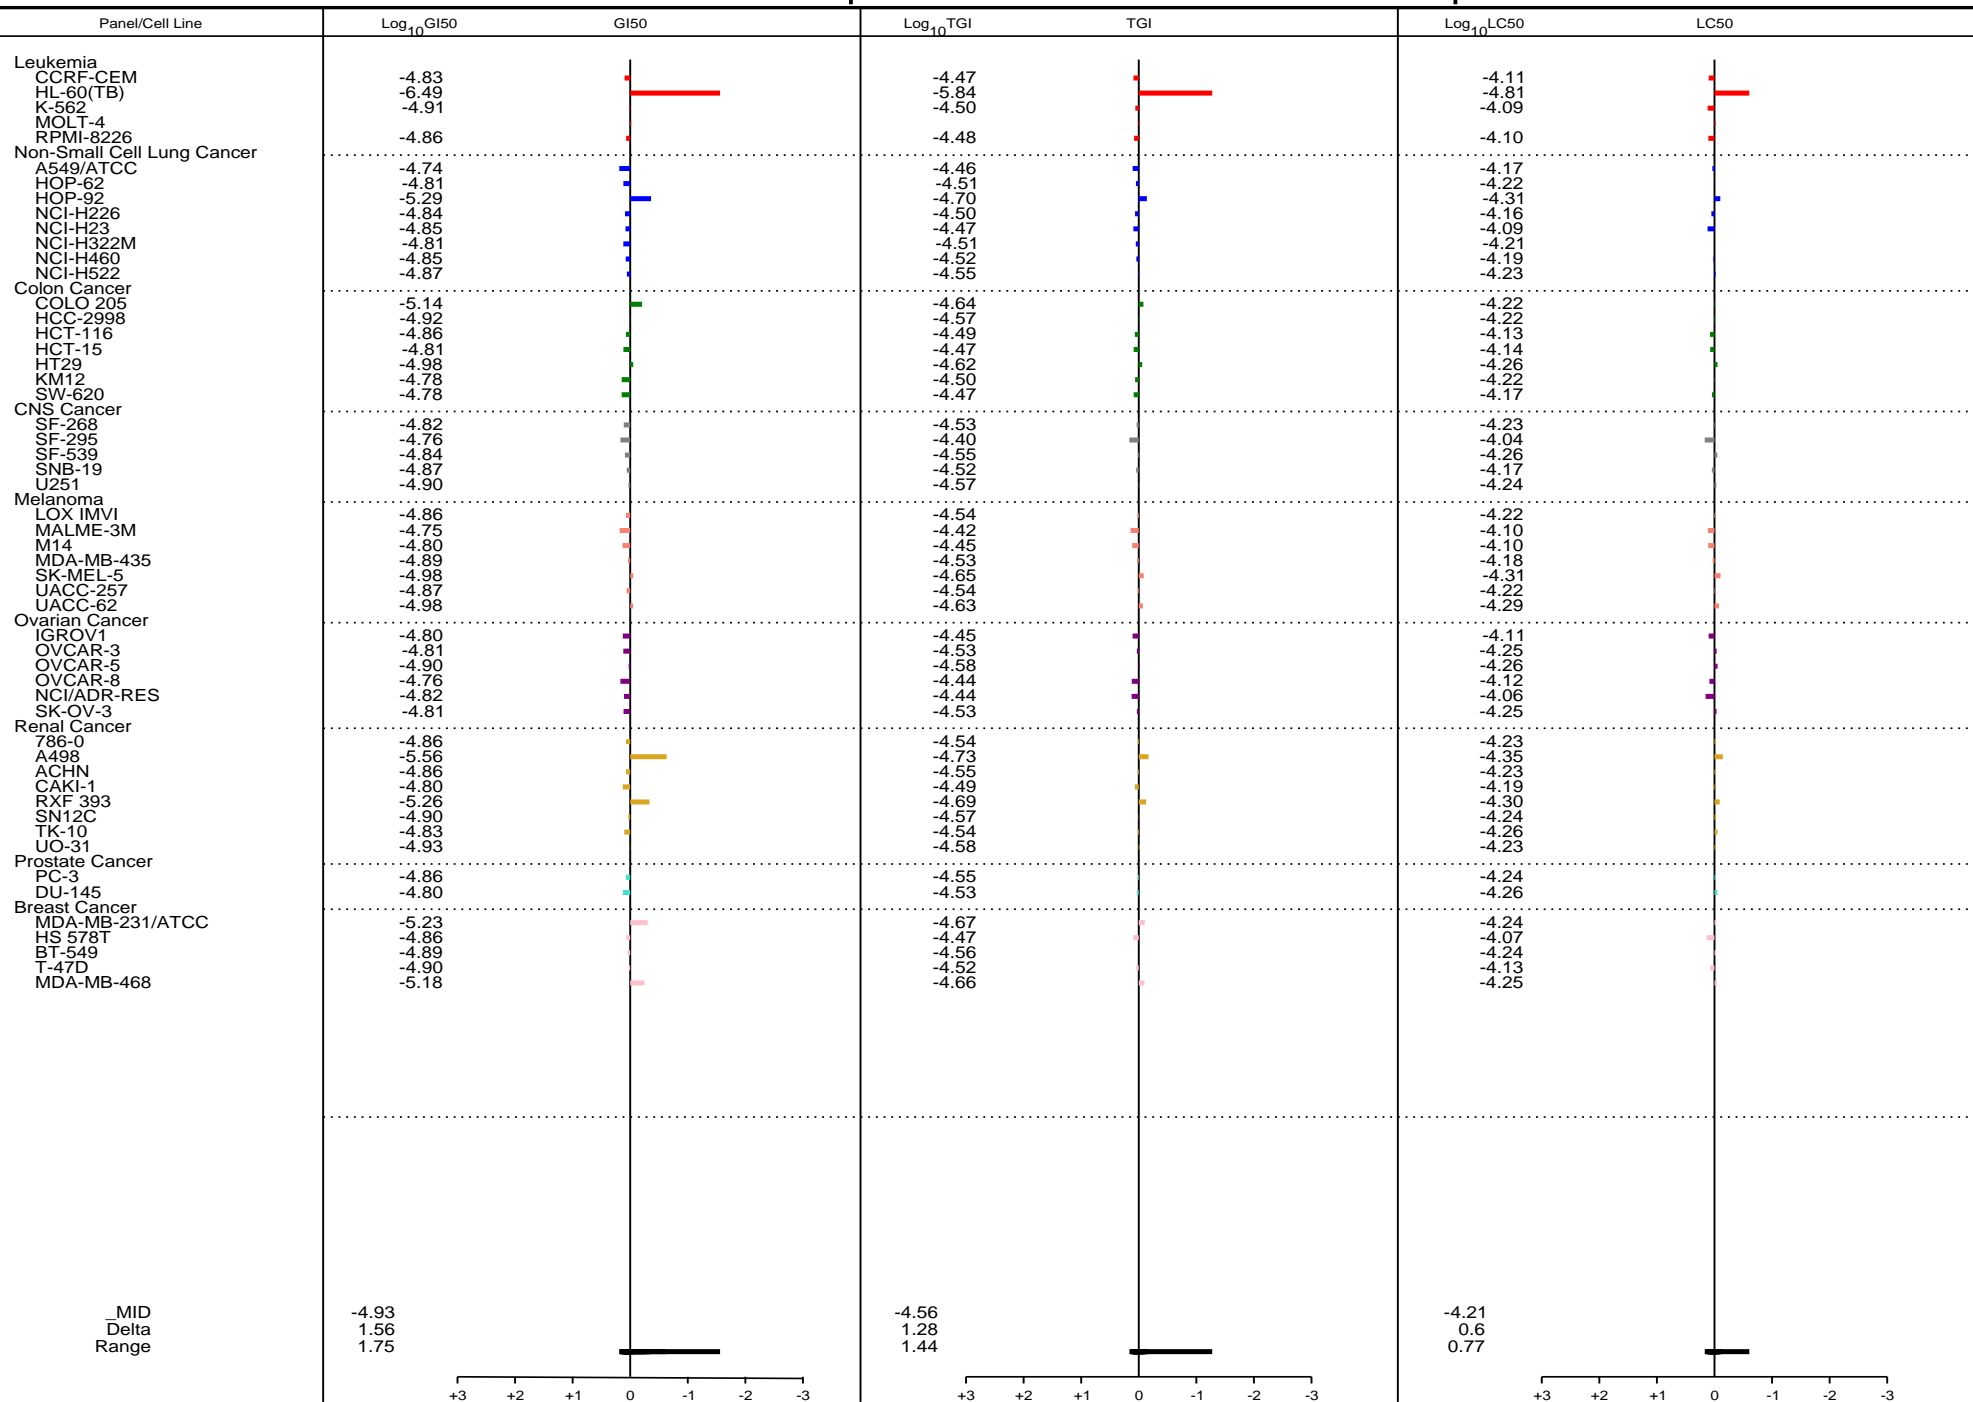

All Cell Lines

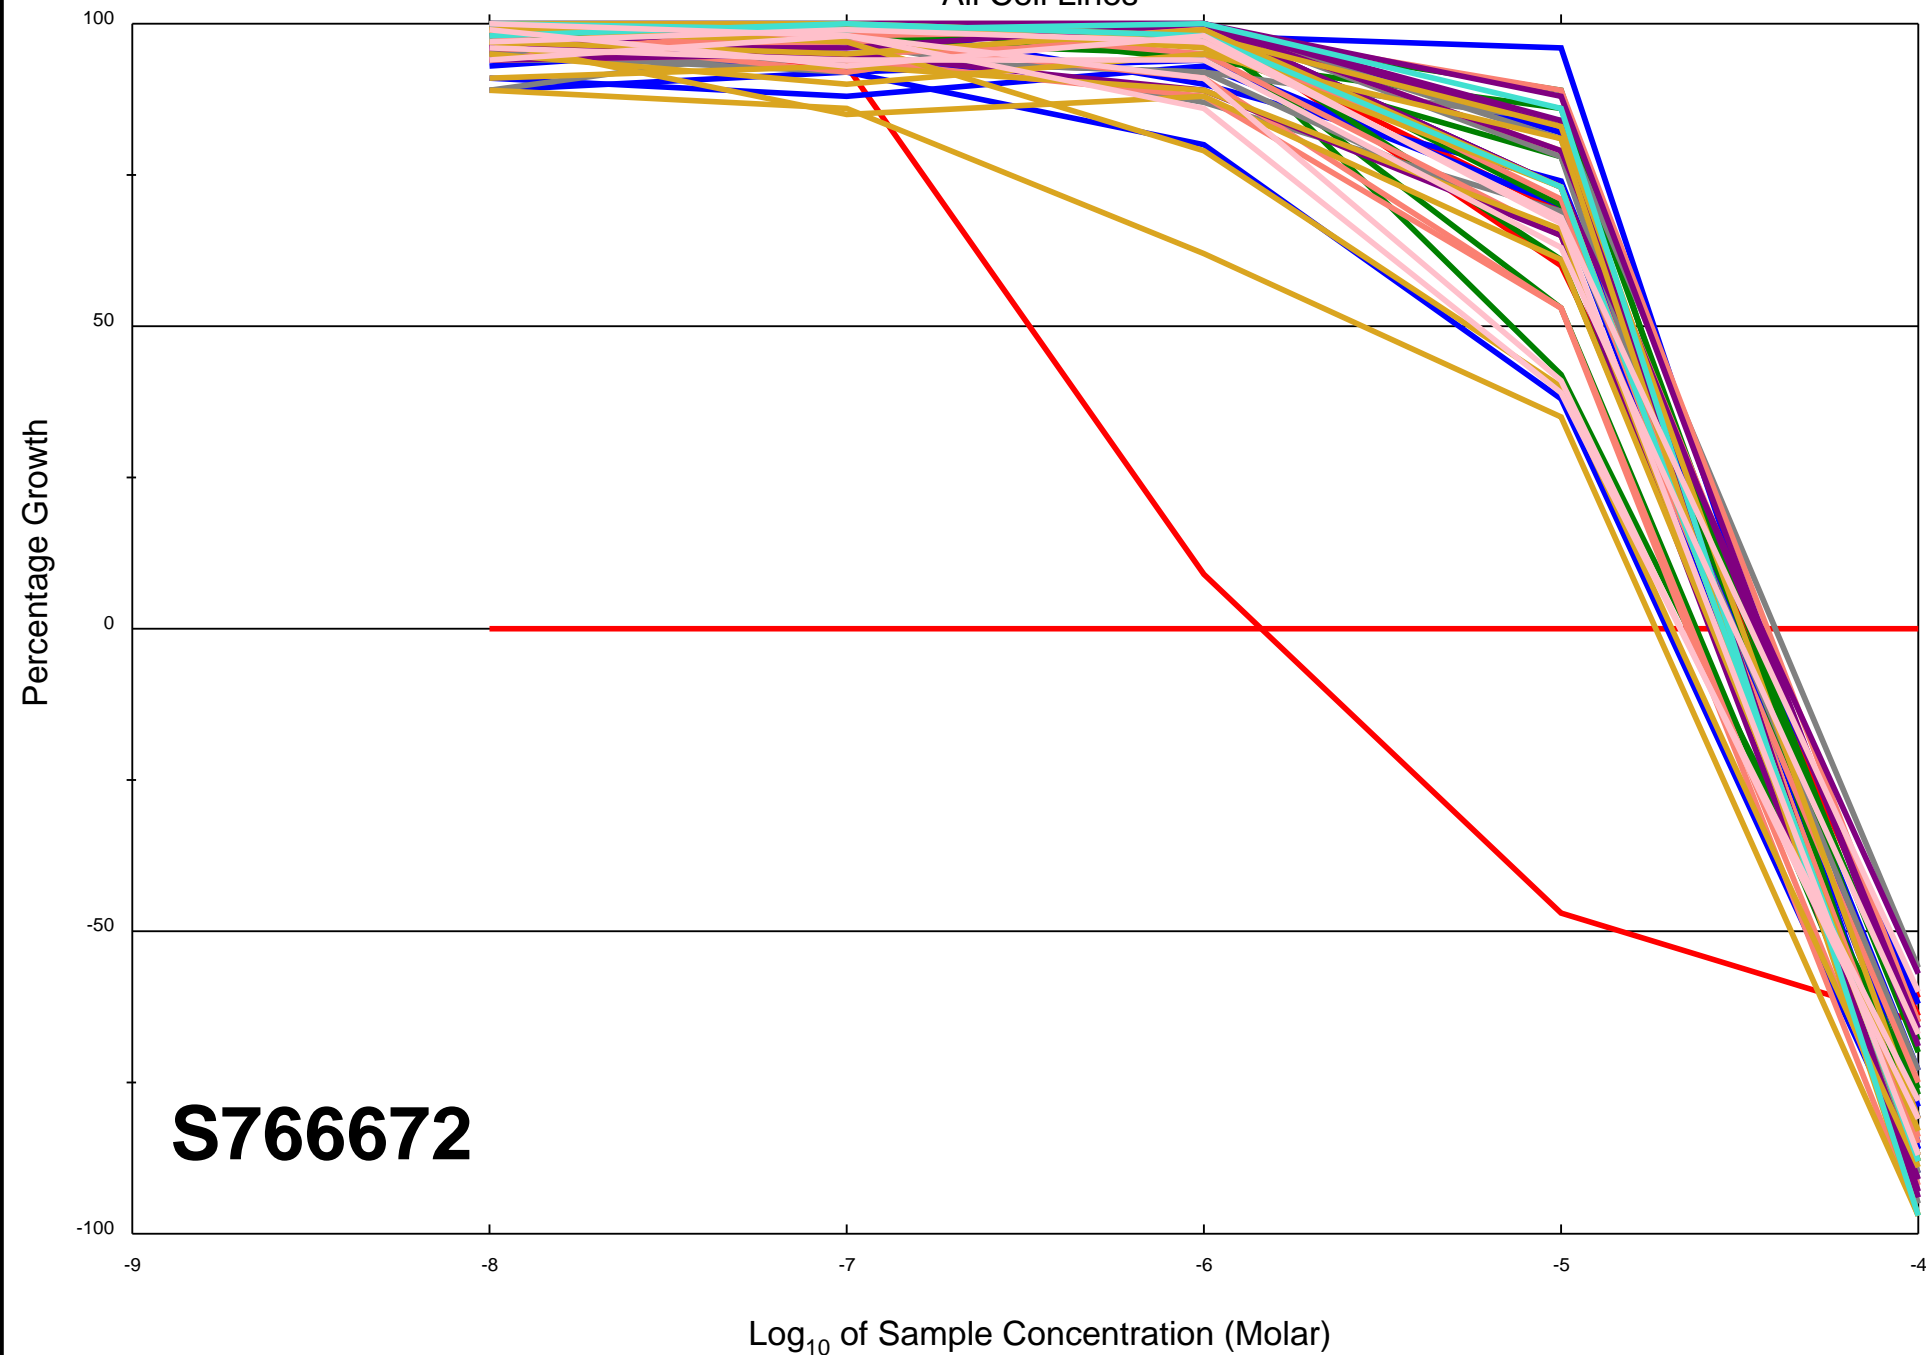

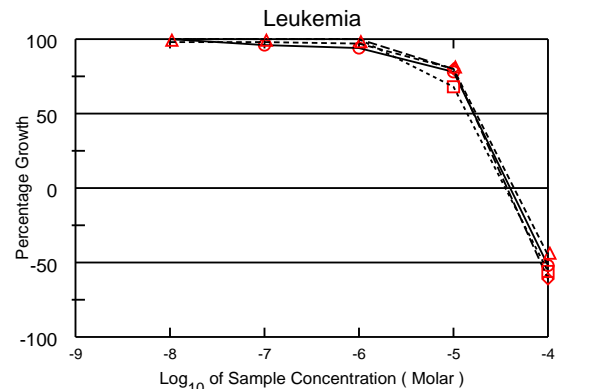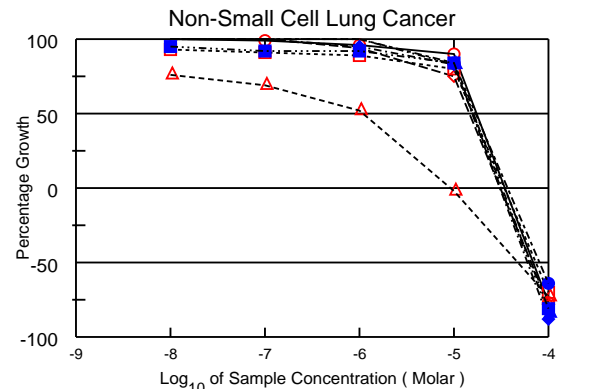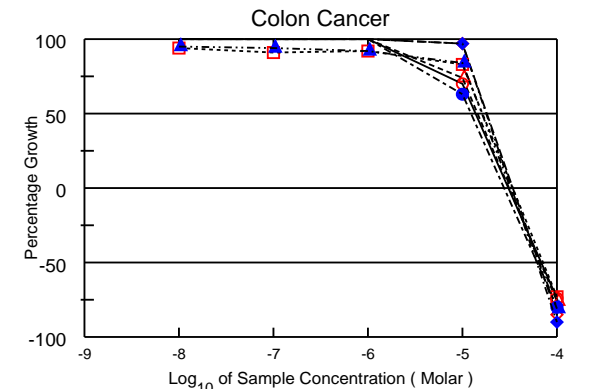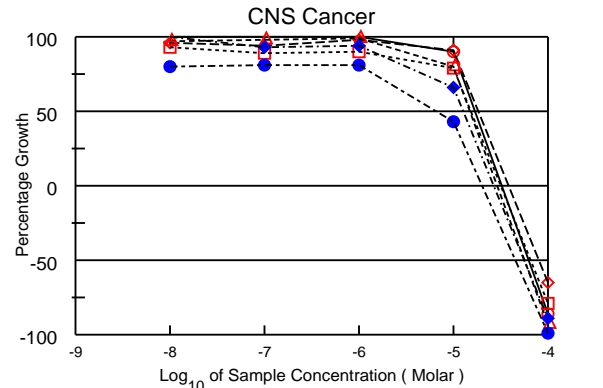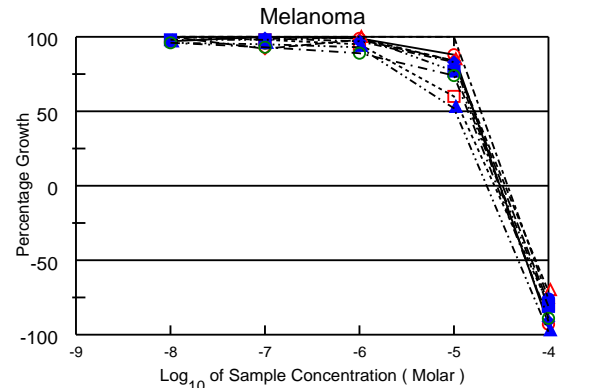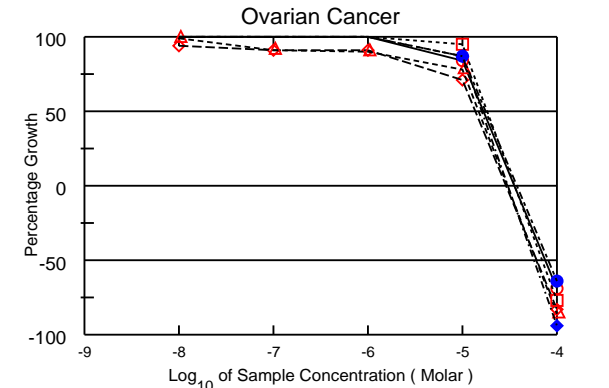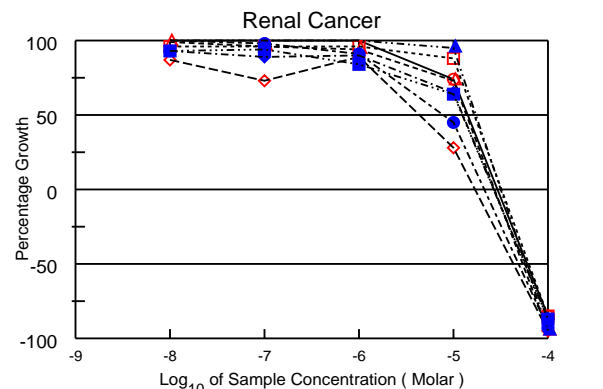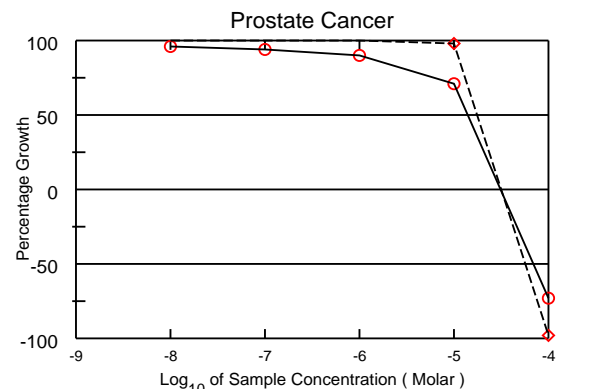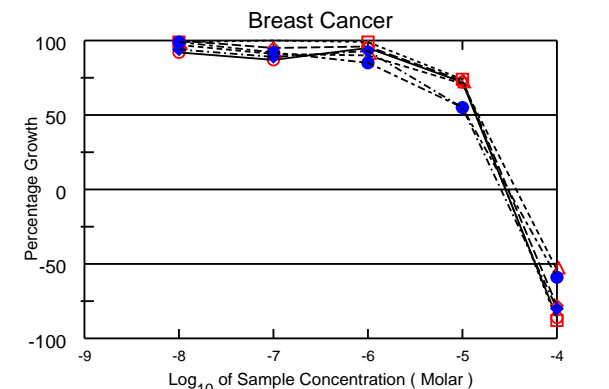

Mean Graphs

Report Date :July 13, 2015

Test Date :June 03, 2013

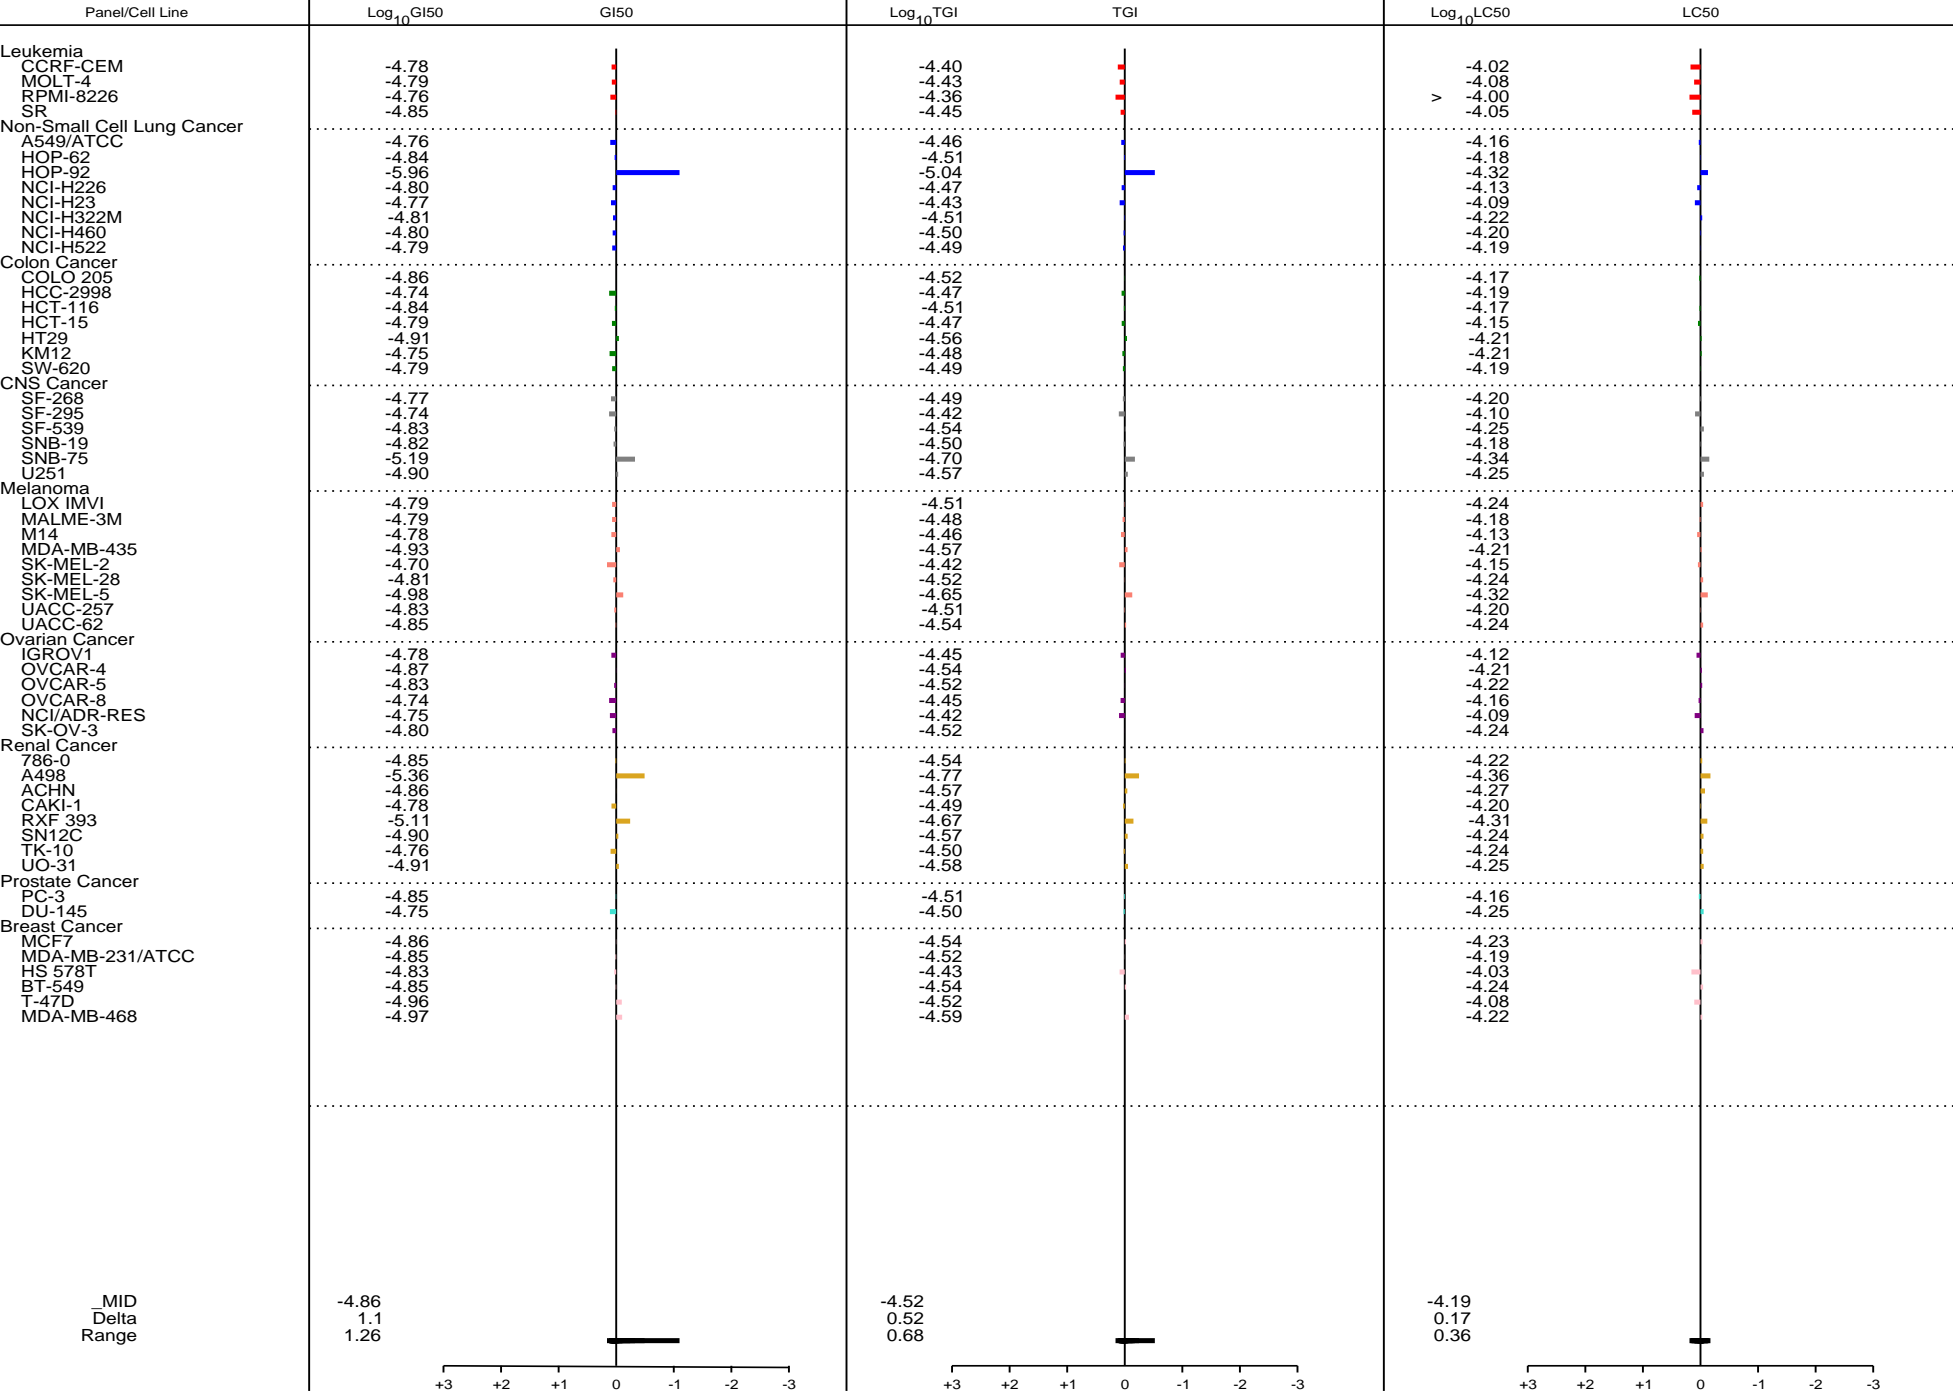

All Cell Lines

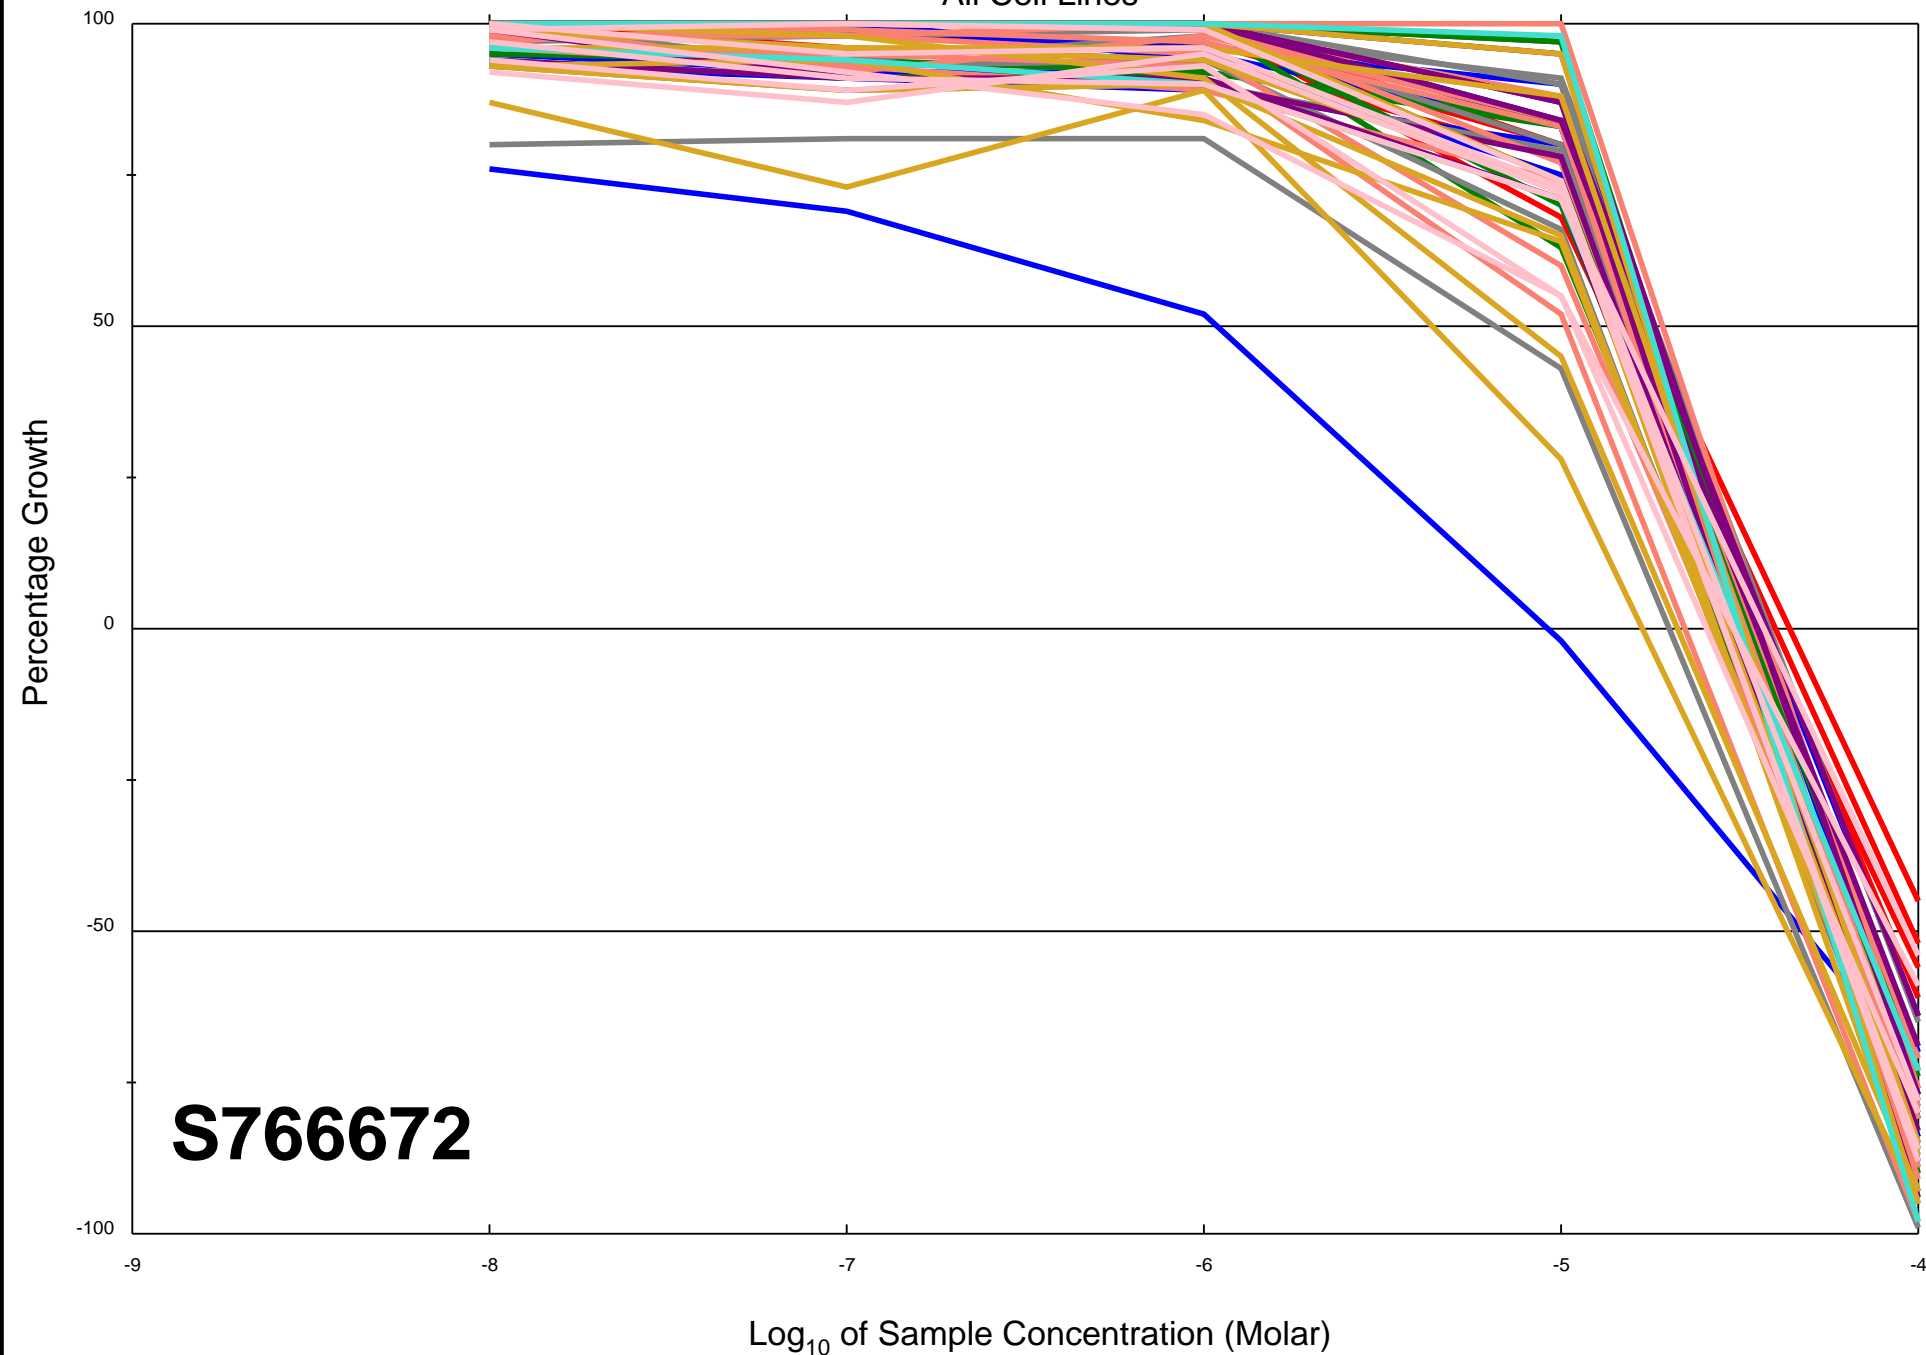

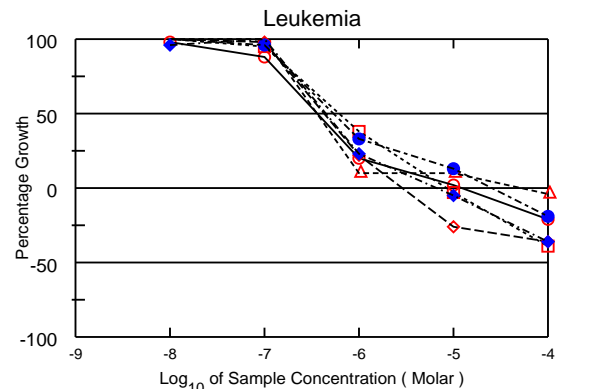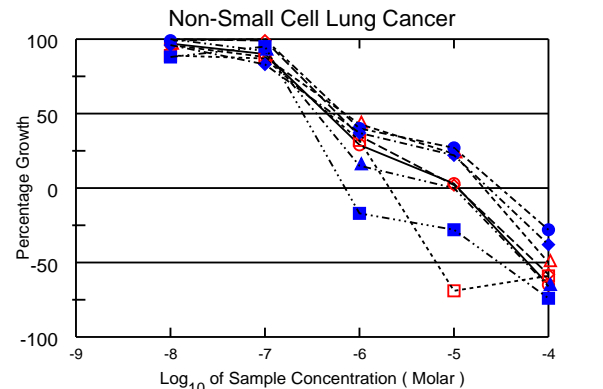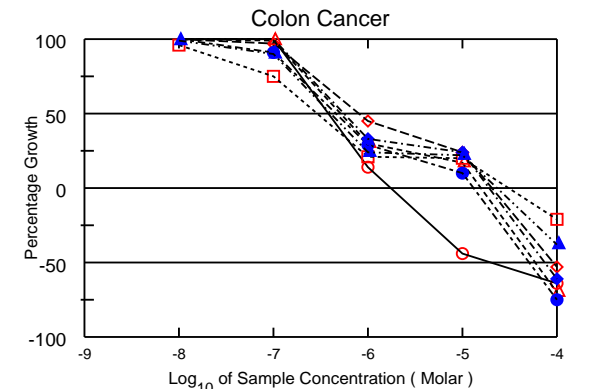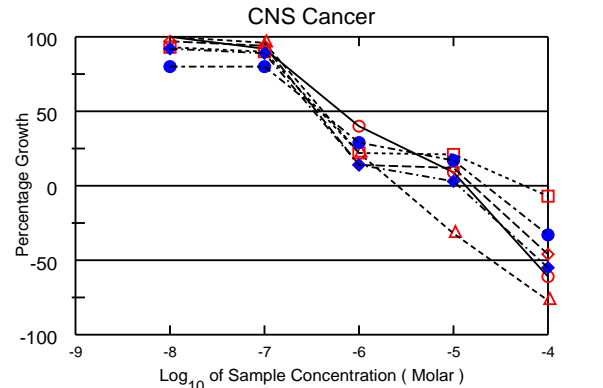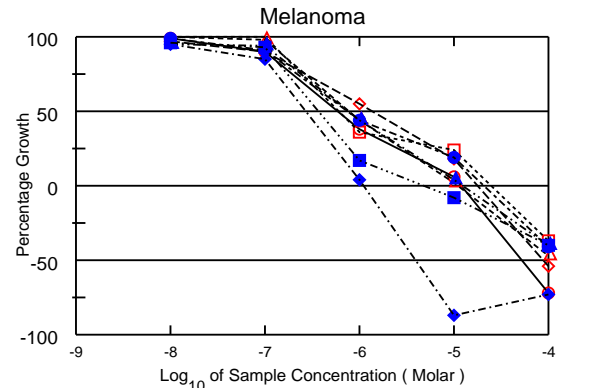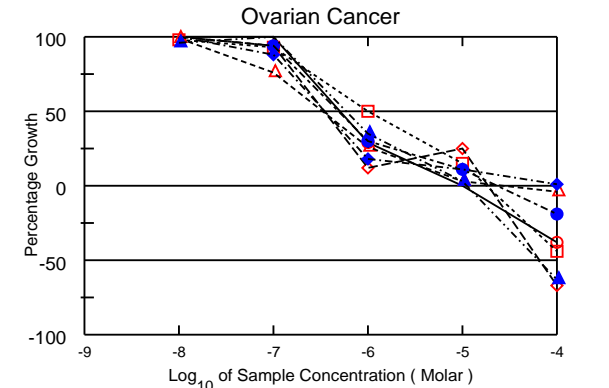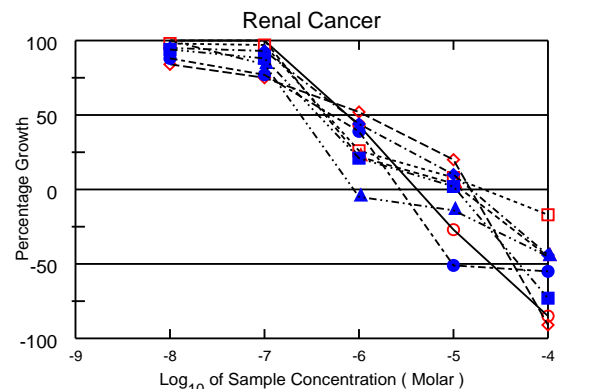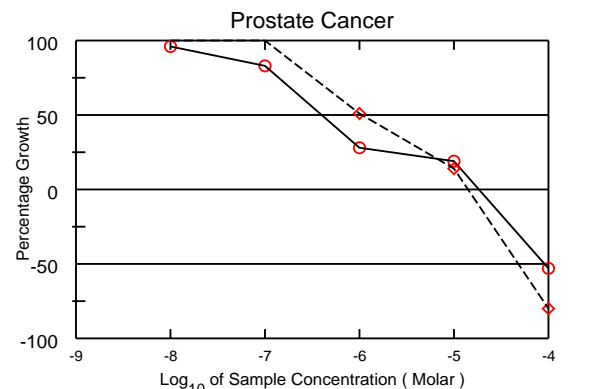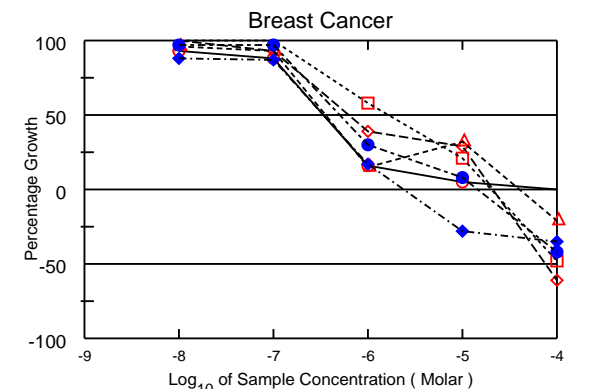

Mean Graphs

Report Date :July 13, 2015

Test Date :February 25, 2013

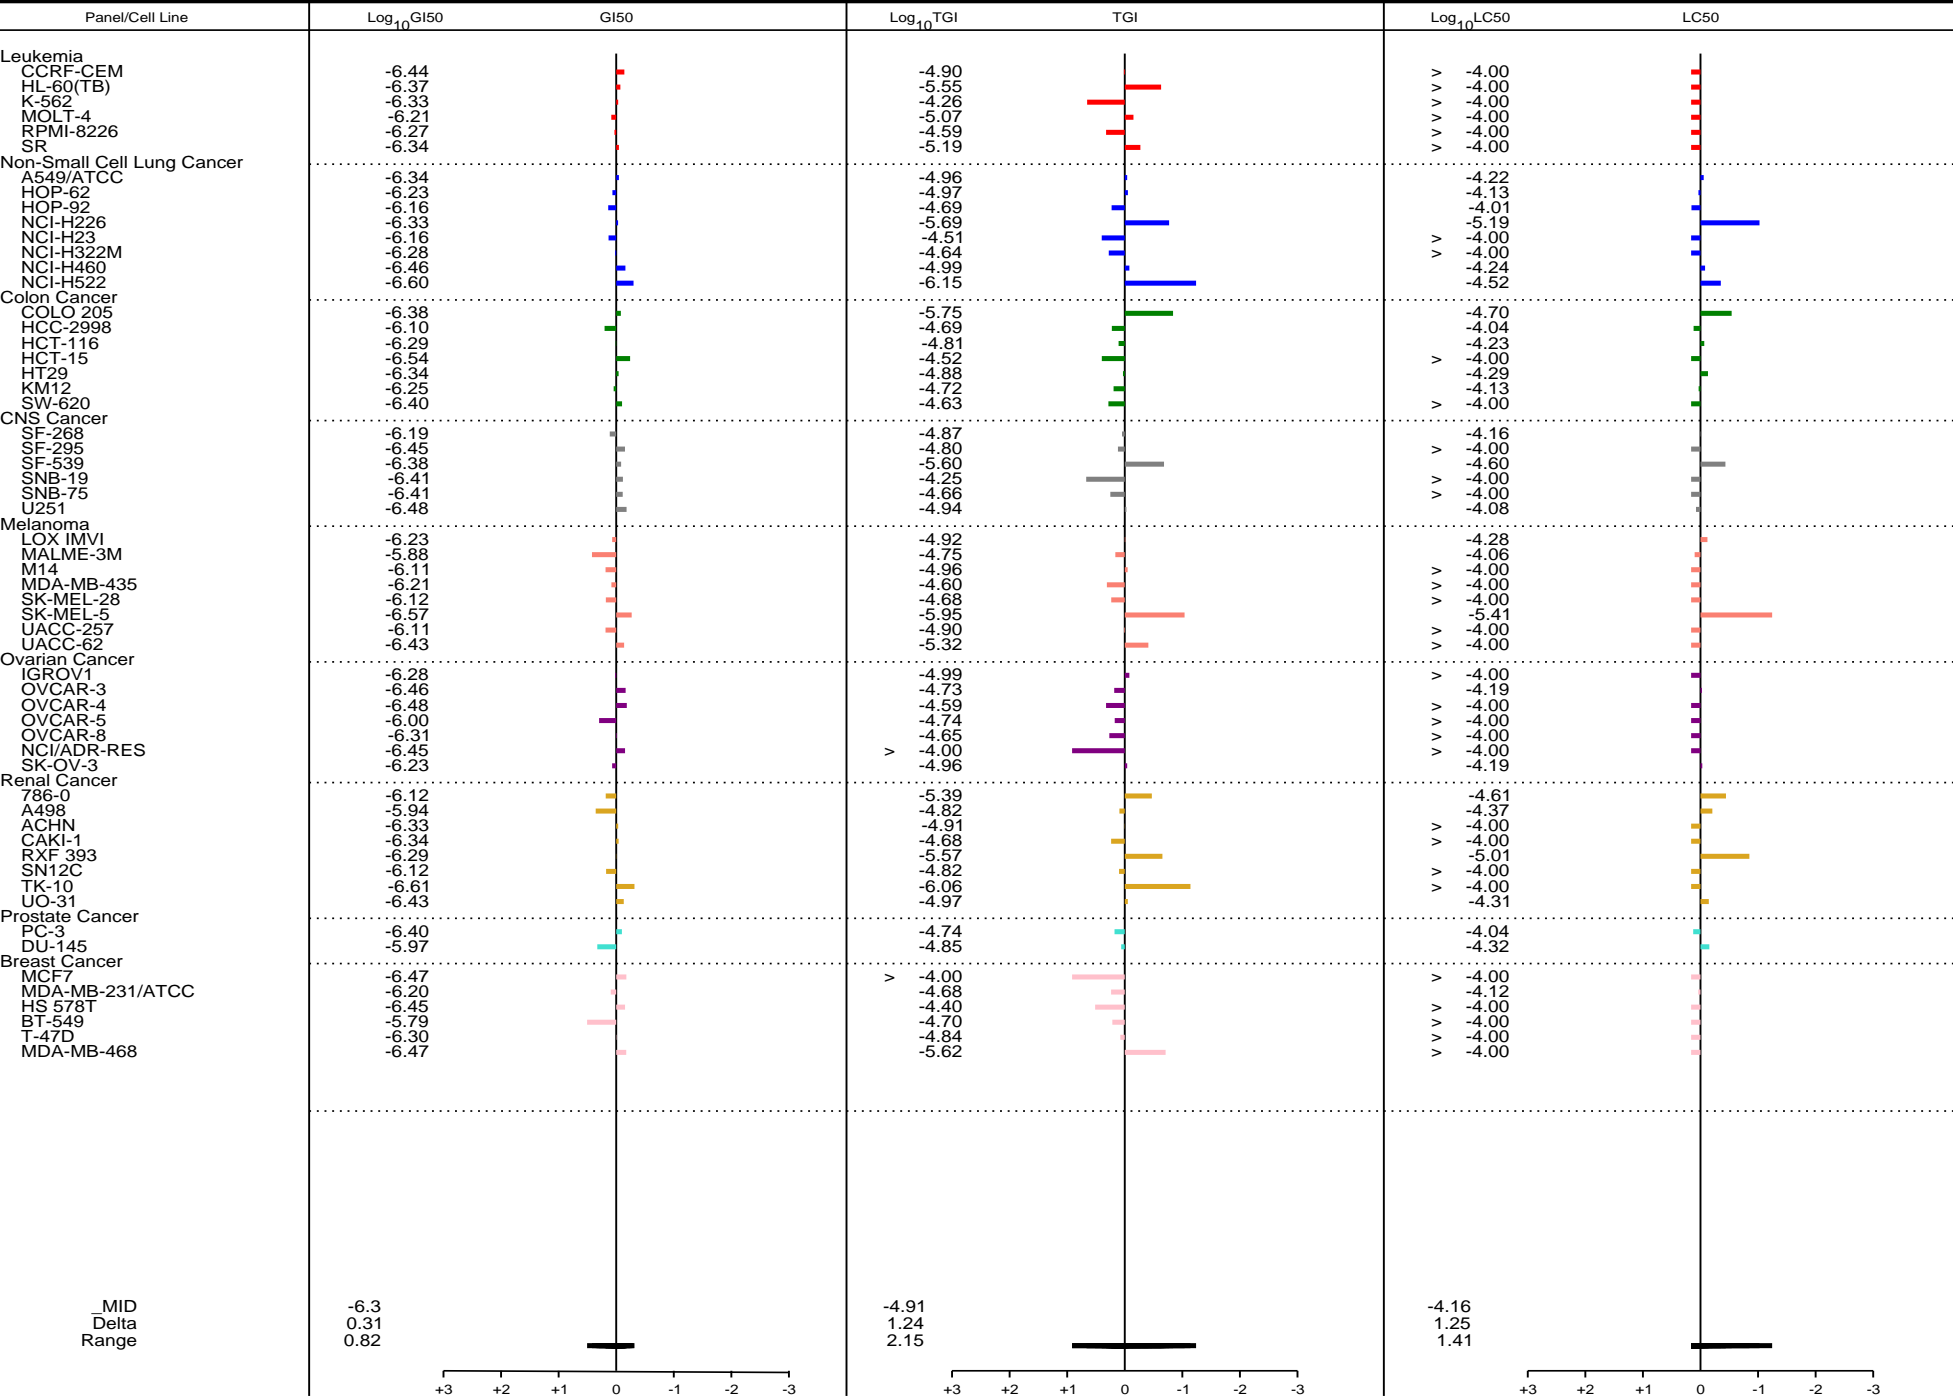

All Cell Lines

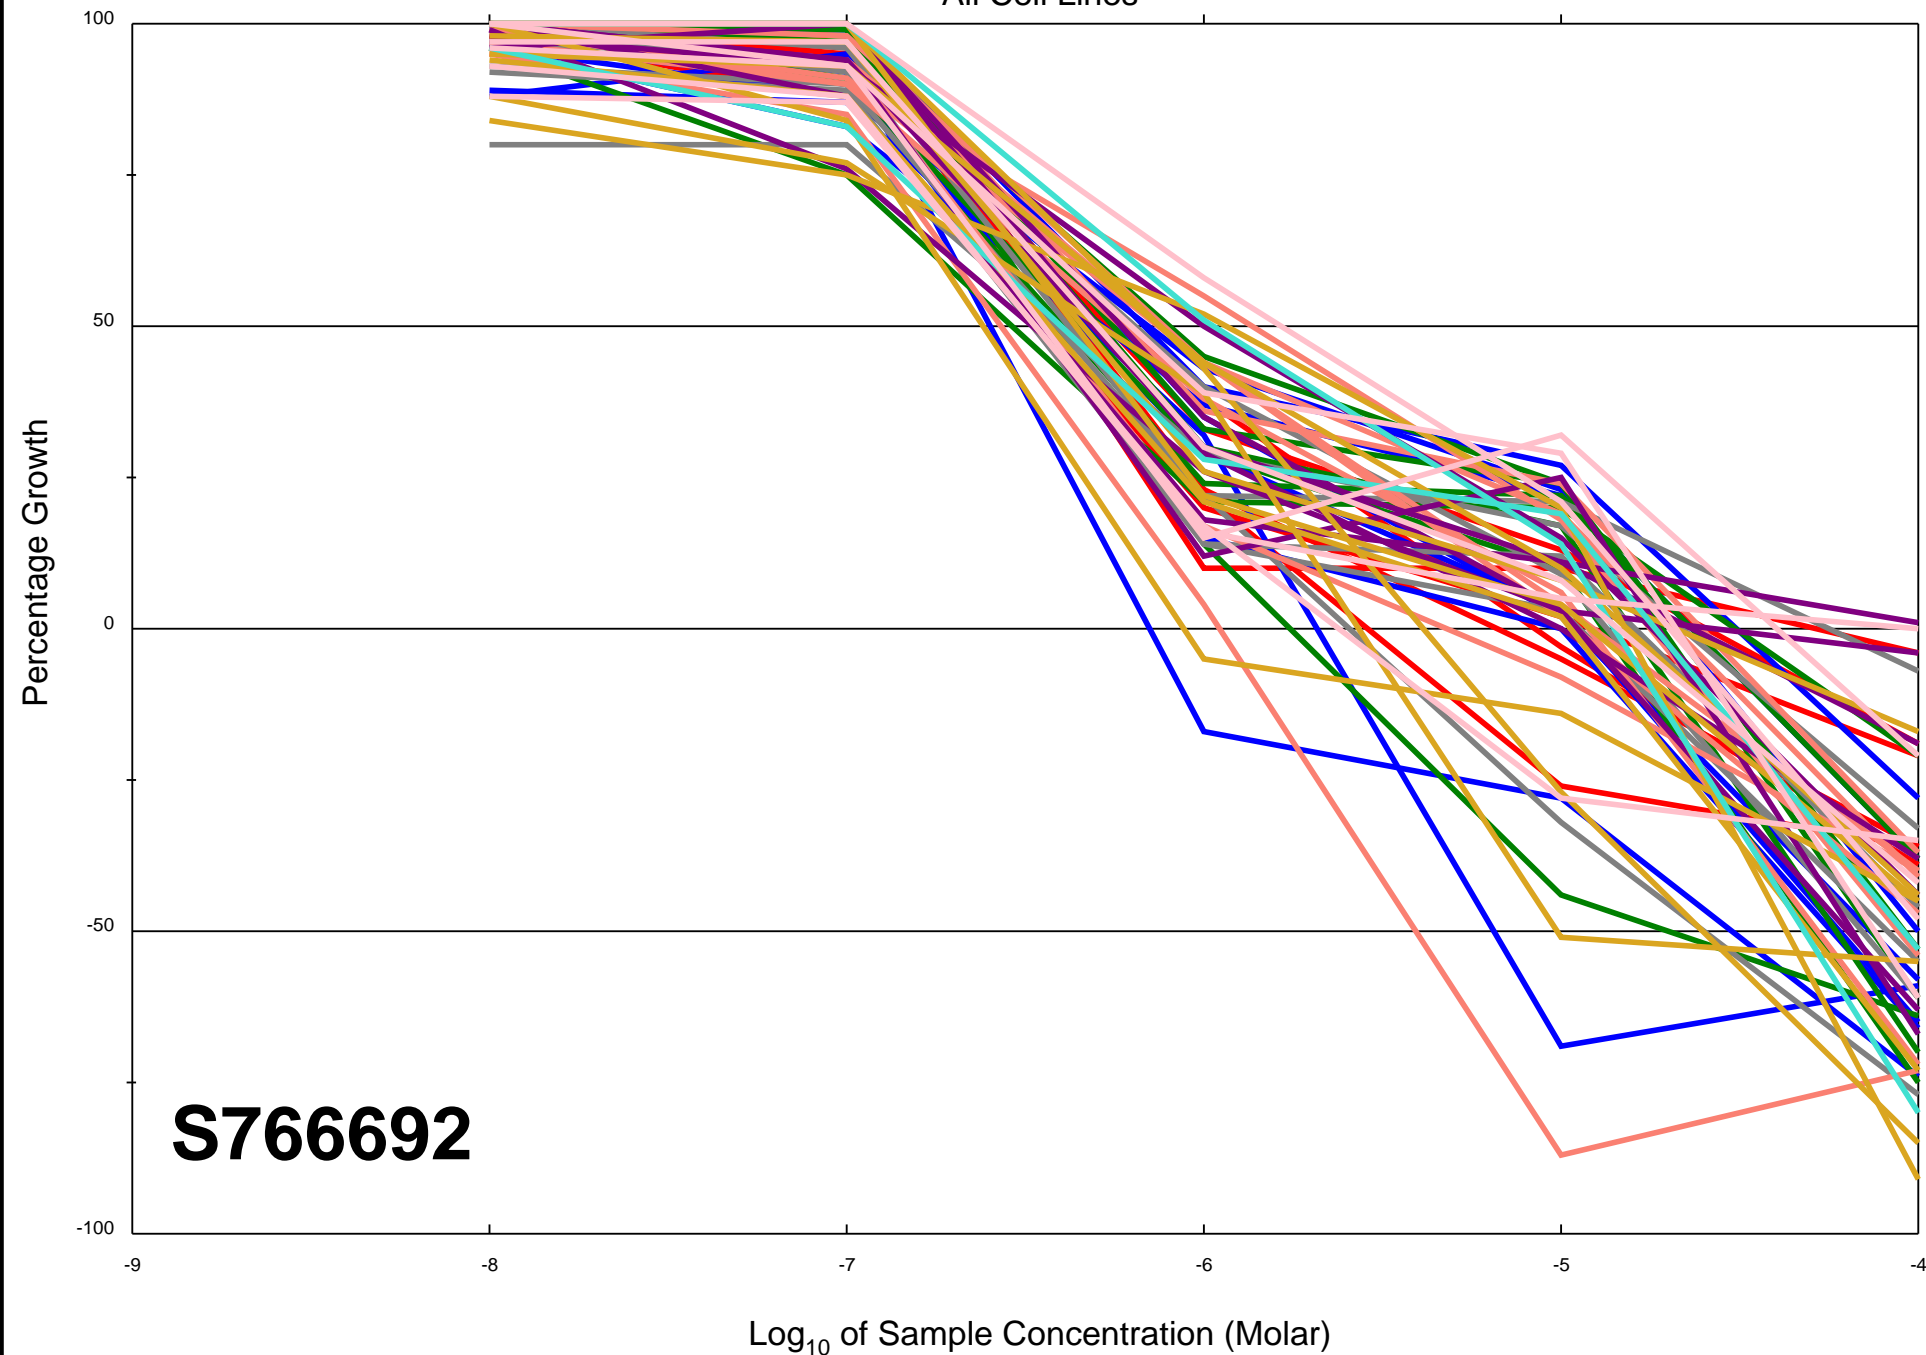

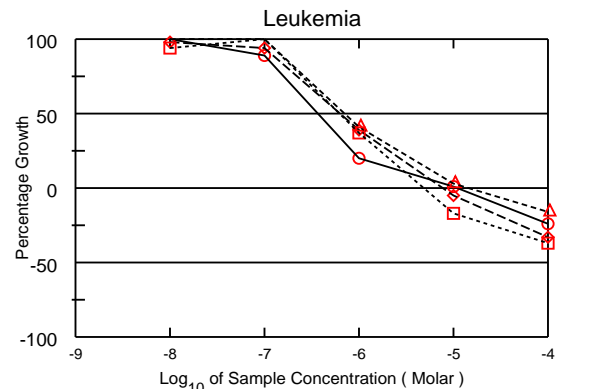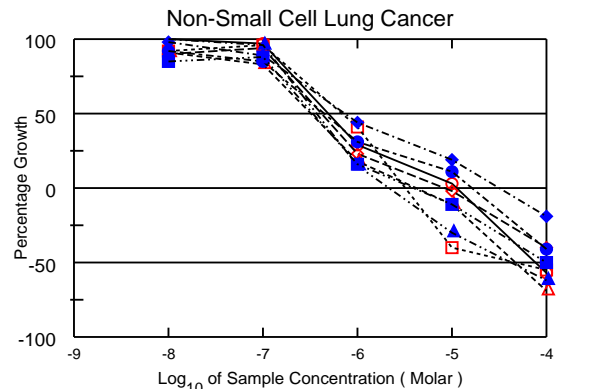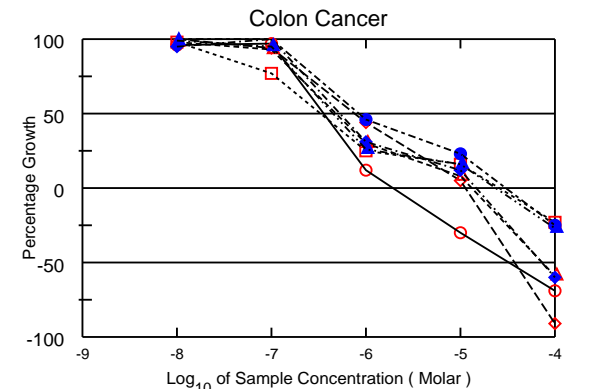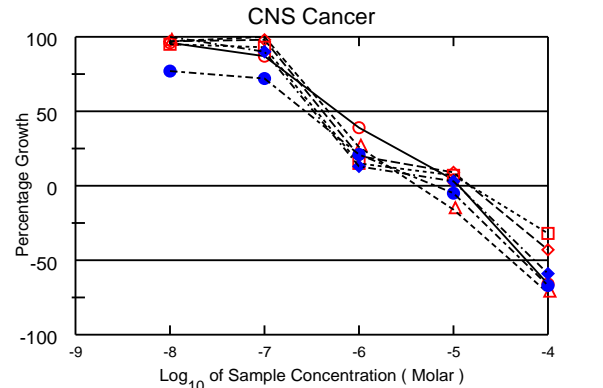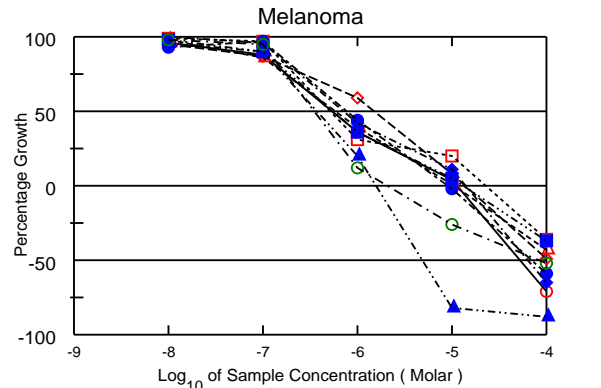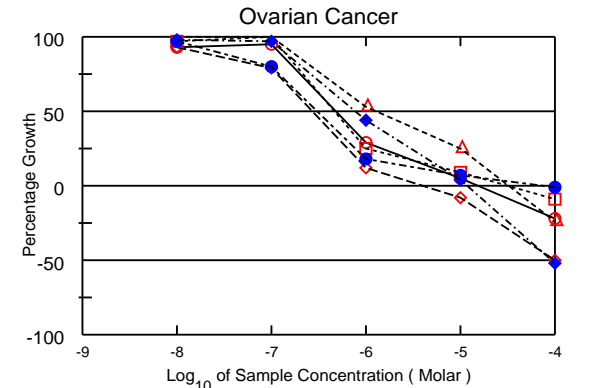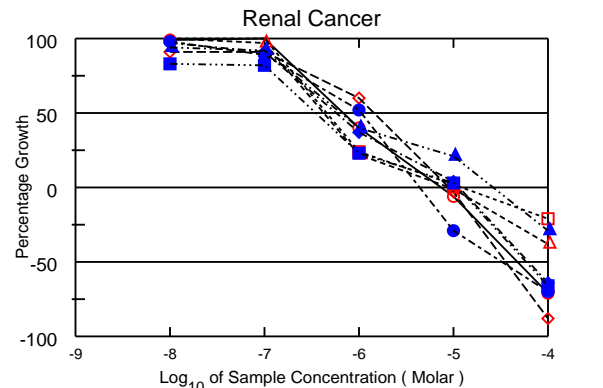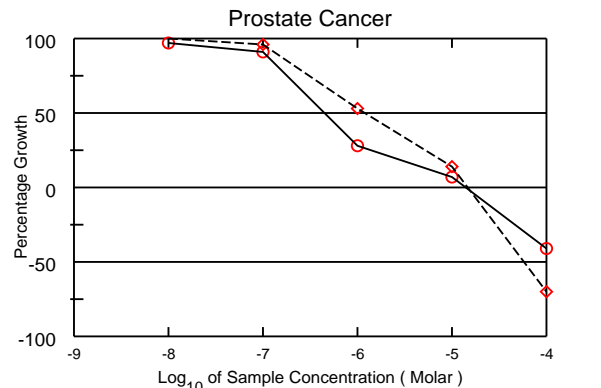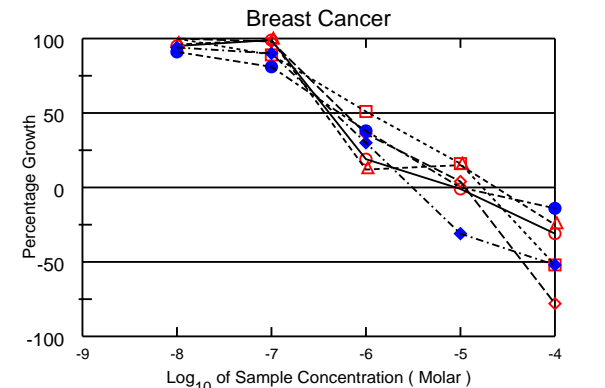

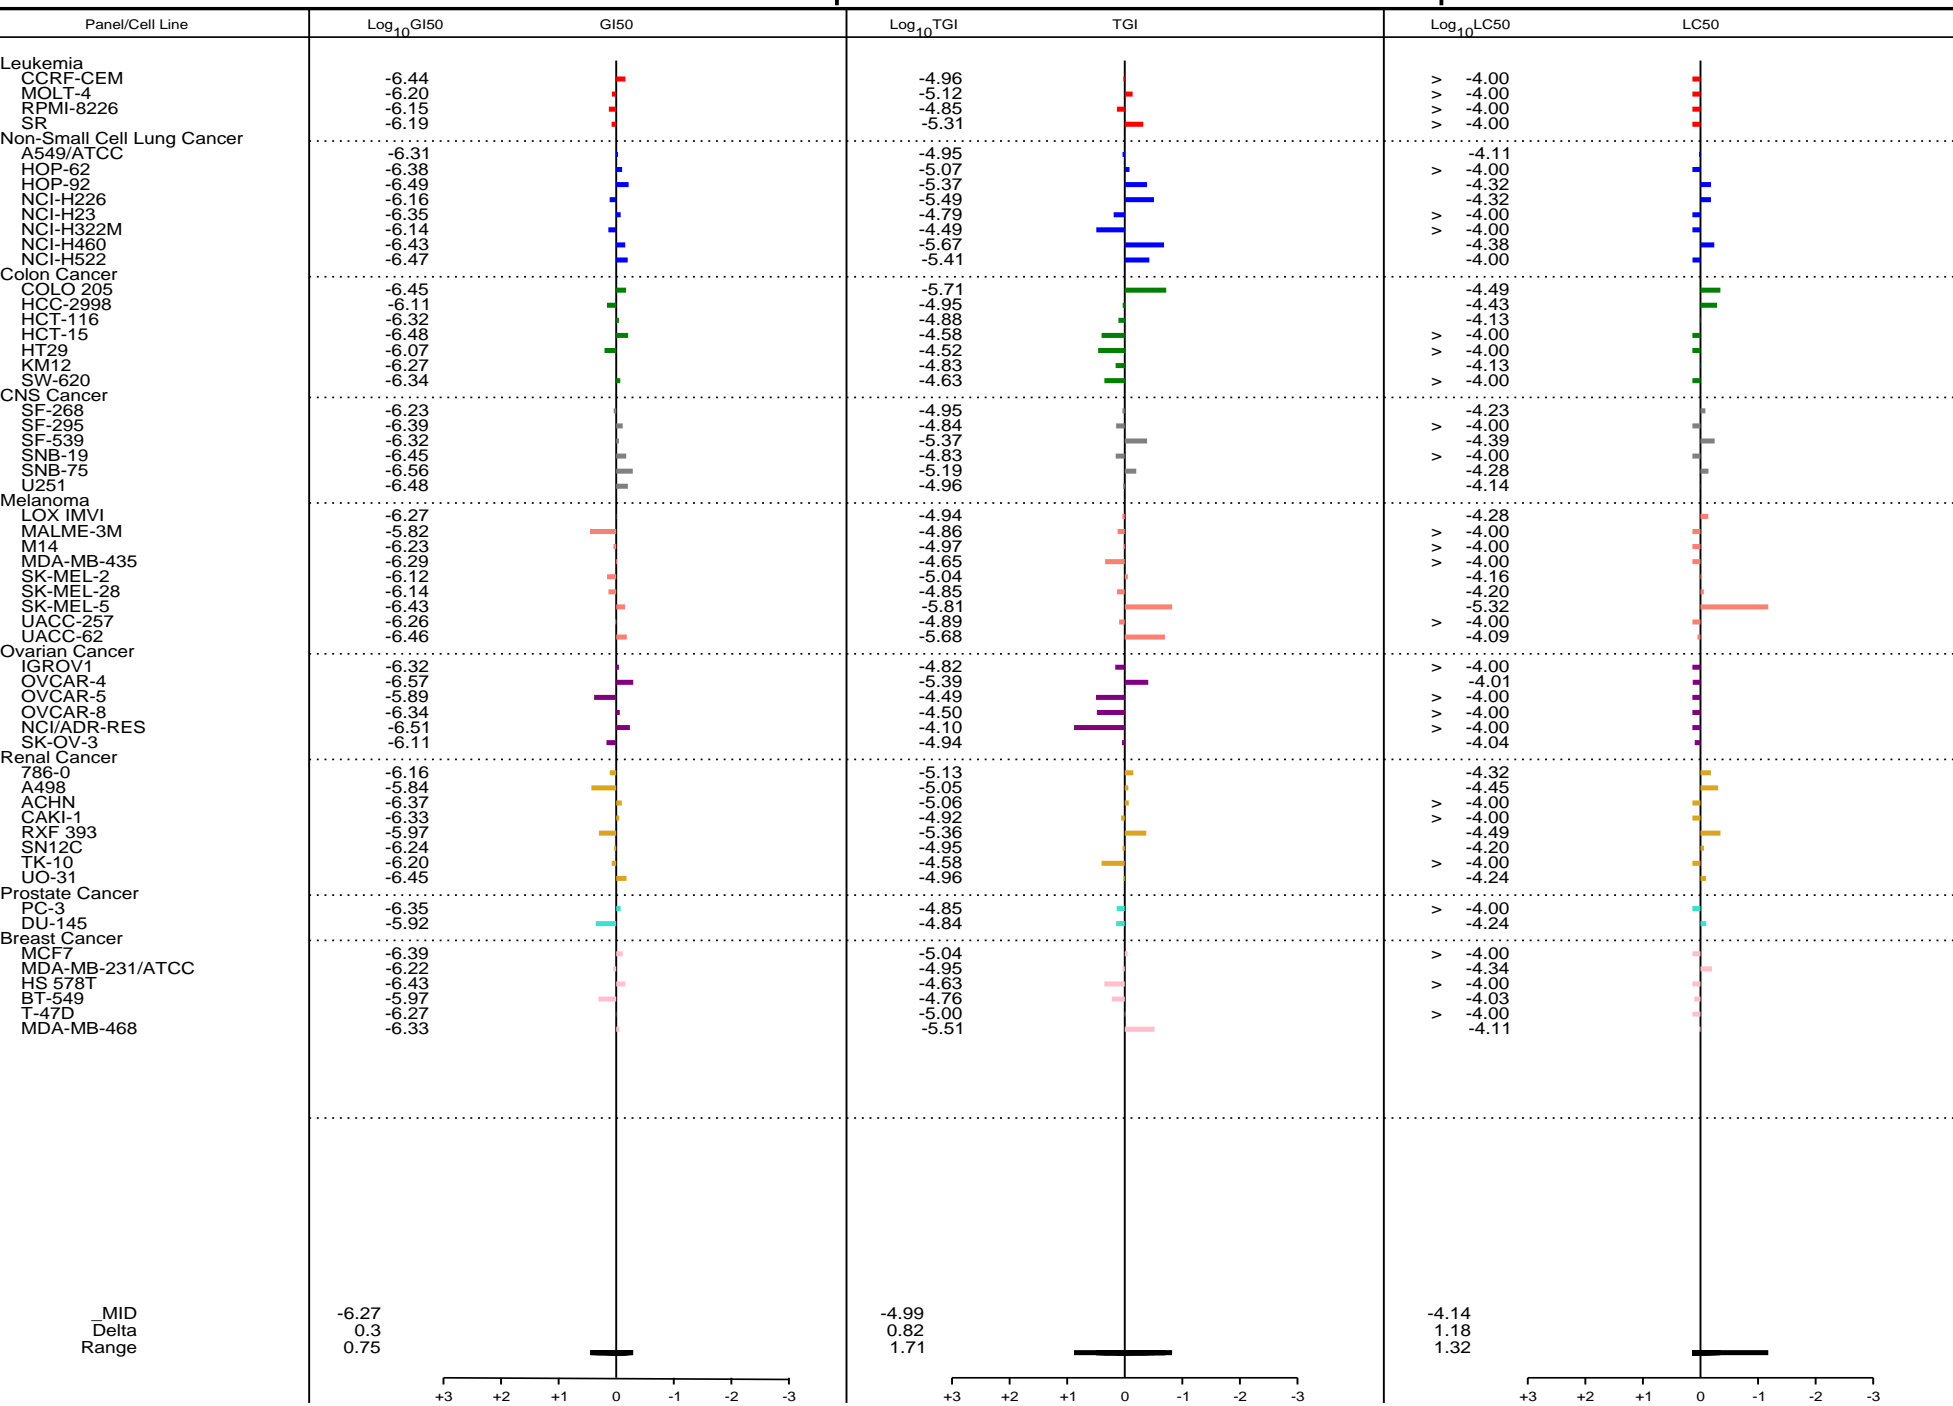

All Cell Lines

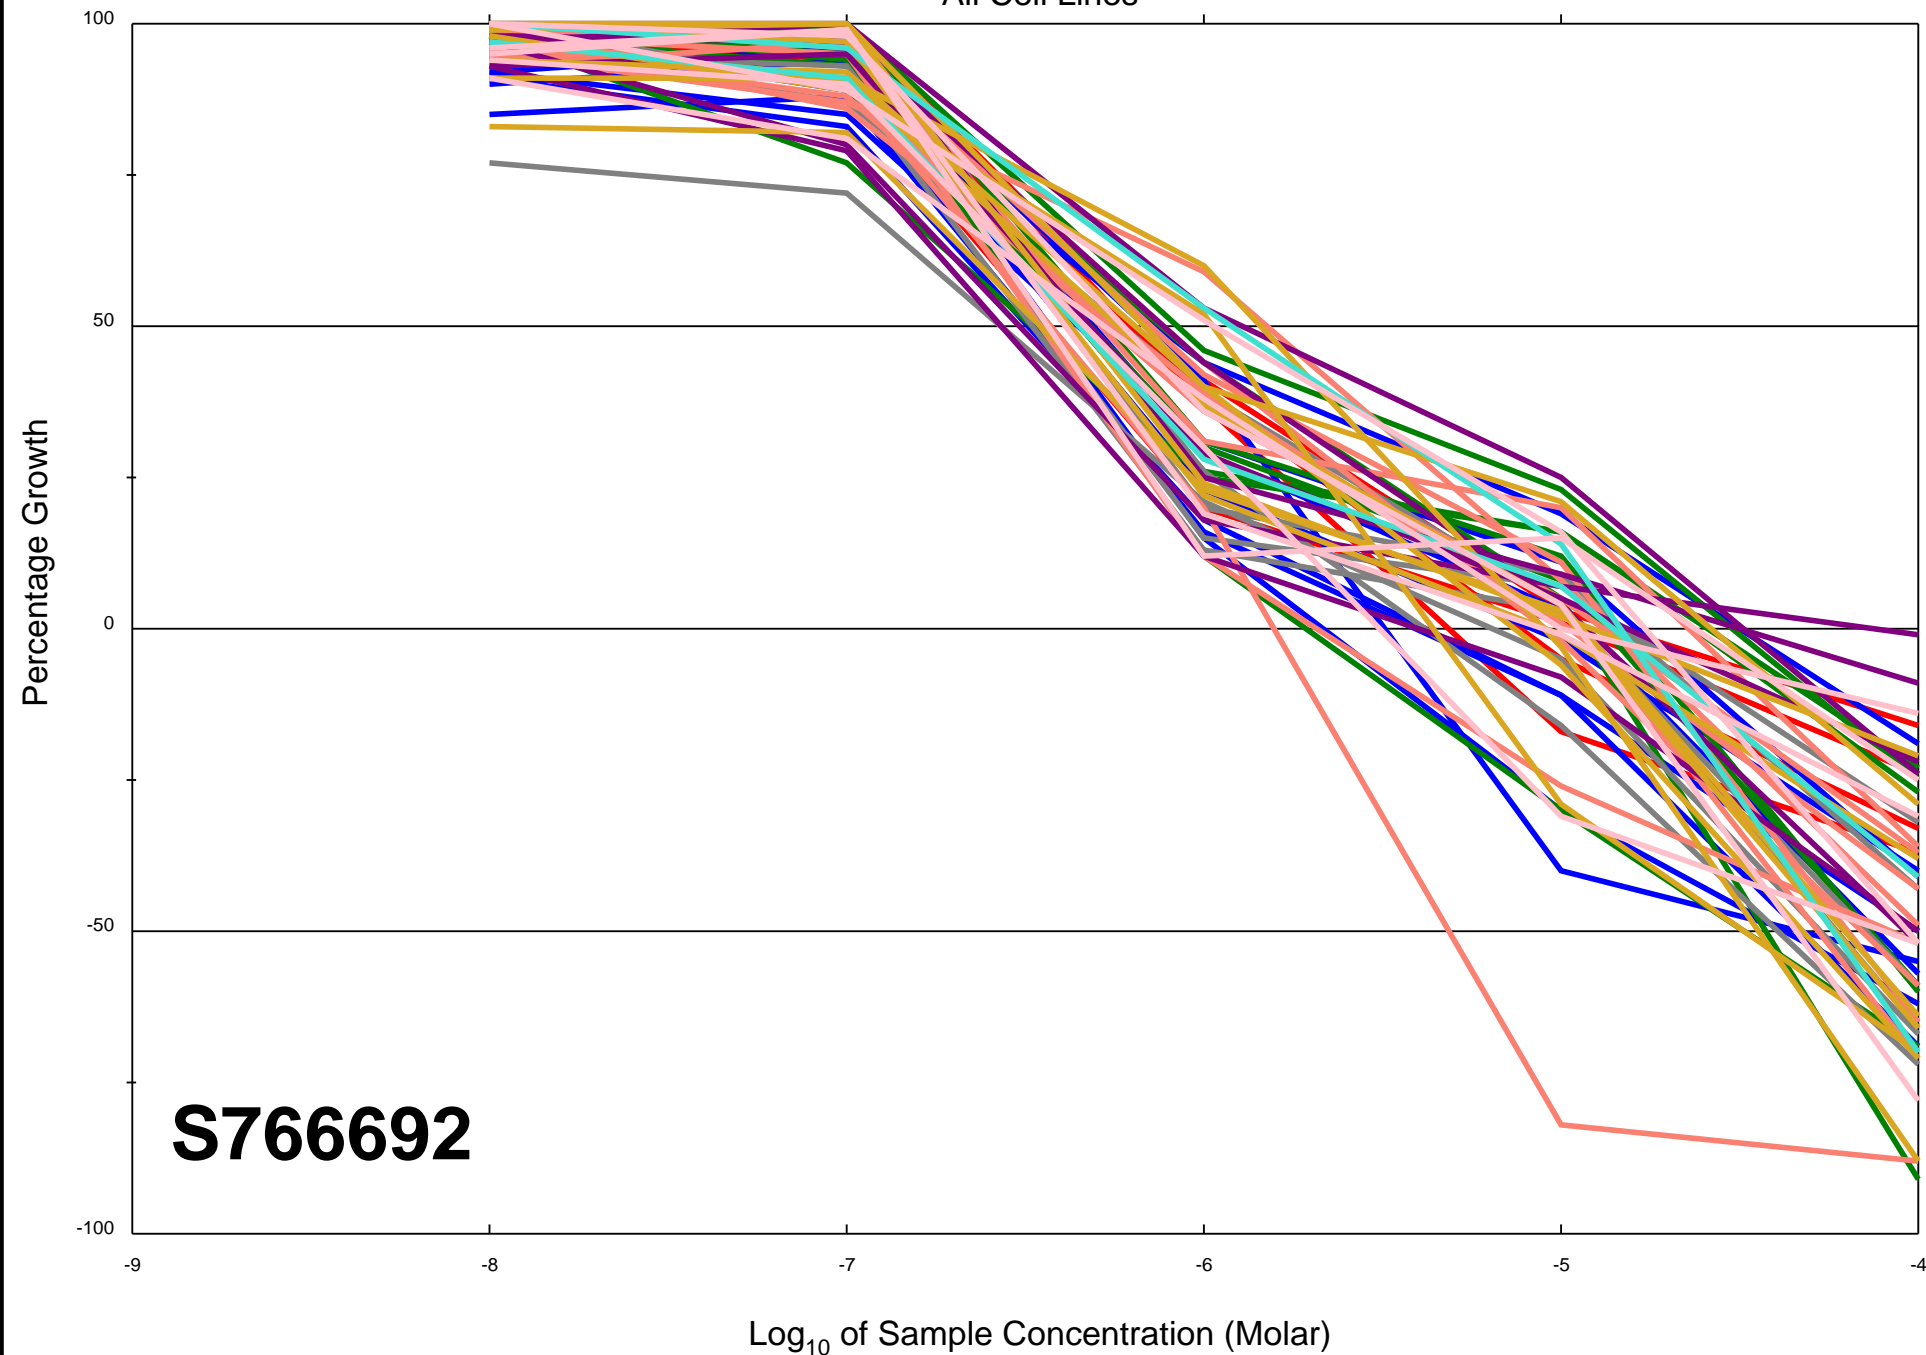

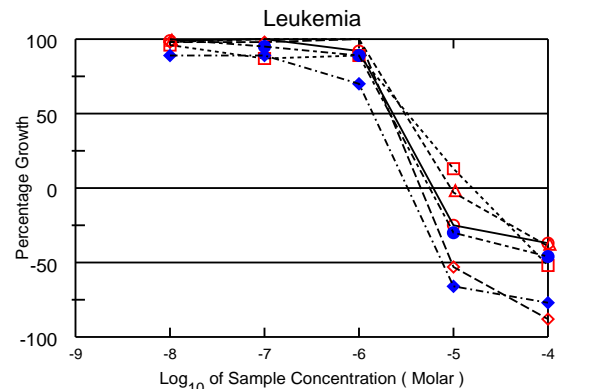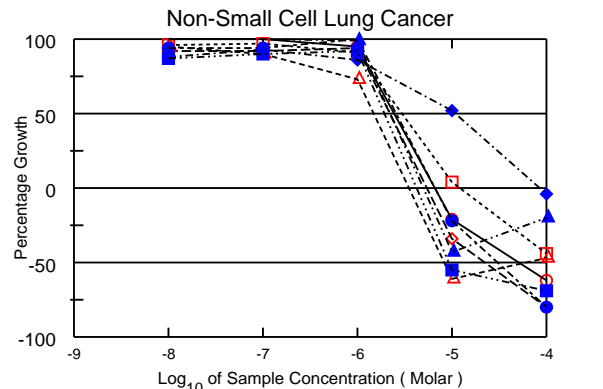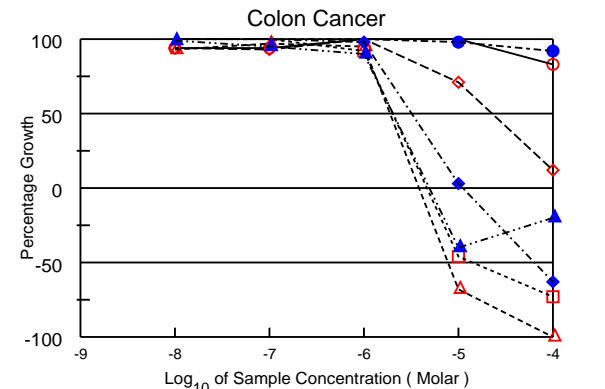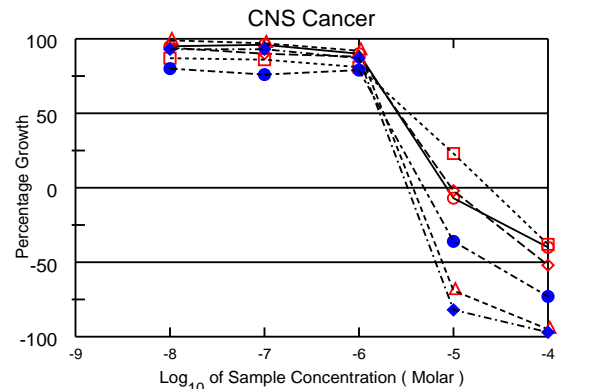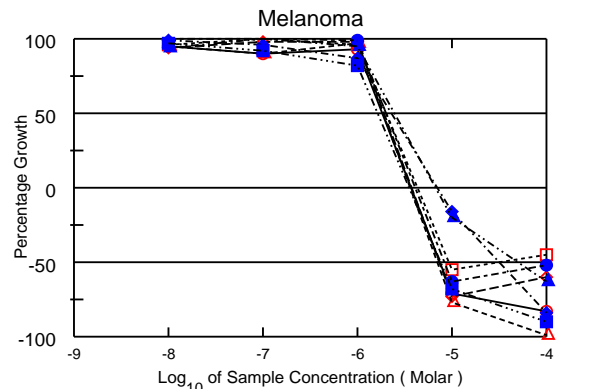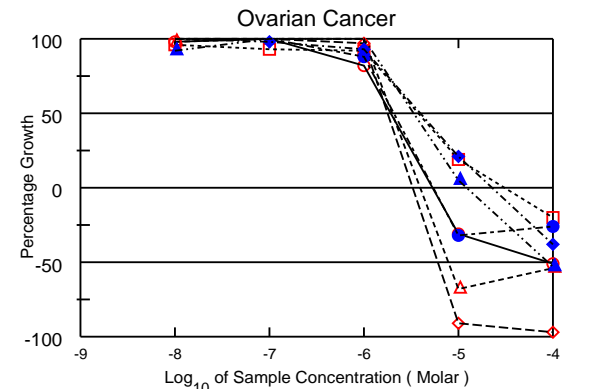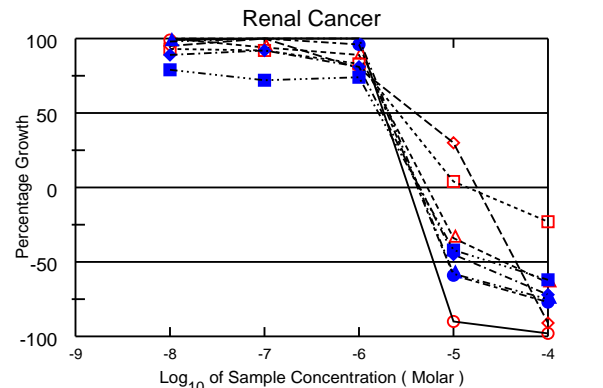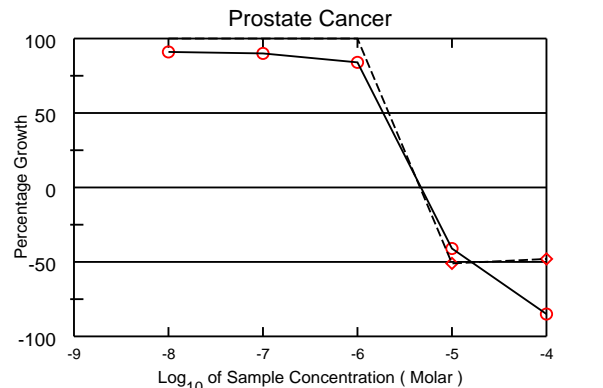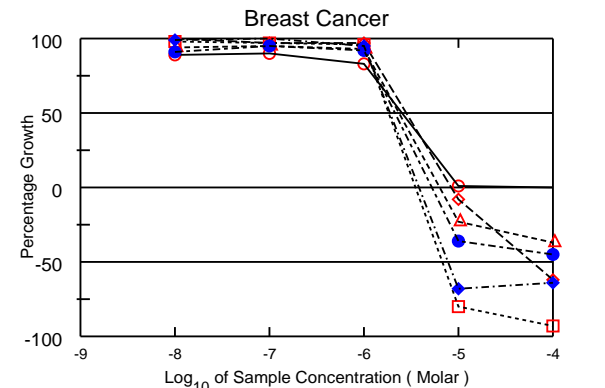

| National Cancer Institute Developmental Therapeutics Program |                        |      | NSC :766722/2              |     | Units :Molar           |      | SSPL :0YQS                   |  | EXP. ID :1302NS28 |  |
|--------------------------------------------------------------|------------------------|------|----------------------------|-----|------------------------|------|------------------------------|--|-------------------|--|
| Mean Graphs                                                  |                        |      | Report Date :July 13, 2015 |     |                        |      | Test Date :February 25, 2013 |  |                   |  |
| Panel/Cell Line                                              | Log <sub>10</sub> GI50 | GI50 | Log <sub>10</sub> TGI      | TGI | Log <sub>10</sub> LC50 | LC50 |                              |  |                   |  |
| Leukemia                                                     |                        |      |                            |     |                        |      |                              |  |                   |  |
| CCRF-CEM                                                     | -5.64                  |      | -5.22                      |     | > -4.00                |      |                              |  |                   |  |
| HL-60(TB)                                                    | -5.67                  |      | -5.34                      |     | -5.02                  |      |                              |  |                   |  |
| K-562                                                        | -5.51                  |      | -5.03                      |     | > -4.00                |      |                              |  |                   |  |
| MOLT-4                                                       | -5.49                  |      | -4.80                      |     | -4.04                  |      |                              |  |                   |  |
| RPMI-8226                                                    | -5.67                  |      | -5.25                      |     | > -4.00                |      |                              |  |                   |  |
| SR                                                           | -5.85                  |      | -5.49                      |     | -5.12                  |      |                              |  |                   |  |
| Non-Small Cell Lung Cancer                                   |                        |      |                            |     |                        |      |                              |  |                   |  |
| A549/ATCC                                                    | -5.61                  |      | -5.18                      |     | -4.29                  |      |                              |  |                   |  |
| HOP-62                                                       | -5.66                  |      | -5.26                      |     | -4.65                  |      |                              |  |                   |  |
| HOP-92                                                       | -5.83                  |      | -5.45                      |     |                        |      |                              |  |                   |  |
| NCI-H226                                                     | -5.53                  |      | -4.92                      |     | > -4.00                |      |                              |  |                   |  |
| NCI-H23                                                      | -5.59                  |      | -5.18                      |     | -4.51                  |      |                              |  |                   |  |
| NCI-H322M                                                    | -4.96                  |      | -4.07                      |     | > -4.00                |      |                              |  |                   |  |
| NCI-H460                                                     | -5.66                  |      | -5.31                      |     | > -4.00                |      |                              |  |                   |  |
| NCI-H522                                                     | -5.71                  |      | -5.37                      |     | -5.03                  |      |                              |  |                   |  |
| Colon Cancer                                                 |                        |      |                            |     |                        |      |                              |  |                   |  |
| COLO 205                                                     | > -4.00                |      | > -4.00                    |     | > -4.00                |      |                              |  |                   |  |
| HCC-2998                                                     | -4.64                  |      | > -4.00                    |     | > -4.00                |      |                              |  |                   |  |
| HCT-116                                                      | -5.72                  |      | -5.42                      |     | -5.11                  |      |                              |  |                   |  |
| HCT-15                                                       | -5.70                  |      | -5.33                      |     | -4.86                  |      |                              |  |                   |  |
| HT29                                                         | > -4.00                |      | > -4.00                    |     | > -4.00                |      |                              |  |                   |  |
| KM12                                                         | -5.49                  |      | -4.96                      |     | -4.20                  |      |                              |  |                   |  |
| SW-620                                                       | -5.69                  |      | -5.31                      |     | > -4.00                |      |                              |  |                   |  |
| CNS Cancer                                                   |                        |      |                            |     |                        |      |                              |  |                   |  |
| SF-268                                                       | -5.59                  |      | -5.07                      |     | > -4.00                |      |                              |  |                   |  |
| SF-295                                                       | -5.58                  |      | -5.02                      |     | -4.05                  |      |                              |  |                   |  |
| SF-539                                                       | -5.74                  |      | -5.43                      |     | -5.12                  |      |                              |  |                   |  |
| SNB-19                                                       | -5.46                  |      | -4.62                      |     | > -4.00                |      |                              |  |                   |  |
| SNB-75                                                       | -5.75                  |      | -5.31                      |     | -4.62                  |      |                              |  |                   |  |
| U251                                                         | -5.78                  |      | -5.49                      |     | -5.19                  |      |                              |  |                   |  |
| Melanoma                                                     |                        |      |                            |     |                        |      |                              |  |                   |  |
| LOX IMVI                                                     | -5.74                  |      | -5.43                      |     | -5.13                  |      |                              |  |                   |  |
| MALME-3M                                                     | -5.72                  |      | -5.43                      |     | -5.13                  |      |                              |  |                   |  |
| M14                                                          | -5.73                  |      | -5.44                      |     | -5.16                  |      |                              |  |                   |  |
| MDA-MB-435                                                   | -5.70                  |      | -5.37                      |     |                        |      |                              |  |                   |  |
| SK-MEL-28                                                    | -5.70                  |      | -5.39                      |     | -5.08                  |      |                              |  |                   |  |
| SK-MEL-5                                                     | -5.64                  |      | -5.15                      |     | -4.50                  |      |                              |  |                   |  |
| UACC-257                                                     | -5.61                  |      | -5.18                      |     | -4.31                  |      |                              |  |                   |  |
| UACC-62                                                      | -5.79                  |      | -5.45                      |     | -5.12                  |      |                              |  |                   |  |
| Ovarian Cancer                                               |                        |      |                            |     |                        |      |                              |  |                   |  |
| IGROV1                                                       | -5.72                  |      | -5.28                      |     | -4.03                  |      |                              |  |                   |  |
| OVCAR-3                                                      | -5.75                  |      | -5.48                      |     | -5.22                  |      |                              |  |                   |  |
| OVCAR-4                                                      | -5.69                  |      | -5.40                      |     | -5.10                  |      |                              |  |                   |  |
| OVCAR-5                                                      | -5.43                  |      | -4.51                      |     | > -4.00                |      |                              |  |                   |  |
| OVCAR-8                                                      | -5.68                  |      | -5.27                      |     | > -4.00                |      |                              |  |                   |  |
| NCI/ADR-RES                                                  | -5.40                  |      | -4.64                      |     | > -4.00                |      |                              |  |                   |  |
| SK-OV-3                                                      | -5.47                  |      | -4.91                      |     | -4.05                  |      |                              |  |                   |  |
| Renal Cancer                                                 |                        |      |                            |     |                        |      |                              |  |                   |  |
| 786-0                                                        | -5.74                  |      | -5.47                      |     | -5.21                  |      |                              |  |                   |  |
| A498                                                         | -5.40                  |      | -4.75                      |     | -4.34                  |      |                              |  |                   |  |
| ACHN                                                         | -5.68                  |      | -5.28                      |     | -4.47                  |      |                              |  |                   |  |
| CAKI-1                                                       | -5.58                  |      | -4.86                      |     | > -4.00                |      |                              |  |                   |  |
| RXF 393                                                      | -5.70                  |      | -5.38                      |     | -5.06                  |      |                              |  |                   |  |
| SN12C                                                        | -5.75                  |      | -5.35                      |     | -4.81                  |      |                              |  |                   |  |
| TK-10                                                        | -5.63                  |      | -5.34                      |     | -5.05                  |      |                              |  |                   |  |
| UO-31                                                        | -5.79                  |      | -5.36                      |     | -4.61                  |      |                              |  |                   |  |
| Prostate Cancer                                              |                        |      |                            |     |                        |      |                              |  |                   |  |
| PC-3                                                         | -5.73                  |      | -5.33                      |     | -4.79                  |      |                              |  |                   |  |
| DU-145                                                       | -5.66                  |      | -5.33                      |     |                        |      |                              |  |                   |  |
| Breast Cancer                                                |                        |      |                            |     |                        |      |                              |  |                   |  |
| MCF7                                                         | -5.60                  |      | > -4.00                    |     | > -4.00                |      |                              |  |                   |  |
| MDA-MB-231/ATCC                                              | -5.55                  |      | -5.08                      |     | -4.23                  |      |                              |  |                   |  |
| HS 578T                                                      | -5.63                  |      | -5.20                      |     | > -4.00                |      |                              |  |                   |  |
| BT-549                                                       | -5.74                  |      | -5.46                      |     | -5.17                  |      |                              |  |                   |  |
| T-47D                                                        | -5.67                  |      | -5.28                      |     | > -4.00                |      |                              |  |                   |  |
| MDA-MB-468                                                   | -5.72                  |      | -5.41                      |     | -5.11                  |      |                              |  |                   |  |

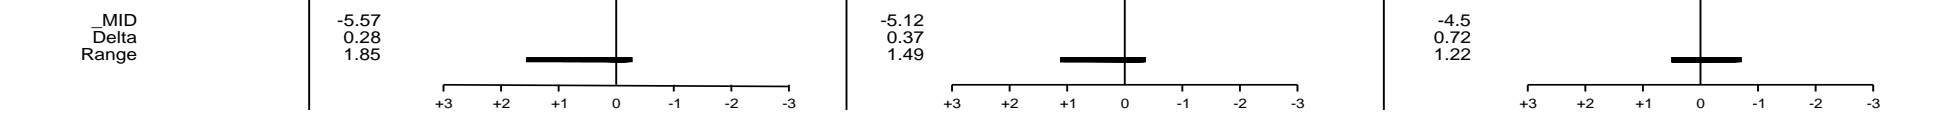

All Cell Lines

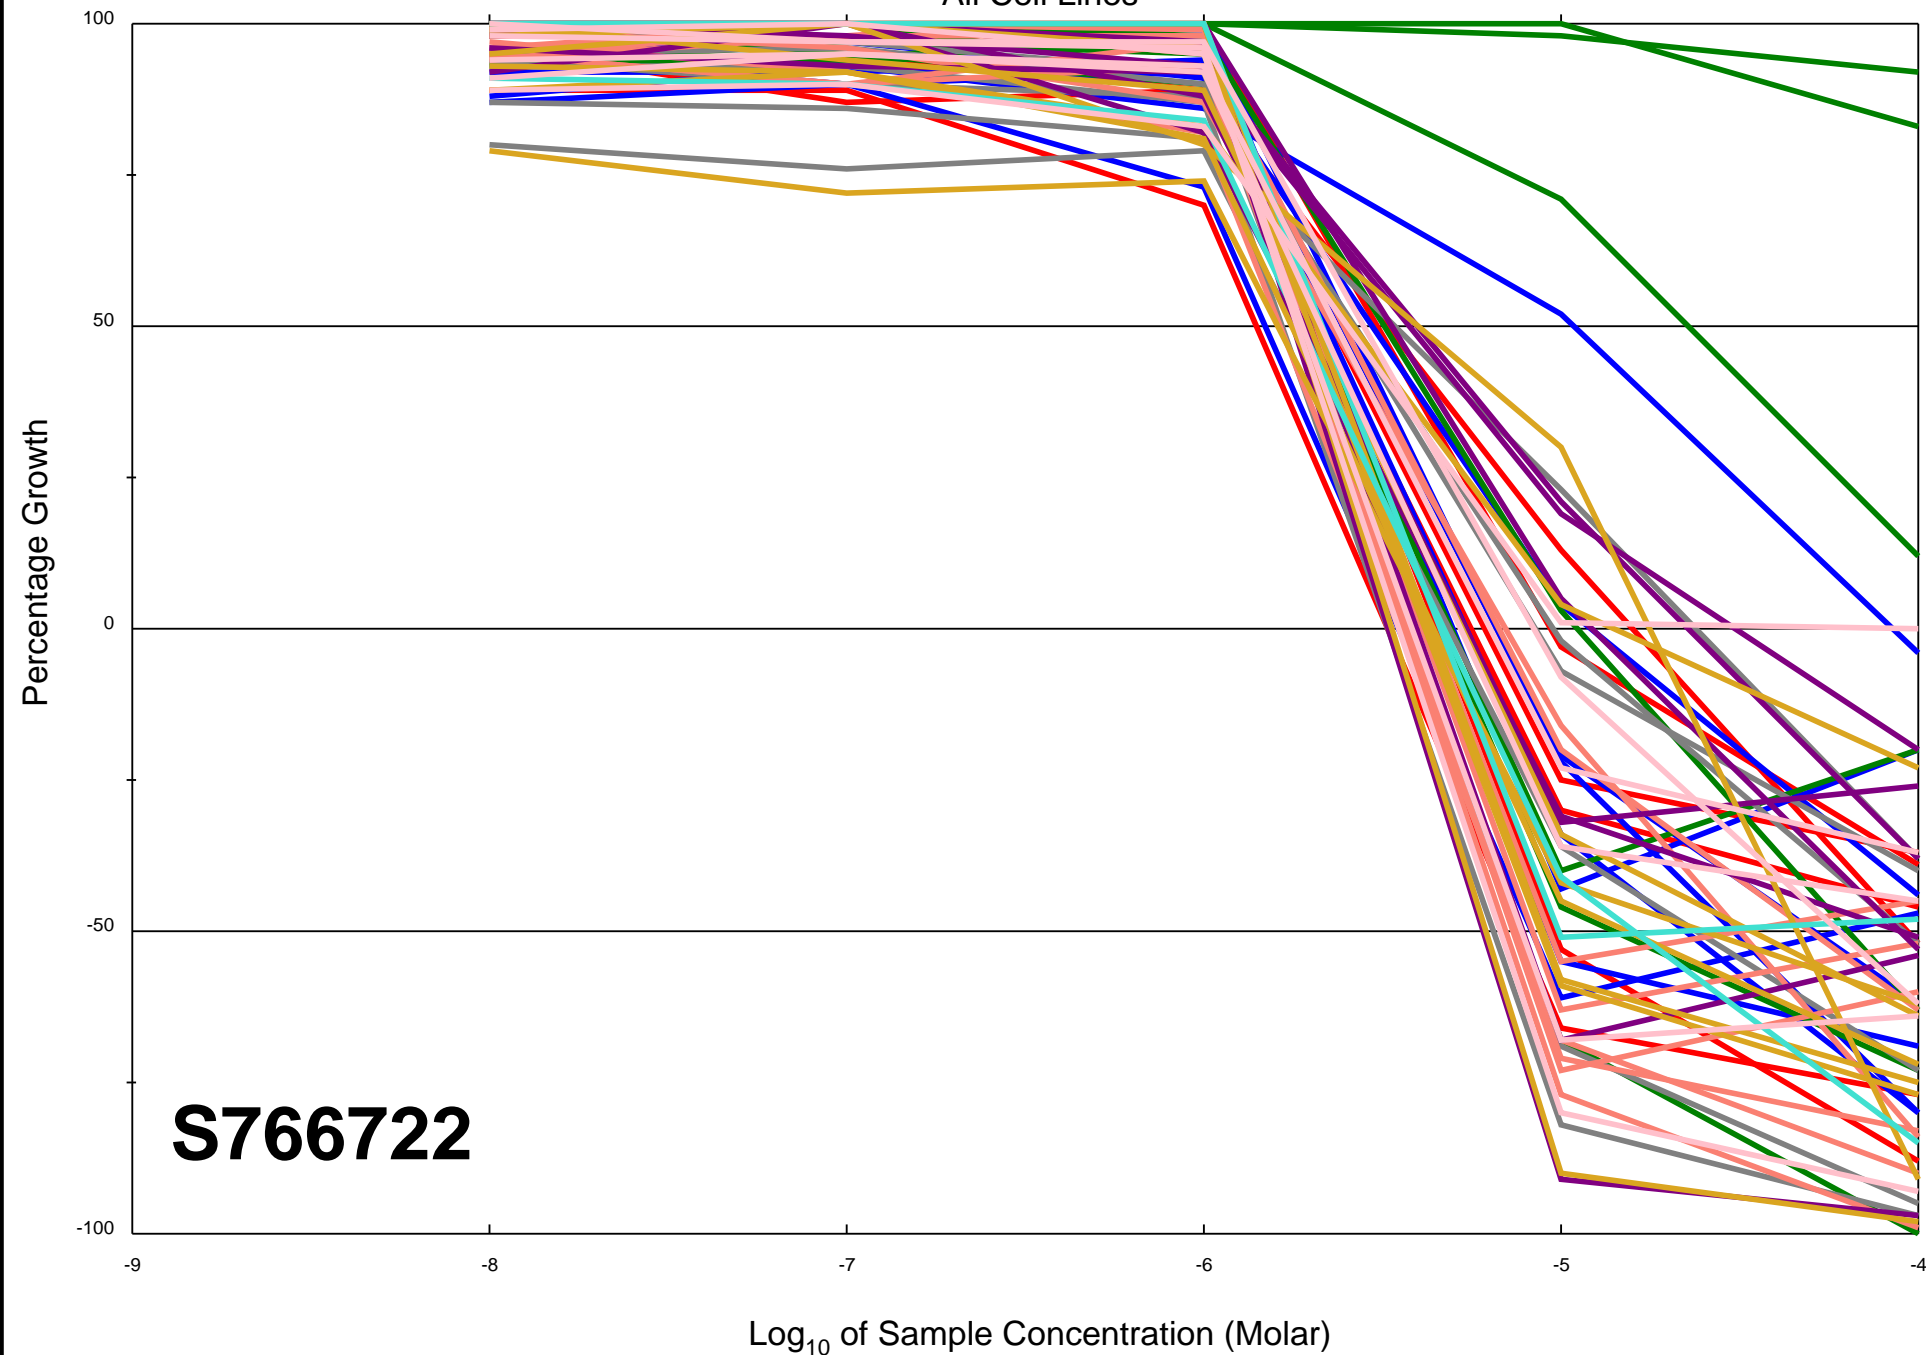

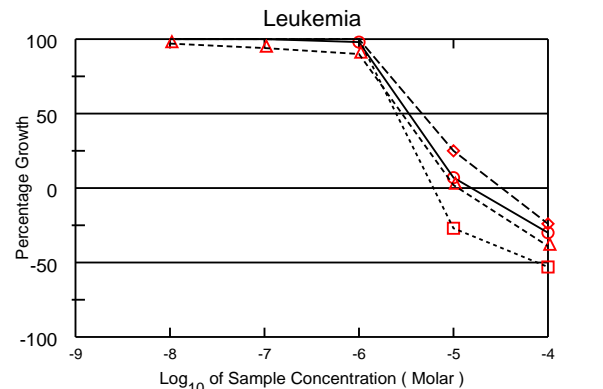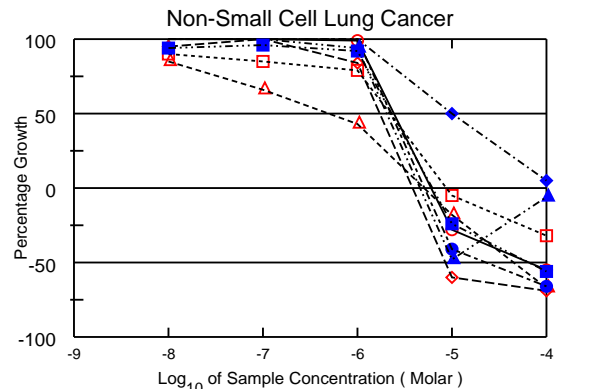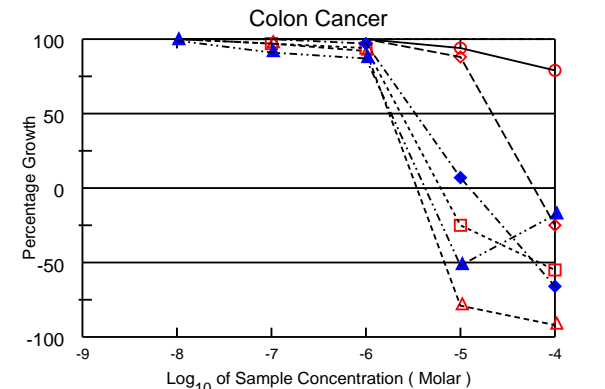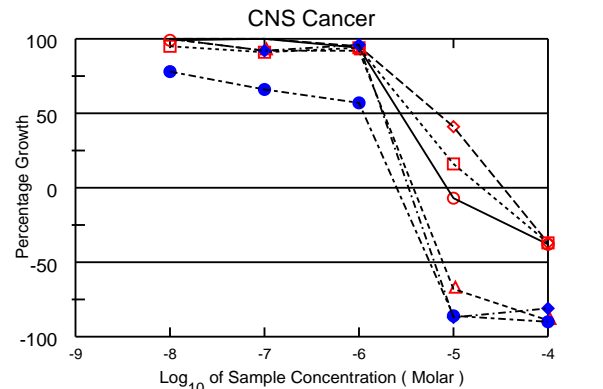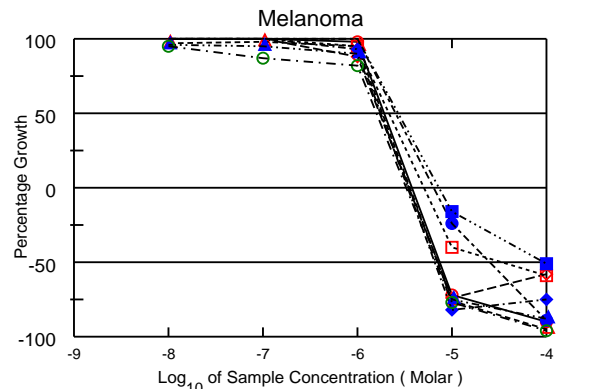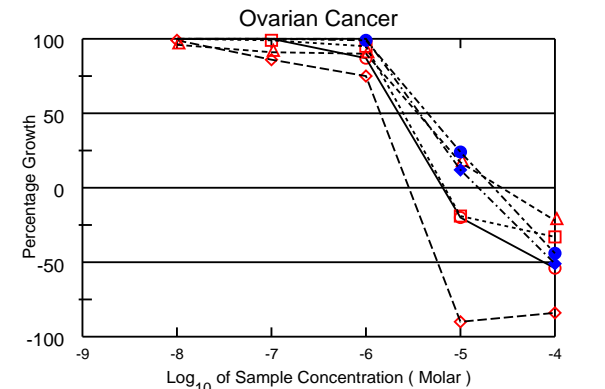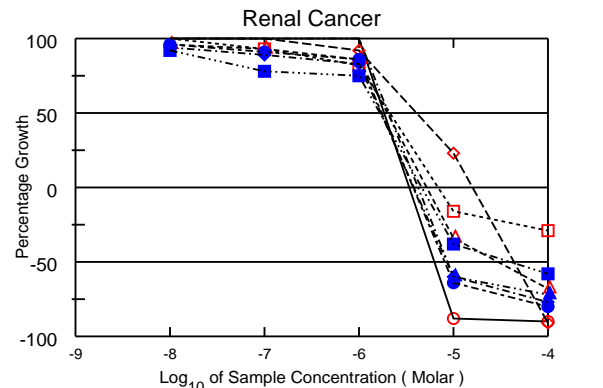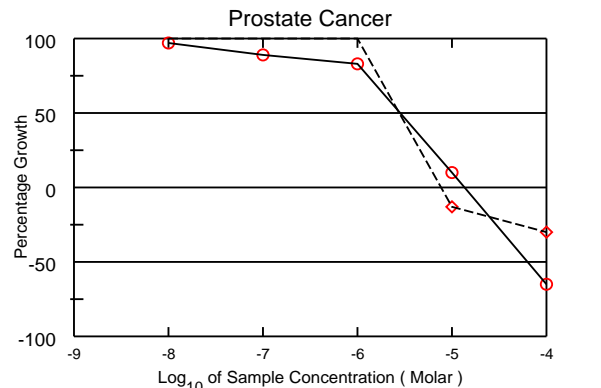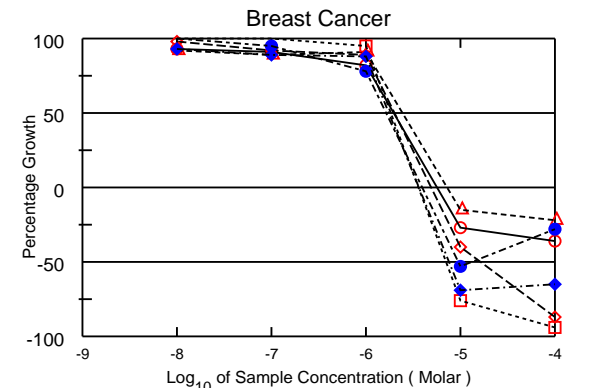

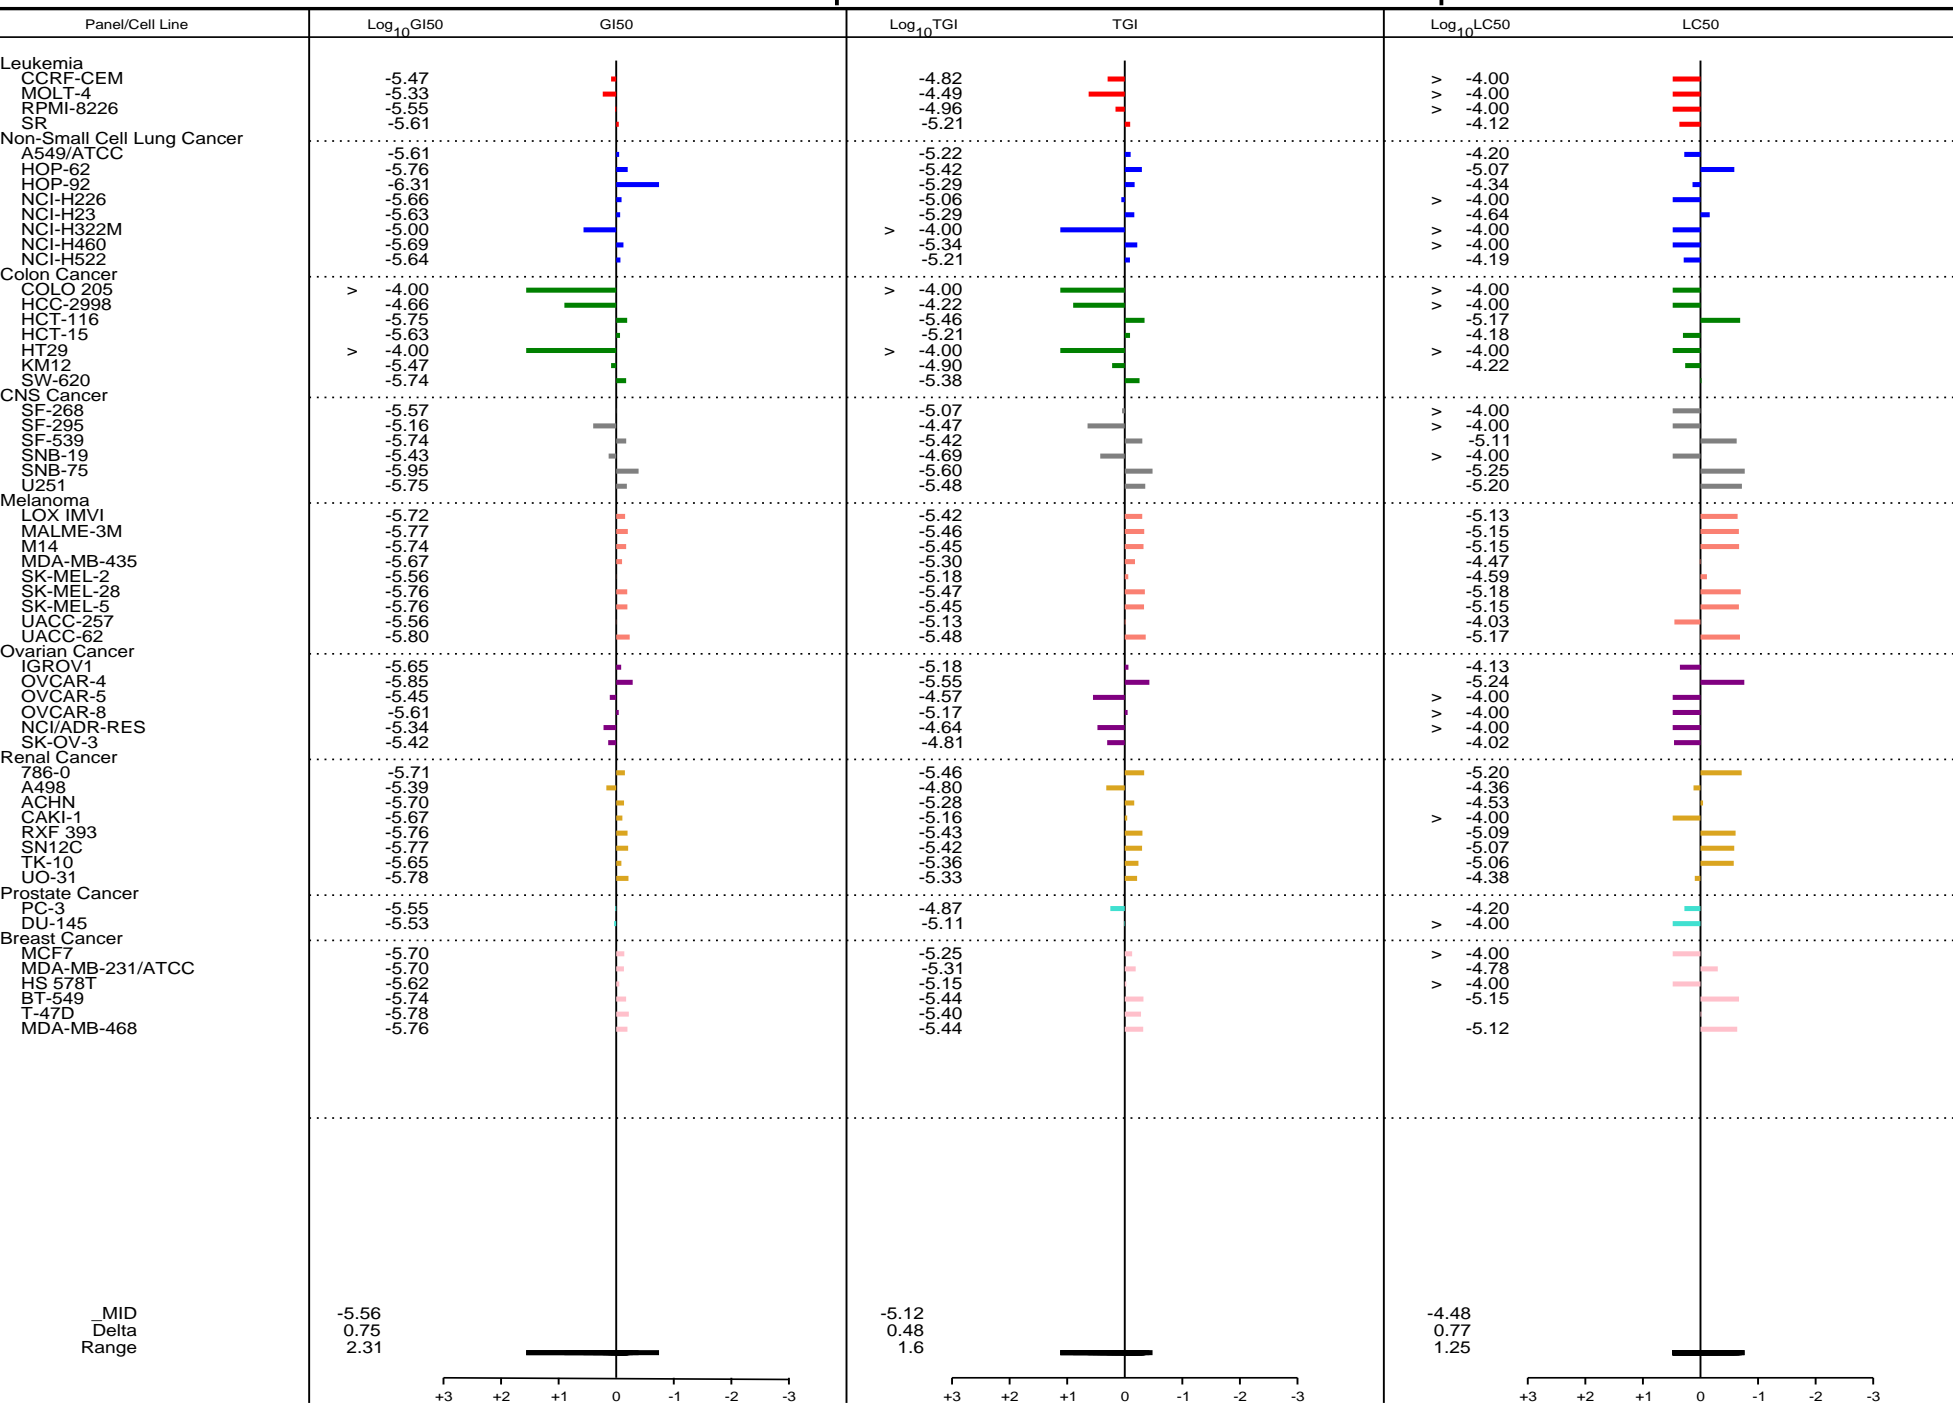

All Cell Lines

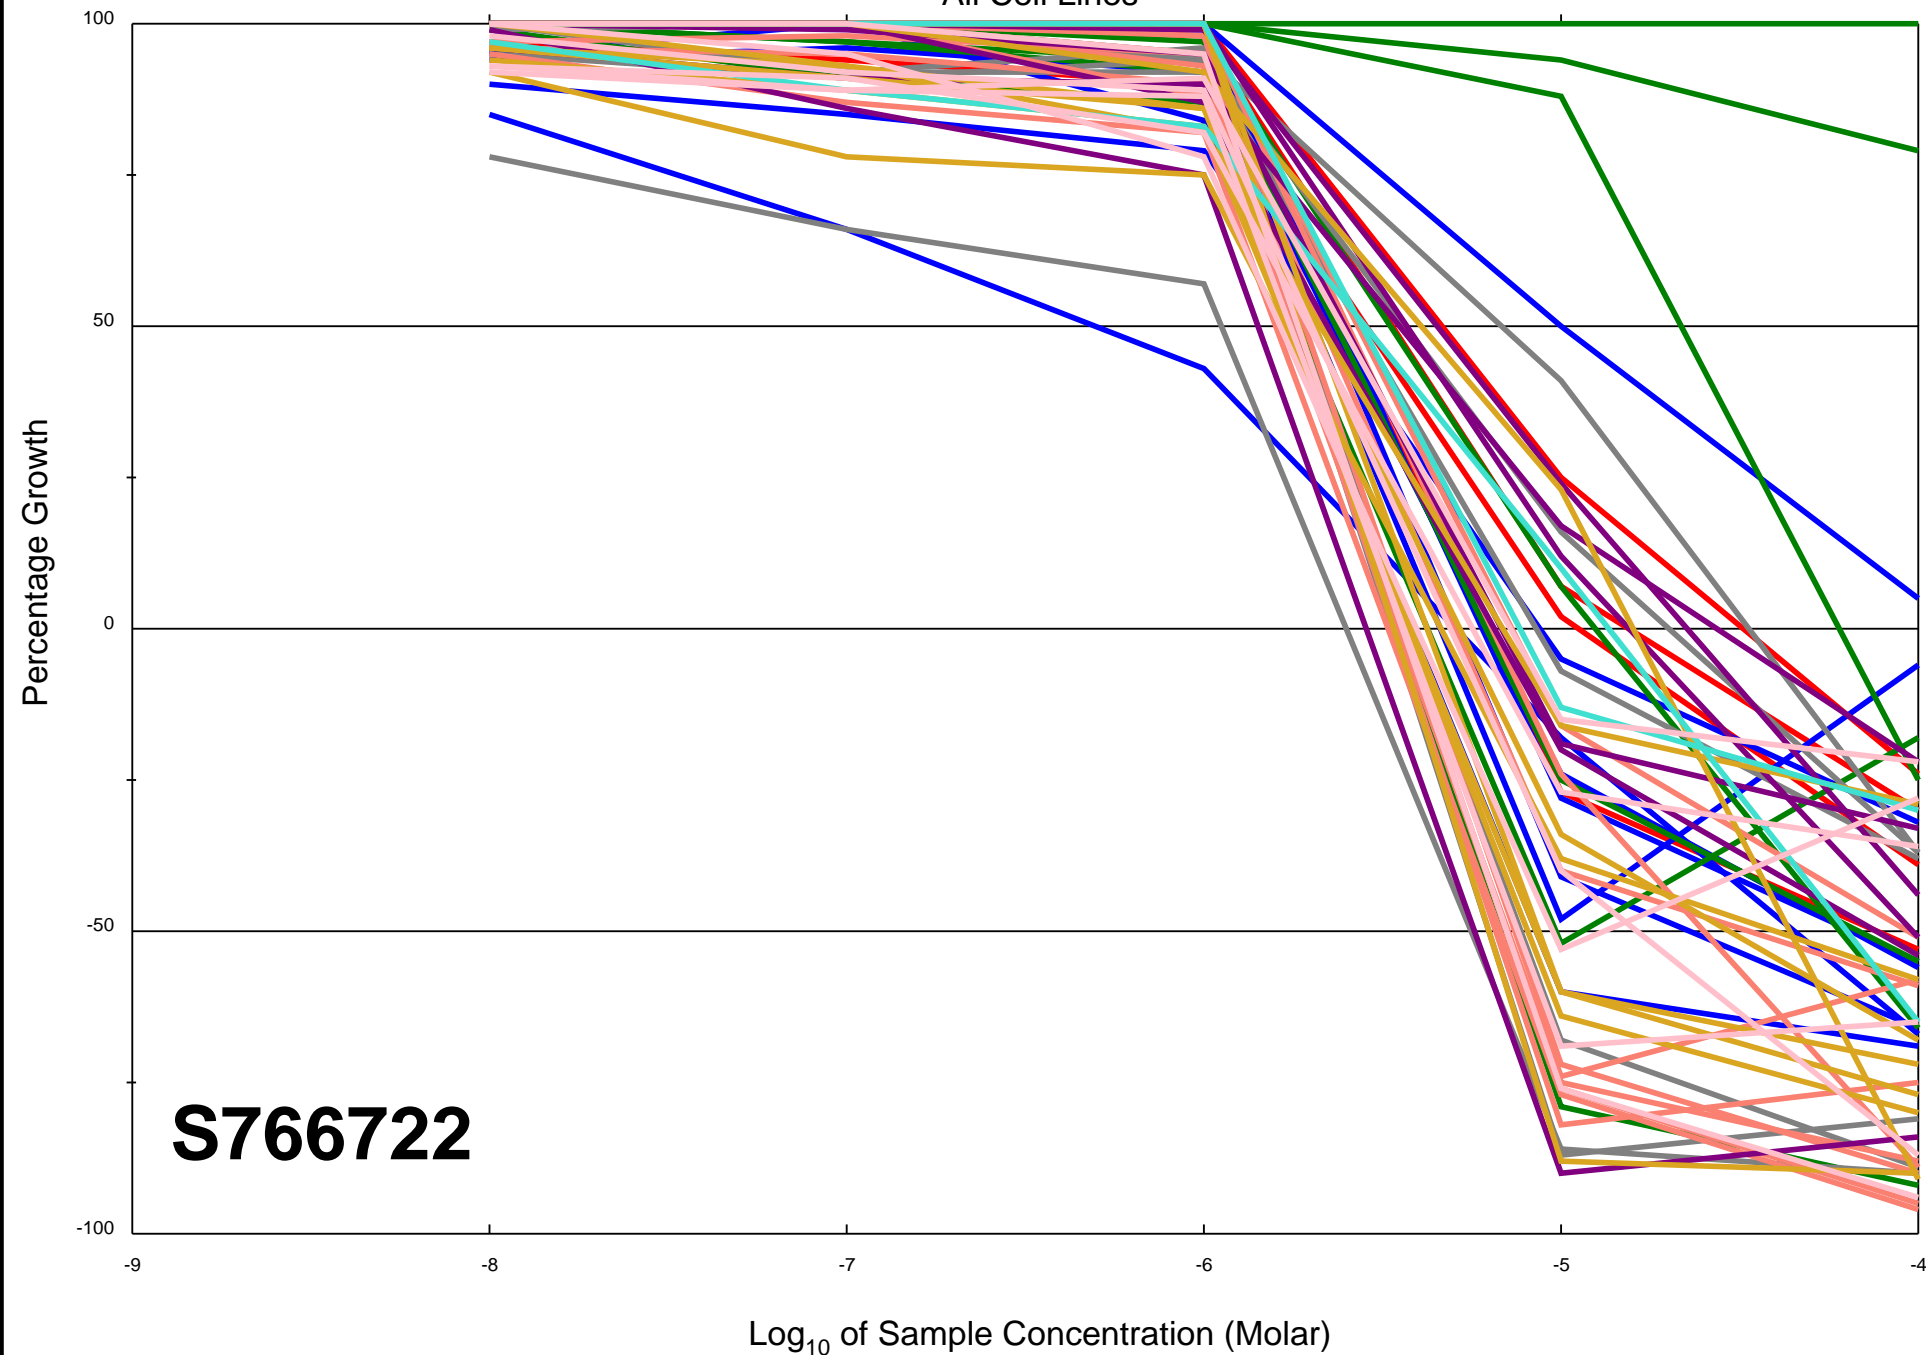

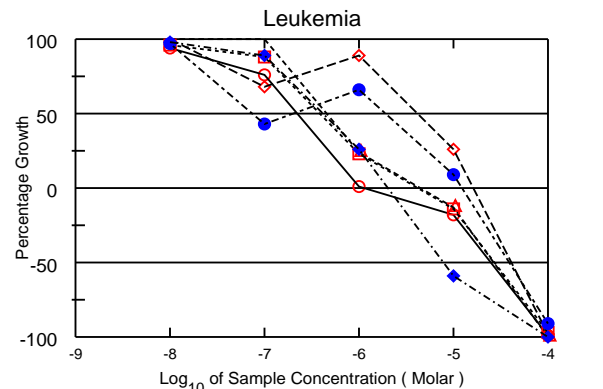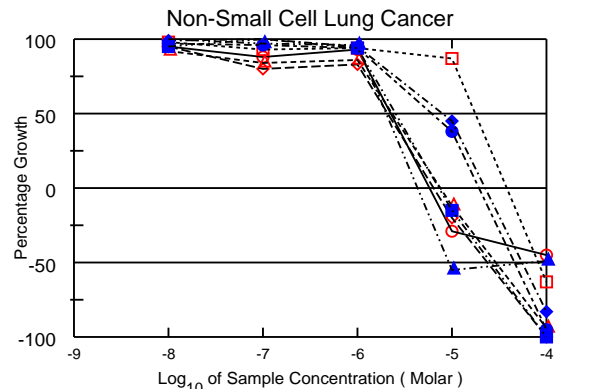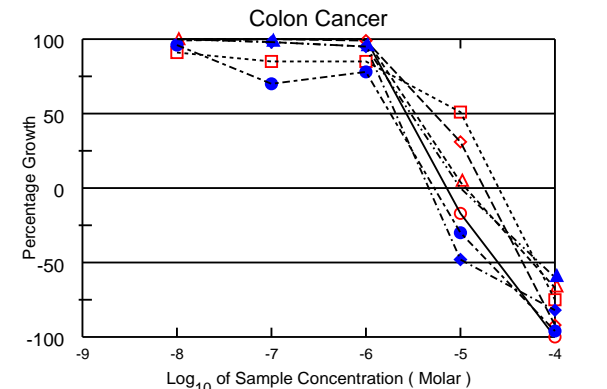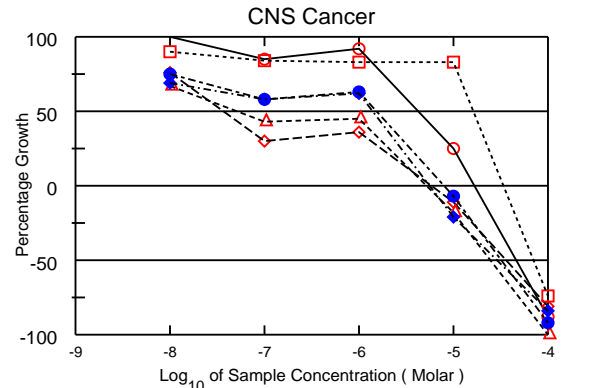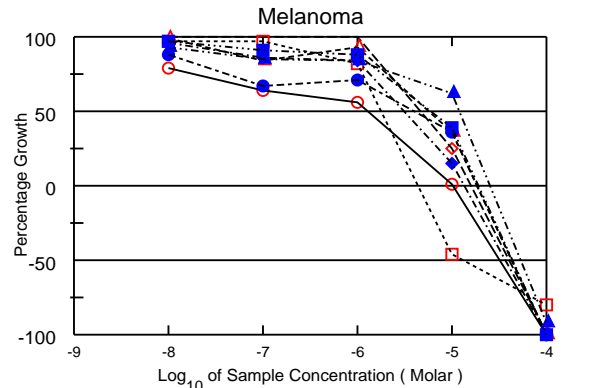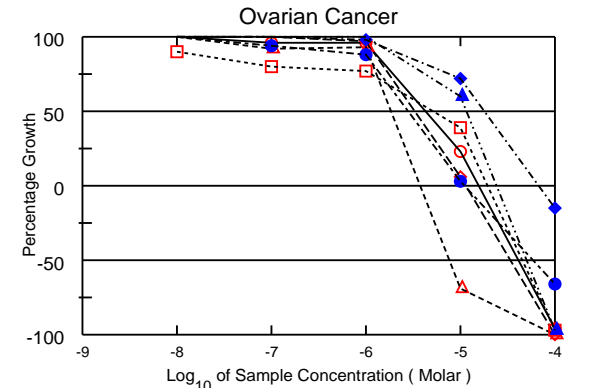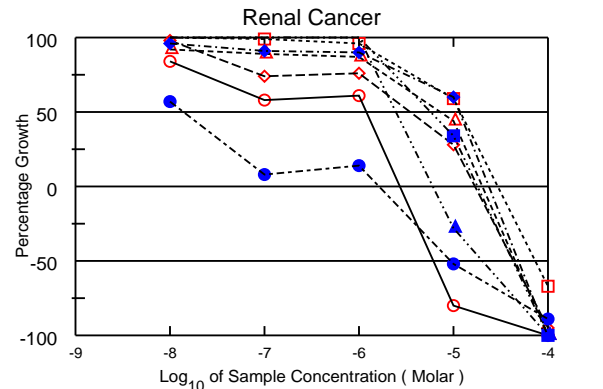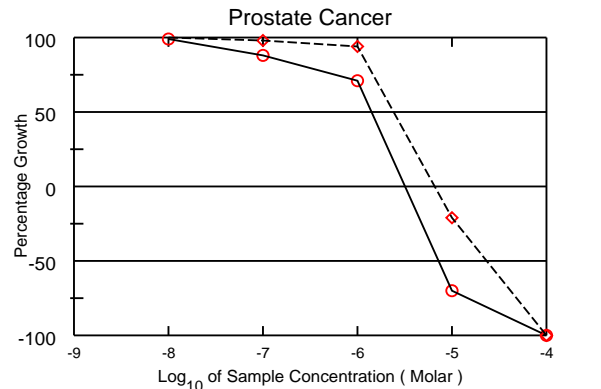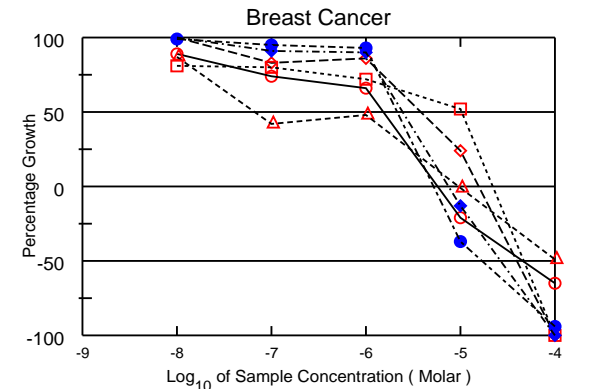

| National Cancer Institute Developmental Therapeutics Program |                        |      | NSC :766755/2              |     | Units :Molar           |      | SSPL :0YQS                   |  | EXP. ID :1302NS28 |  |
|--------------------------------------------------------------|------------------------|------|----------------------------|-----|------------------------|------|------------------------------|--|-------------------|--|
| Mean Graphs                                                  |                        |      | Report Date :July 13, 2015 |     |                        |      | Test Date :February 25, 2013 |  |                   |  |
| Panel/Cell Line                                              | Log <sub>10</sub> GI50 | GI50 | Log <sub>10</sub> TGI      | TGI | Log <sub>10</sub> LC50 | LC50 |                              |  |                   |  |
| Leukemia                                                     |                        |      |                            |     |                        |      |                              |  |                   |  |
| CCRF-CEM                                                     | -6.66                  |      | -5.94                      |     | -4.60                  |      |                              |  |                   |  |
| HL-60(TB)                                                    | -5.38                  |      | -4.79                      |     | -4.39                  |      |                              |  |                   |  |
| K-562                                                        | -6.31                  |      | -5.34                      |     | -4.57                  |      |                              |  |                   |  |
| MOLT-4                                                       | -6.41                  |      | -5.37                      |     | -4.56                  |      |                              |  |                   |  |
| RPMI-8226                                                    |                        |      | -4.91                      |     | -4.41                  |      |                              |  |                   |  |
| SR                                                           | -6.38                  |      | -5.69                      |     | -5.11                  |      |                              |  |                   |  |
| Non-Small Cell Lung Cancer                                   |                        |      |                            |     |                        |      |                              |  |                   |  |
| A549/ATCC                                                    | -5.64                  |      | -5.24                      |     | > -4.00                |      |                              |  |                   |  |
| HOP-62                                                       | -5.68                  |      | -5.19                      |     | -4.62                  |      |                              |  |                   |  |
| HOP-92                                                       | -5.63                  |      | -5.12                      |     | -4.54                  |      |                              |  |                   |  |
| NCI-H226                                                     | -4.75                  |      | -4.42                      |     | -4.09                  |      |                              |  |                   |  |
| NCI-H23                                                      | -5.21                  |      | -4.71                      |     | -4.34                  |      |                              |  |                   |  |
| NCI-H322M                                                    | -5.09                  |      | -4.65                      |     | -4.26                  |      |                              |  |                   |  |
| NCI-H460                                                     | -5.70                  |      | -5.36                      |     |                        |      |                              |  |                   |  |
| NCI-H522                                                     | -5.60                  |      | -5.14                      |     | -4.59                  |      |                              |  |                   |  |
| Colon Cancer                                                 |                        |      |                            |     |                        |      |                              |  |                   |  |
| COLO 205                                                     | -5.56                  |      | -5.15                      |     | -4.61                  |      |                              |  |                   |  |
| HCC-2998                                                     | -5.28                  |      | -4.75                      |     | -4.34                  |      |                              |  |                   |  |
| HCT-116                                                      | -5.48                  |      | -4.94                      |     | -4.24                  |      |                              |  |                   |  |
| HCT-15                                                       | -4.99                  |      | -4.60                      |     | -4.20                  |      |                              |  |                   |  |
| HT29                                                         | -5.74                  |      | -5.28                      |     | -4.70                  |      |                              |  |                   |  |
| KM12                                                         | -5.68                  |      | -5.33                      |     | -4.93                  |      |                              |  |                   |  |
| SW-620                                                       | -5.53                  |      | -5.00                      |     | -4.16                  |      |                              |  |                   |  |
| CNS Cancer                                                   |                        |      |                            |     |                        |      |                              |  |                   |  |
| SF-268                                                       | -5.37                  |      | -4.78                      |     | -4.34                  |      |                              |  |                   |  |
| SF-295                                                       | -7.43                  |      | -5.23                      |     | -4.44                  |      |                              |  |                   |  |
| SF-539                                                       | -7.28                  |      | -5.29                      |     | -4.61                  |      |                              |  |                   |  |
| SNB-19                                                       | -4.79                  |      | -4.47                      |     | -4.15                  |      |                              |  |                   |  |
| SNB-75                                                       | -5.82                  |      | -5.10                      |     | -4.50                  |      |                              |  |                   |  |
| U251                                                         | -5.86                  |      | -5.25                      |     | -4.54                  |      |                              |  |                   |  |
| Melanoma                                                     |                        |      |                            |     |                        |      |                              |  |                   |  |
| LOX IMVI                                                     | -5.90                  |      | -4.99                      |     | -4.49                  |      |                              |  |                   |  |
| MALME-3M                                                     | -5.29                  |      | -4.80                      |     | -4.39                  |      |                              |  |                   |  |
| M14                                                          | -5.24                  |      | -4.73                      |     | -4.37                  |      |                              |  |                   |  |
| MDA-MB-435                                                   | -5.75                  |      | -5.36                      |     | -4.88                  |      |                              |  |                   |  |
| SK-MEL-28                                                    | -5.40                  |      | -4.73                      |     | -4.37                  |      |                              |  |                   |  |
| SK-MEL-5                                                     | -5.51                  |      | -4.87                      |     | -4.43                  |      |                              |  |                   |  |
| UACC-257                                                     | -4.92                  |      | -4.60                      |     | -4.27                  |      |                              |  |                   |  |
| UACC-62                                                      | -5.23                  |      | -4.72                      |     | -4.36                  |      |                              |  |                   |  |
| Ovarian Cancer                                               |                        |      |                            |     |                        |      |                              |  |                   |  |
| IGROV1                                                       | -5.37                  |      | -4.81                      |     | -4.39                  |      |                              |  |                   |  |
| OVCAR-3                                                      | -5.48                  |      | -4.94                      |     | -4.47                  |      |                              |  |                   |  |
| OVCAR-4                                                      | -5.74                  |      | -5.43                      |     | -5.12                  |      |                              |  |                   |  |
| OVCAR-5                                                      | -5.28                  |      | -4.71                      |     | -4.34                  |      |                              |  |                   |  |
| OVCAR-8                                                      | -5.55                  |      | -4.95                      |     | -4.23                  |      |                              |  |                   |  |
| NCI/ADR-RES                                                  | -4.75                  |      | -4.17                      |     | > -4.00                |      |                              |  |                   |  |
| SK-OV-3                                                      | -4.93                  |      | -4.62                      |     | -4.30                  |      |                              |  |                   |  |
| Renal Cancer                                                 |                        |      |                            |     |                        |      |                              |  |                   |  |
| 786-0                                                        | -5.92                  |      | -5.57                      |     | -5.21                  |      |                              |  |                   |  |
| A498                                                         | -5.46                  |      | -4.77                      |     | -4.37                  |      |                              |  |                   |  |
| ACHN                                                         | -5.14                  |      | -4.69                      |     | -4.35                  |      |                              |  |                   |  |
| CAKI-1                                                       | -4.93                  |      | -4.53                      |     | -4.13                  |      |                              |  |                   |  |
| RXF 393                                                      | -7.86                  |      | -5.79                      |     | -5.04                  |      |                              |  |                   |  |
| SN12C                                                        | -4.94                  |      | -4.62                      |     | -4.31                  |      |                              |  |                   |  |
| TK-10                                                        | -5.59                  |      | -5.21                      |     | -4.70                  |      |                              |  |                   |  |
| UO-31                                                        | -5.19                  |      | -4.75                      |     | -4.37                  |      |                              |  |                   |  |
| Prostate Cancer                                              |                        |      |                            |     |                        |      |                              |  |                   |  |
| PC-3                                                         | -5.85                  |      | -5.50                      |     | -5.14                  |      |                              |  |                   |  |
| DU-145                                                       | -5.62                  |      | -5.18                      |     | -4.63                  |      |                              |  |                   |  |
| Breast Cancer                                                |                        |      |                            |     |                        |      |                              |  |                   |  |
| MCF7                                                         | -5.82                  |      | -5.24                      |     | -4.34                  |      |                              |  |                   |  |
| MDA-MB-231/ATCC                                              | -5.42                  |      | -4.81                      |     | -4.40                  |      |                              |  |                   |  |
| HS 578T                                                      | -7.18                  |      | -5.02                      |     | > -4.00                |      |                              |  |                   |  |
| BT-549                                                       | -4.98                  |      | -4.66                      |     | -4.33                  |      |                              |  |                   |  |
| T-47D                                                        | -5.67                  |      | -5.28                      |     | -4.77                  |      |                              |  |                   |  |
| MDA-MB-468                                                   | -5.62                  |      | -5.13                      |     | -4.58                  |      |                              |  |                   |  |

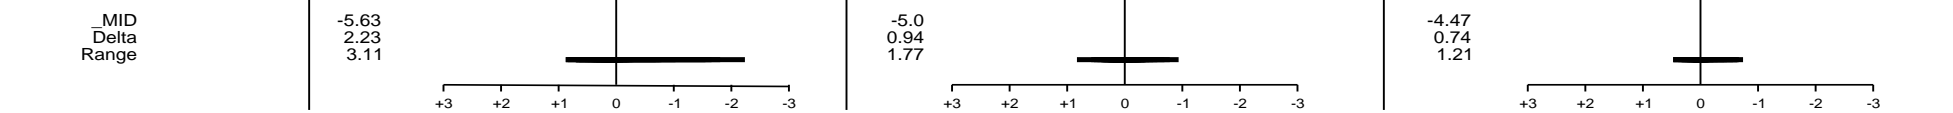

All Cell Lines

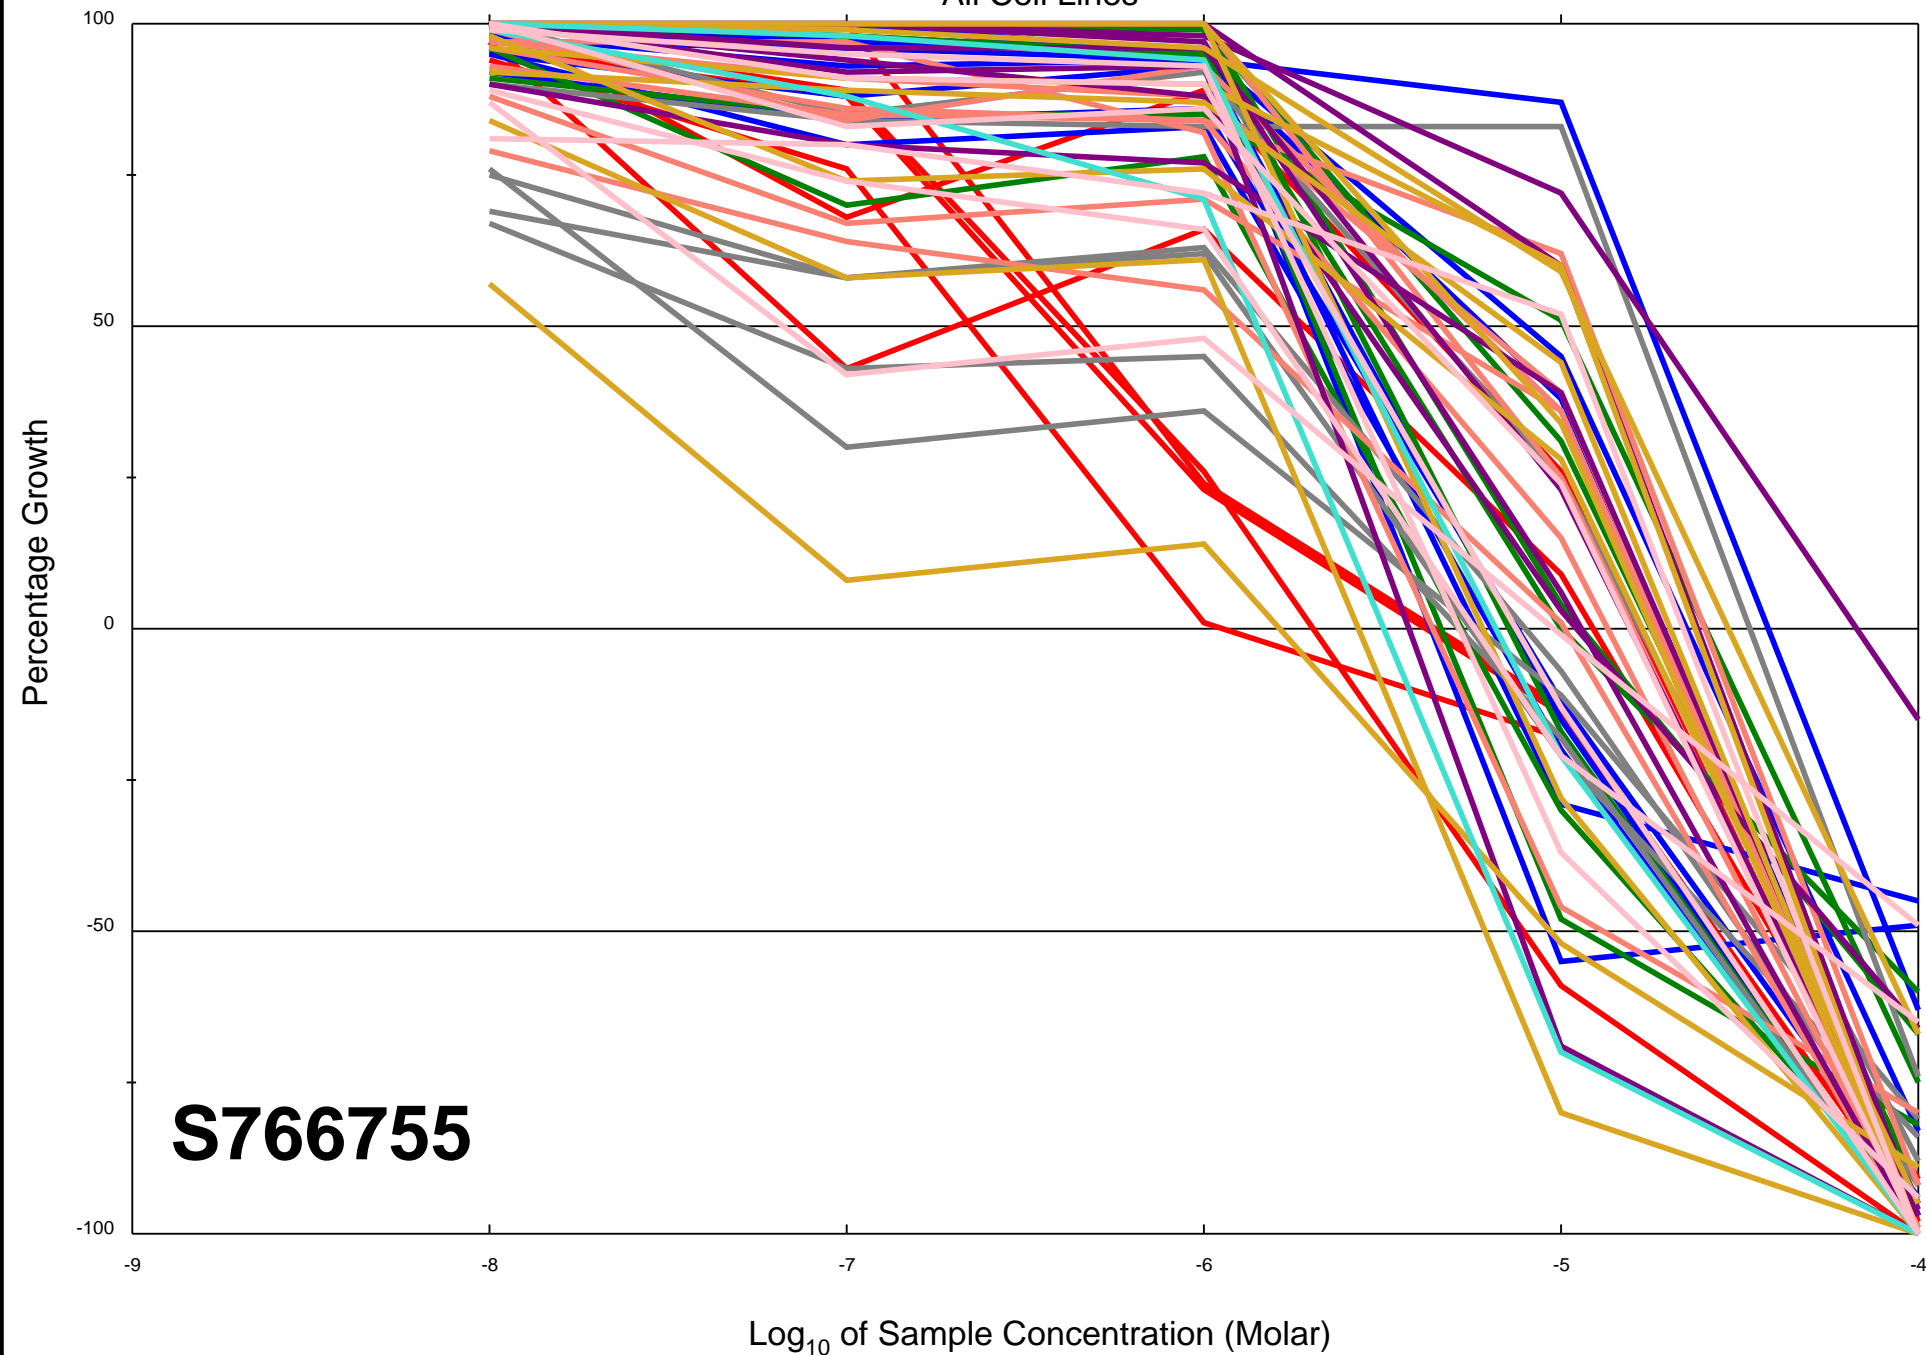

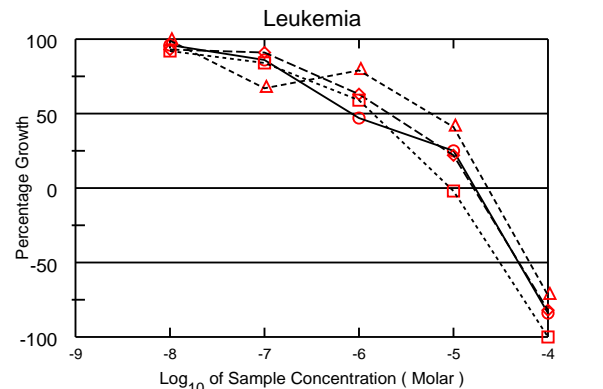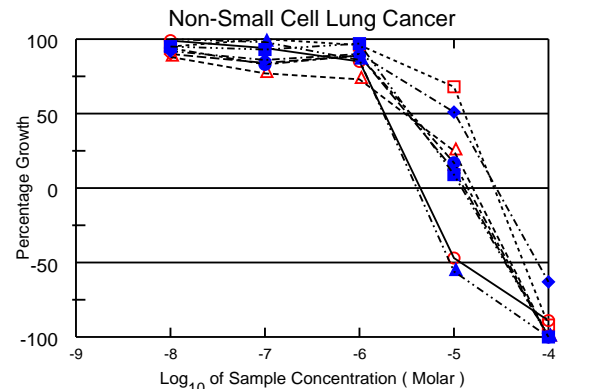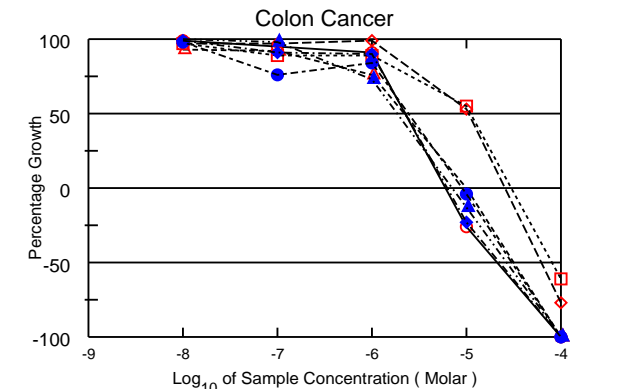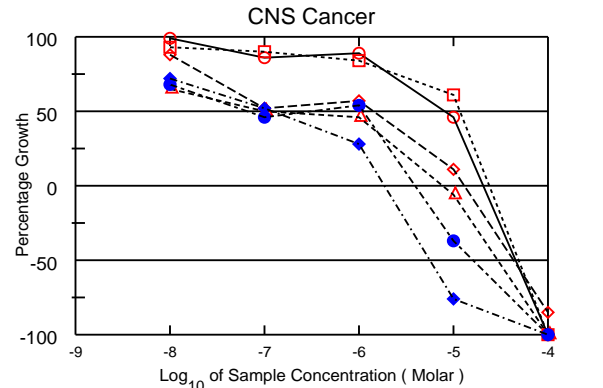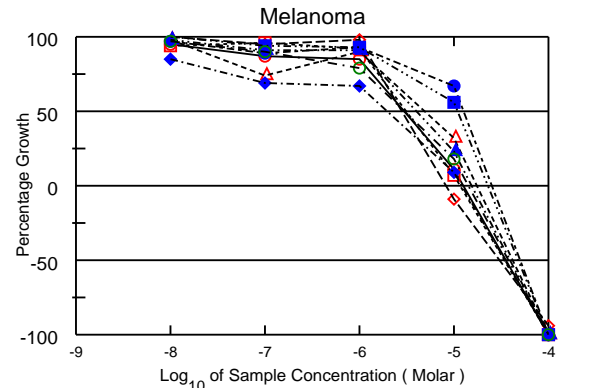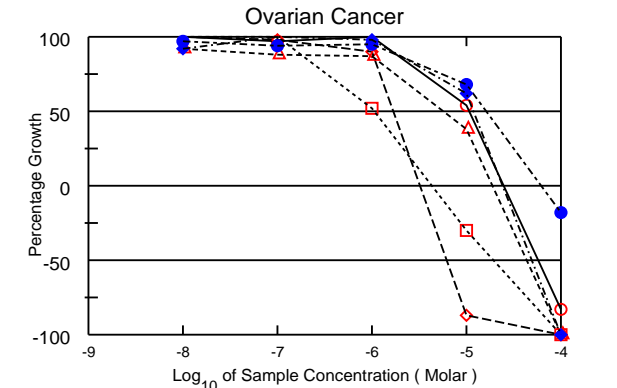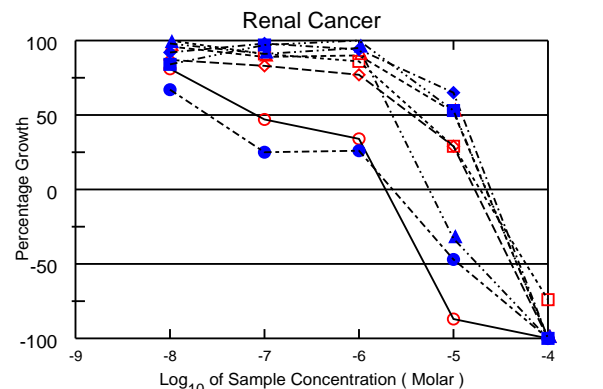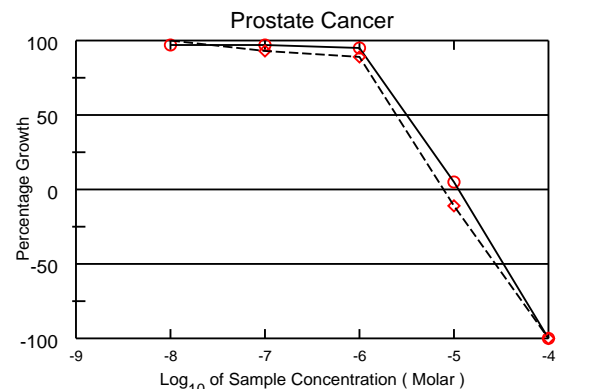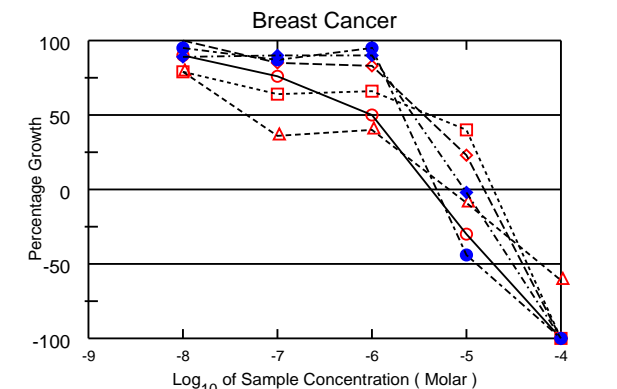

Test Date :June 03, 2013

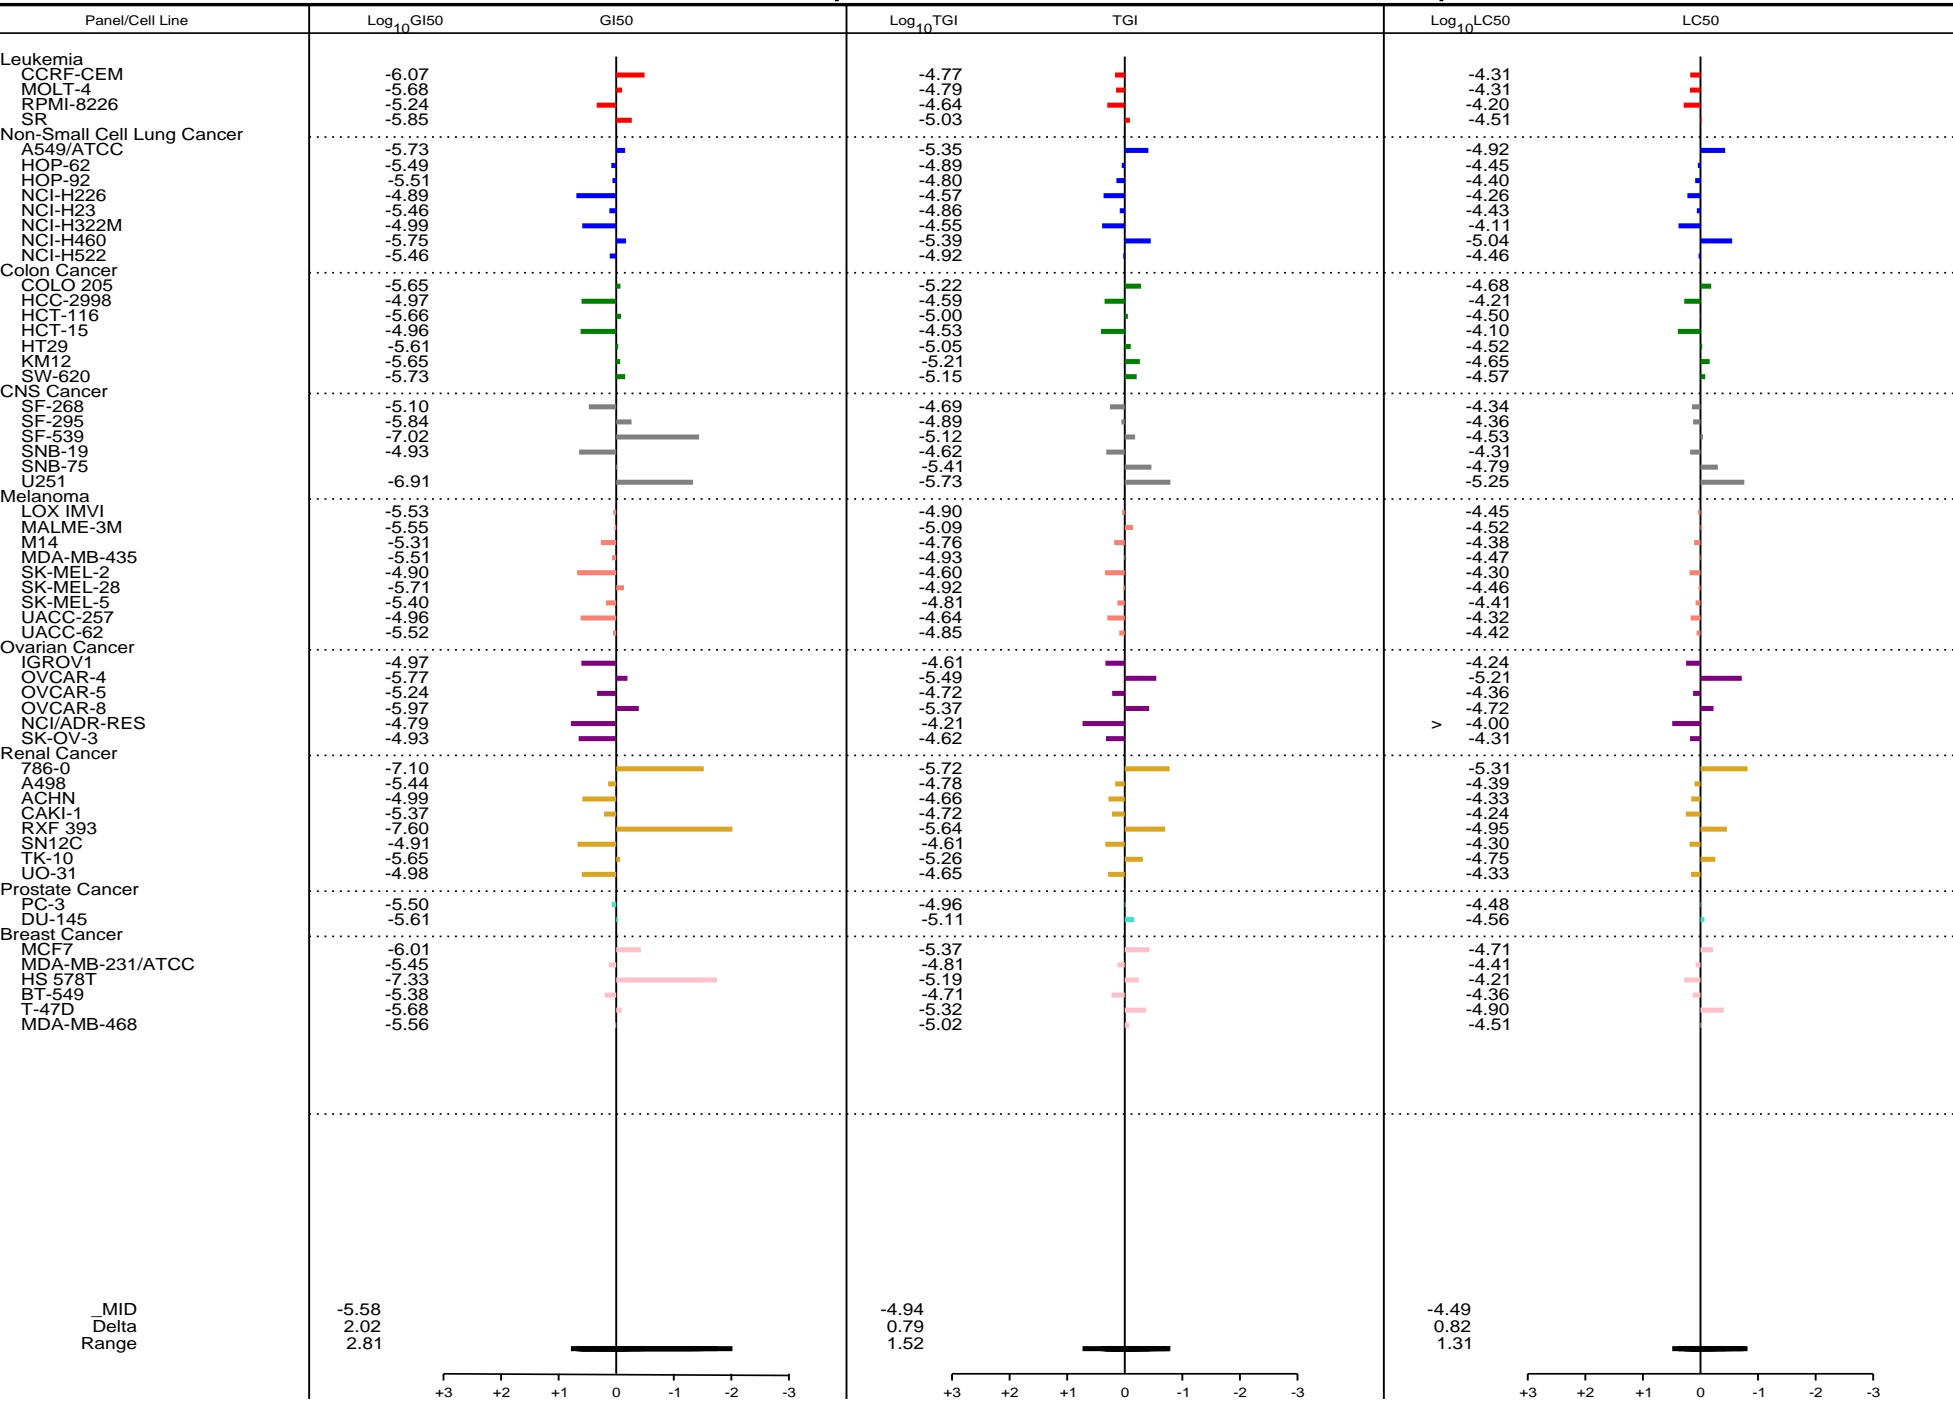

All Cell Lines

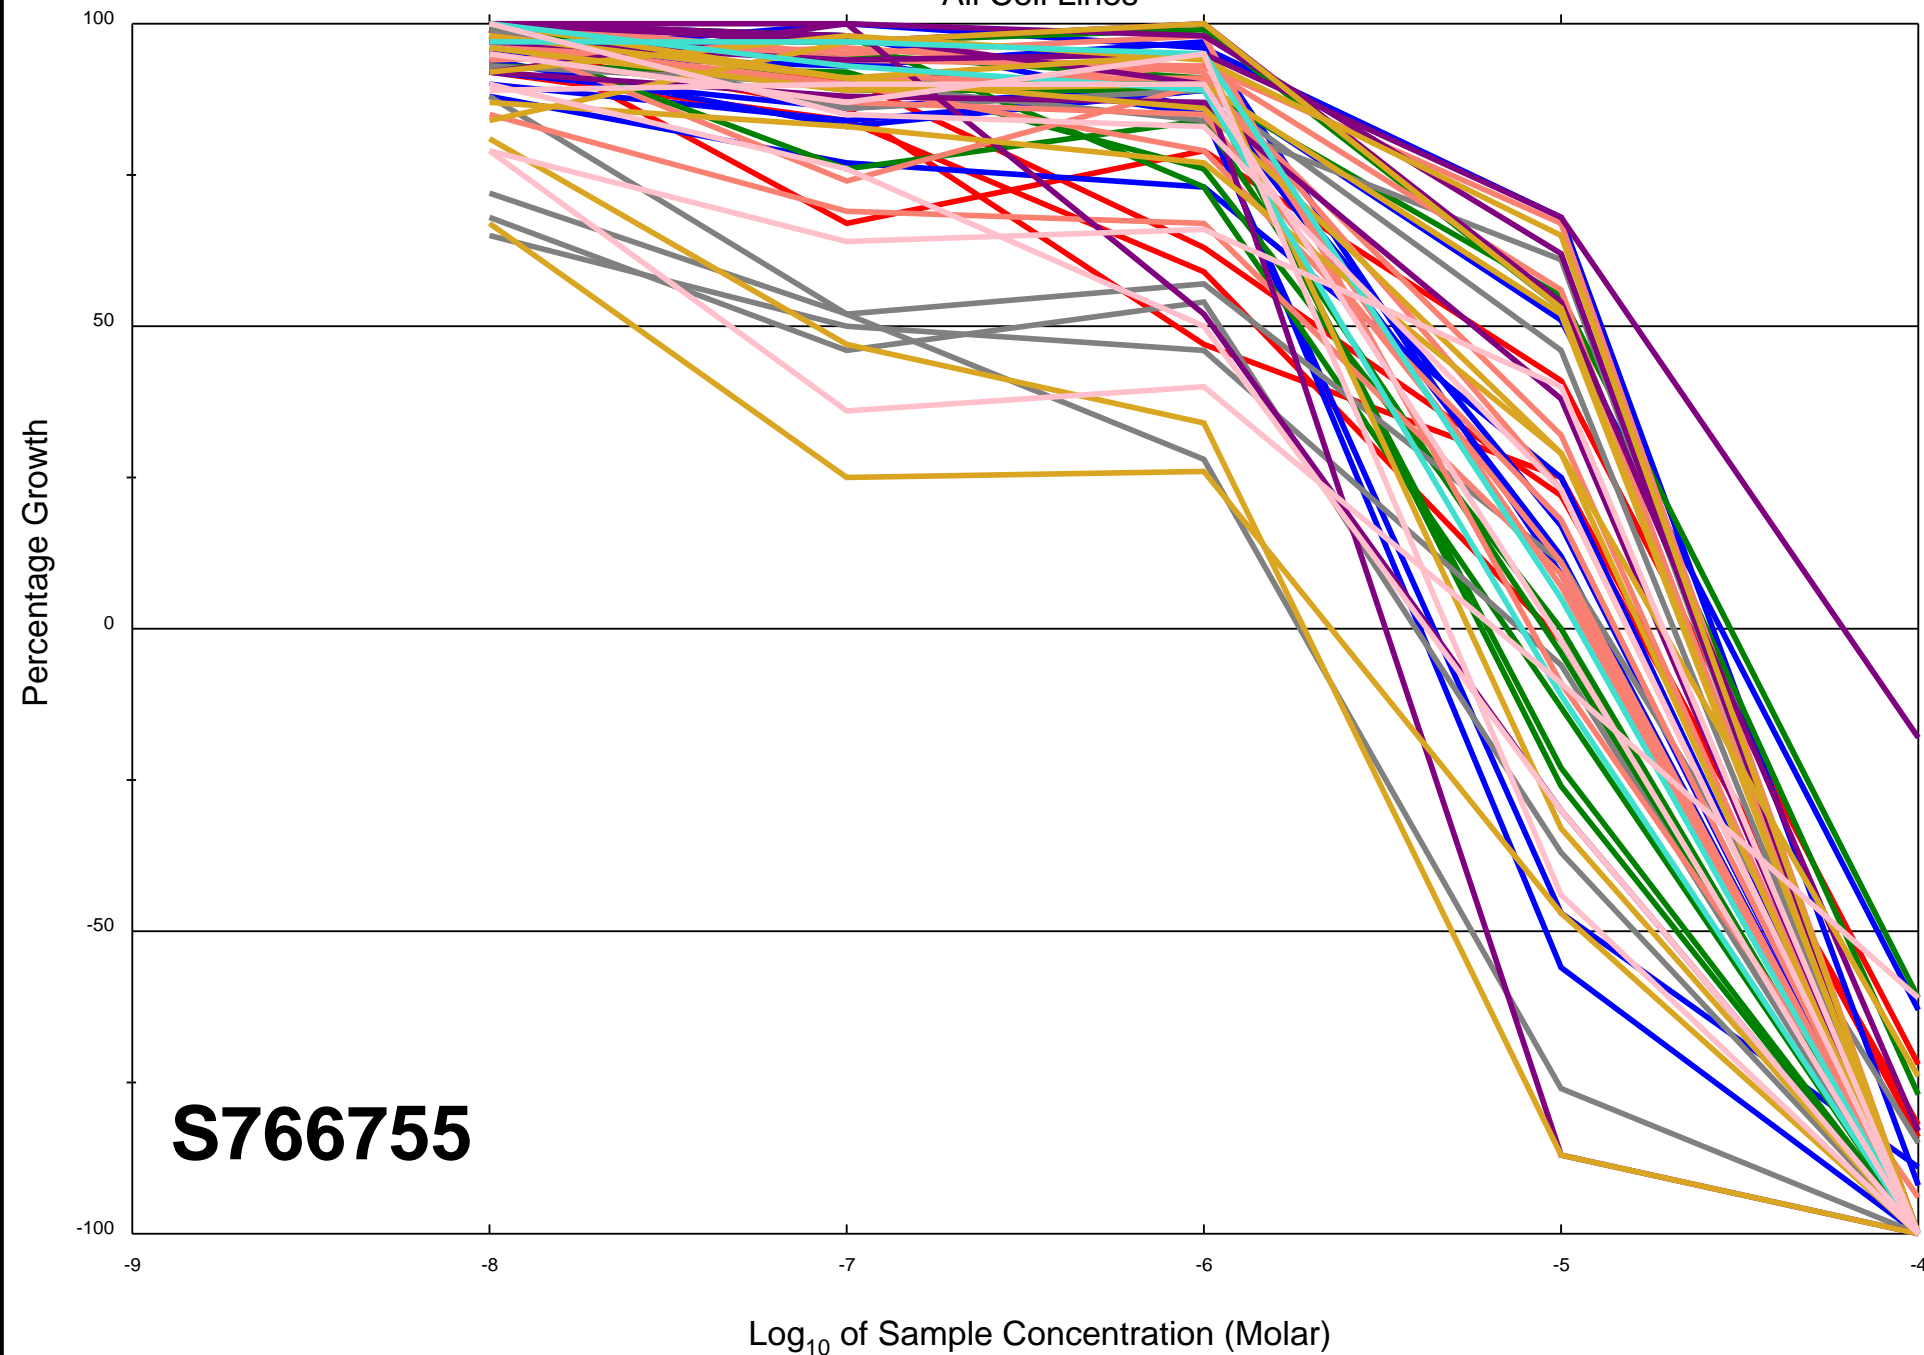

Supplement: S1 Text — (PDF) [file ppat.1005763.s006.pdf]
