# Supplementary material for: Open Source Drug Discovery with the Malaria Box Compound Collection for Neglected Diseases and Beyond
Source: PLoS Pathog. 2016 Jul 28;12(7):e1005763. doi: 10.1371/journal.ppat.1005763 (PMC4965013; doi:10.1371/journal.ppat.1005763)
Supplement: S2 Table — The file is ordered as shown in Fig 2A and shows log2 fold changes compared to an untreated control. Positive and negative values indicate increase and decrease, respectively, as compared to the control. (XLSX) [file ppat.1005763.s003.xlsx]

## Sheet: S2 Table Metabolomics
S2 Table Metabolomics	MMV665805	MMV665820	MMV001038	MMV006455	MMV007839	MMV665831	MMV665785	MMV019406	MMV000570	MMV665841	MMV085583	MMV020788	MMV665782	MMV665941	MMV006558	MMV009063	MMV008416	MMV008956	MMV007695	MMV666607	MMV666101	MMV019110	MMV396672	MMV019871	MMV007384	MMV020548	MMV007686	MMV085203	MMV001246	MMV006203	MMV666023	MMV666600	MMV665916	MMV008138	MMV000448	MMV666062	MMV665915	MMV006278	MMV007160	MMV666688	MMV396693	MMV007907	MMV019066	MMV666601	MMV020885	MMV006861	MMV020492	MMV006087	MMV396703
Cluster
dihydroorotate	-0.846085	-2.92091	2.21951	-1.04246	-1.4167	-1.75904	-0.97616	-2.24155	-1.82737	-0.738091	-0.669663	-1.00245	-0.944195	-0.776073	-0.374549	-0.326462	0.22943	1.1855	-0.0740958	0.13261	0.347628	1.06926	1.3113	0.616268	0.346144	0.114781	0.0415643	-0.443528	0.848432	0.491352	1.30961	0.226499	0.194983	0.209559	-0.0300746	-0.212985	-0.467165	0.102894	1.08248	2.24213	0.391397	0.654058	0.242987	0.0512681	0.421146	0.311037	0.280891	0.154077	1.73611
N-carbamoyl-L-aspartate	-1.05595	-3.84156	2.2667	-1.35797	-1.79511	-1.99238	-1.54596	-2.29773	-1.95558	-0.955033	-0.559726	-1.52601	-1.04113	-0.919698	-1.70242	-0.315374	0.365231	0.57102	0.345835	0.229849	-0.00222391	0.871751	1.50093	0.0850303	-0.0976552	0.0162654	-0.154518	-0.0395306	0.81667	0.411212	1.05176	0.504329	-0.209685	0.143958	-0.218043	-0.295134	0.0529952	0.0433932	1.35039	1.4864	0.203616	0.44769	0.0533647	0.0308784	0.249897	0.0946057	0.146113	0.240831	1.14829
DLS/SDL/SID	-2.37617	-1.69419	-1.16152	-1.24247	-1.10972	-4.31047	-3.00213	-1.84093	-2.97979	-2.0523	-2.55868	-2.35173	-1.54537	-0.785796	-1.66197	-0.242341	0.350891	-0.58281	0.23116	-0.614996	0.354831	-0.882504	0.494507	-0.76949	-1.76083	-1.10011	0.0617293	0.21499	-0.119055	-0.549701	-0.417753	0.127799	-0.122274	0.00765674	0.0691912	-0.331461	-0.249797	-0.106739	0.227795	-0.0767638	0.0766106	-0.0355909	-0.34112	-0.0704701	0.0251962	0.0889477	0.0885548	-1.64526	-3.00849
DLH	-3.43	-2.46354	-3.03831	-3.33269	-0.618558	-5.28663	-3.57879	-2.27528	-3.48617	-2.22329	-2.50045	-2.98242	-2.12958	-0.3436	-1.61654	-0.86742	-1.00578	-3.71086	0.436535	-0.855391	0.344331	-1.2334	0.245371	-1.43674	-1.97089	-1.53148	0.363111	0.0561788	-0.16384	-0.311145	-0.403015	0.483733	-0.39056	-0.154639	-0.218556	-0.00623817	0.0710048	0.115123	0.133352	-0.101384	0.012594	-0.144281	-0.214366	-0.0488459	0.11306	0.0961108	0.100471	-1.60932	-2.82527
PVNF	-3.29088	-2.46429	-1.54666	-1.50278	-0.334204	-4.96394	-4.04266	-2.25112	-3.66553	-2.26743	-3.32887	-2.84456	-2.20104	-0.996732	-2.30822	-0.611462	0.221536	-0.871996	0.295628	-1.15043	0.327869	-0.854054	0.479162	-1.35789	-1.58881	-1.32661	0.459132	0.0510381	-0.258734	-0.300113	-0.673147	0.206007	-0.311766	-0.0629959	0.272454	-0.0934072	0.0243592	-0.218581	0.216667	-0.139944	0.147782	0.228738	-0.189527	-0.122666	0.0658751	-0.0730675	0.104731	-2.10376	-2.30864
PEE	-1.27207	-1.0444	-5.81432	-6.25922	-0.163501	-3.83358	-3.58199	-2.26192	-2.97649	-2.46484	-2.9857	-2.85598	-2.09737	-0.896049	-0.269683	-0.72444	-0.981428	-0.813029	0.340791	-0.907409	0.269742	-0.294002	0.383421	-0.464063	-1.3661	-0.76516	-0.127876	0.00220796	0.273366	-0.143063	0.0889051	0.496221	0.296818	0.561535	0.972094	-0.0183436	-0.0211153	0.0936275	-0.111755	-0.109098	-0.0547568	-0.423532	0.00220012	-0.132675	-0.0218467	0.199156	0.0435296	0.81881	-0.128399
PD	-4.25619	-4.27954	-0.211598	-1.74106	0.583797	-4.8541	-3.49123	-2.35435	-3.42567	-2.50557	-2.73466	-3.14997	-2.30273	-0.96161	-0.919586	-0.884142	0.435882	-0.493771	-1.42032	-0.453673	0.0101779	-0.650191	-0.206249	-0.933031	-1.29634	-1.14735	-0.245633	-0.139445	1.08536	-0.264229	0.507507	0.213947	0.125474	0.254534	0.357972	-0.348694	-0.322937	-0.192301	-0.164054	0.0119398	0.00970933	-0.707465	0.095764	-0.0201219	-0.0120394	0.00848658	0.12968	-0.524102	-0.505398
Acetyllysine	-2.65467	-2.34507	-1.73583	-1.83993	-0.149478	-3.55872	-3.15014	-2.51855	-3.5798	-2.61202	-3.23335	-2.88482	-2.2147	-1.01722	-2.93816	-0.969699	0.291458	-0.894353	-0.273671	-1.03501	-0.112907	-0.786116	-0.341196	-0.88764	-1.26203	-1.07378	-0.602092	0.533818	0.45322	0.087862	0.585281	0.265827	0.36384	0.538675	-0.609616	-0.170873	-0.177095	-0.273805	0.35478	-0.162428	-0.150545	-0.391646	0.0773472	-0.456016	-0.201842	0.00115532	-0.0147005	-0.670866	-0.269105
N-acetyl-L-ornithine	-3.16504	-3.27676	-0.833835	-1.41203	-0.363306	-2.77527	-2.31085	-1.51092	-2.11048	-1.94936	-2.90563	-2.95422	-2.34758	-0.759743	-1.96426	-0.415369	0.336393	-0.591637	-0.458322	-1.15125	0.160875	-0.306589	0.0440599	-0.120871	-1.16151	-0.700223	-0.524659	0.417038	0.40871	0.00289574	0.305972	0.382618	0.394294	0.550296	-0.196555	-0.323996	-0.305899	-0.338703	0.332452	-0.0420954	-0.0144928	-0.270462	-0.0528953	-0.178139	0.0587912	0.120248	-0.0519059	-0.315764	-0.216754
dCMP	-0.000174593	-0.000174593	-0.632396	-0.670898	-0.861156	-0.776856	-0.234893	-0.0903946	-0.637664	0.377986	-0.455239	-0.368522	-0.373693	-0.804483	-1.60028	4.93769	3.61295	4.61897	-0.000174593	0.158331	0.380362	-1.06758	-0.670724	-0.136834	0.0788338	0.224648	0.216624	-0.301784	1.31595	0.299146	-0.420477	0.730278	-0.128334	0.154051	0.0598971	-0.726318	-0.28655	0.0519894	0.0926535	-0.0689991	-0.244978	-0.333764	-0.485138	0.0159812	-0.18287	0.276792	0.12573	0.418721	-0.606595
dTTP	-1.80816	-2.5615	-1.23996	-0.43809	-0.19153	-0.536101	0.116391	-0.408152	-0.745991	0.339182	0.106705	-0.254008	-0.0374044	0.289243	-0.377628	1.89588	0.4804	1.15642	0.0116207	0.446873	0.242485	-0.142004	-0.0268335	0.318244	-0.456059	-0.426832	-0.29776	0.0987893	0.605029	0.211265	-0.234229	0.10619	0.102773	0.285652	0.11502	-0.234357	-0.172103	0.131509	0.259271	-0.481503	0.00806864	0.0488664	-0.210581	-0.0261464	0.083557	-0.0753456	0.0827871	-0.428928	-0.447995
dAMP	-0.265942	-0.839752	0.663849	1.1553	-1.53678	-1.50329	-0.240329	0.284036	0.0991885	-0.533754	0.259572	0.308952	0.358464	-0.152757	-0.965127	0.917823	0.576168	1.24282	0.454046	0.340269	-0.262906	0.170535	-0.154701	0.669615	0.685468	0.703885	-0.475034	0.213357	0.56229	0.739651	0.601336	0.179721	0.533455	0.613539	-0.0772767	-0.487487	-0.465257	-0.259211	0.0194415	0.0321842	0.376816	-0.0500818	-0.341804	-0.218578	-0.0763338	-0.192903	0.0555728	1.73163	0.703052
dTDP	-0.415561	-1.2684	0.504356	0.712793	-1.86542	-0.14296	-0.551151	0.105662	0.15812	-0.0985688	-0.35821	-0.0621155	-0.0473809	-0.369302	-0.823567	0.709827	0.459149	1.14594	0.622544	0.00516254	0.0399621	-0.285309	-0.229534	0.799041	0.0732879	0.102163	-0.818188	0.155467	1.00309	0.82164	0.350687	0.68465	0.283684	0.721397	-0.272421	-0.198476	0.076647	-0.295509	0.248816	-0.497914	-0.282603	-0.424502	0.163363	-0.291249	-0.0815918	0.0365593	0.250521	0.199914	0.130065
dTMP	0.167991	-0.558631	1.02753	1.28556	-1.85484	0.0908811	-0.259962	0.00403709	0.0023479	-0.084937	-0.926463	-0.158118	-0.262344	-0.372412	-0.618343	0.670283	0.908317	1.43926	0.173885	-0.36277	0.00270116	-0.480601	-0.113186	0.819623	0.125899	0.0122114	-0.710025	0.309107	1.15456	0.844375	0.871397	0.356302	0.191131	0.483034	-0.140132	-0.699131	0.0890171	-0.278005	0.130481	-0.415719	-0.370367	-0.533728	0.123622	-0.282513	-0.0608503	0.110596	0.374186	1.79734	0.276798
NADPH	0.0178984	-0.298644	1.13258	1.24482	-0.400069	1.92279	0.984013	0.473574	0.566916	0.0709716	1.28413	0.0362543	0.259789	0.73292	1.44531	0.370026	0.885622	0.667244	1.83461	4.21557	-0.95072	1.0636	1.58988	0.609304	-0.918059	-0.758845	-0.644803	1.90534	-0.615163	0.030385	-0.0338571	-0.179141	-0.722241	0.48687	1.38745	-0.214881	0.121464	-0.15452	0.113524	0.240773	1.10055	1.50262	-0.387719	0.274972	0.388064	0.61324	1.07612	1.33168	-0.0937474
orotate	-0.315992	-2.38241	-0.0151885	-1.32572	-2.22387	-1.53449	-1.45637	-1.53364	-1.15786	-0.699119	-1.05766	-1.43459	-0.908931	-0.697083	-1.52226	-0.516421	-0.141713	-0.328416	0.78597	0.0544209	-0.884043	-0.726319	-0.237372	0.0669946	0.357053	0.239184	0.191261	-0.00622859	-0.0488189	0.105747	-0.62265	0.0746041	0.164792	0.120402	-0.512219	-0.719946	-0.418856	-0.0752812	0.846874	-0.339108	-0.350178	0.380287	-0.199987	-0.292098	-0.0716335	-0.209985	0.0368172	-0.409791	-0.221021
CDP	0.243297	-0.903755	-0.138218	0.5091	-1.95696	0.911866	0.177557	0.0559947	0.119862	-0.149694	-0.39115	0.196773	0.129086	-0.378138	-0.458031	0.514842	0.295055	1.06061	0.70804	-0.124851	0.0406441	-0.441261	-0.30826	0.871168	-0.348981	-0.067339	-1.12375	0.208746	1.16083	0.840174	0.113554	0.759773	0.242332	0.682717	0.0283737	-0.397814	0.23533	-0.17742	0.156543	-0.456029	-0.0636216	-0.459649	0.113554	-0.273249	-0.15735	0.0987838	0.183487	0.296933	0.161289
UDP	0.141767	-0.476993	0.704307	0.850482	-2.07659	0.46898	-0.186143	-0.0455529	0.206358	-0.164998	-0.839948	-0.332069	-0.271721	-0.748846	-0.191764	0.490976	0.726078	1.21402	0.647621	-0.295729	0.0708484	-0.533711	-0.327013	0.884447	-0.217238	-0.127652	-1.12051	0.121454	1.26976	0.893593	0.016967	0.712469	0.178257	0.715347	0.162249	-0.480574	0.122682	-0.23264	0.108156	-0.625294	-0.336923	-0.436397	0.0663145	-0.331521	-0.236704	0.146121	0.201272	-0.0118576	0.100828
UMP	-2.43284	-2.62905	-0.206308	-0.522317	-0.884915	-0.647151	-0.189664	-0.179494	-0.38647	0.0187899	-0.663087	-0.241016	-0.286599	-1.25915	-1.06275	0.462839	-0.173301	0.0306773	-1.86787	-0.0759117	0.114236	-0.139129	-1.30627	-0.599923	-0.388551	-0.0473062	0.736773	-0.109167	-0.224877	-0.495584	-0.429167	0.0201321	-0.63154	-0.137796	-0.152935	-0.396226	-0.731326	-0.317055	0.00873509	-0.0314304	-0.448035	-0.751816	0.451092	0.104908	0.279115	-0.129966	0.219057	-0.167495	-0.189672
UTP	-1.27565	-1.86914	-0.544522	-1.88925	-0.529489	0.0452215	-0.000426715	-0.26544	-0.556535	0.14877	-0.107282	-0.258184	0.0148383	-0.29466	-0.217833	0.408994	0.481878	0.581972	0.153485	0.305325	0.0386553	-0.186442	-0.142234	-0.206922	-0.609955	-0.476047	-0.519316	0.111193	0.207093	-0.408298	-0.423978	0.205999	0.295627	0.456624	0.069522	-0.142629	-0.0632619	0.0504207	0.148675	-0.188189	0.0376403	0.0195917	-0.213415	0.193799	-0.326774	-0.0645422	0.0185241	-0.423351	-0.366673
guanosine	-1.19199	-1.33169	-0.418149	-0.935105	-0.466043	-0.877631	-0.887138	-0.169303	-0.395425	-0.483498	-0.45312	-0.148989	0.177363	-0.833164	-2.47866	0.393761	-0.800252	-1.28617	-0.968429	0.140153	-0.939232	-2.15813	-1.98675	0.113236	0.339755	0.14174	-0.208277	0.567752	0.0356207	-0.0900461	-0.234705	-0.125218	-0.333469	-0.437802	-0.407924	-0.420604	-0.435261	-0.141058	0.887308	0.184896	0.137762	0.0589318	-0.120006	-0.0675307	0.124141	-0.210977	0.114046	-1.73542	0.573902
GMP	-1.40713	-1.71731	0.555396	-0.140368	-0.733208	-0.667975	-0.707689	-0.397509	-0.792117	0.743109	-0.473406	-0.0697511	-0.277577	-1.31395	-0.627767	0.119958	0.0233413	-0.49792	-0.910126	-0.0601365	0.611845	0.075797	-0.121035	0.00836607	-0.441822	0.0398746	0.960835	0.0651785	-0.26018	-0.562182	-0.643115	-0.290978	-0.759044	-0.645789	-0.257229	-0.358445	-0.664378	-0.357075	0.264925	0.254415	0.0860497	0.0842457	0.105811	0.175089	0.260599	0.601706	0.338571	0.0464486	-0.532688
Octoluse Bisphosphate	-2.62807	-4.19875	0.396302	0.119582	0.730638	-0.594499	0.0258775	-0.601479	-0.752103	-0.224632	-0.283324	-0.463333	-0.169925	-0.462194	0.194235	0.242051	0.390173	0.0866192	-1.5013	-0.096508	0.280685	-0.0905117	-0.087402	-0.50746	-0.707934	-0.508257	-0.132428	0.0588937	-0.0299306	-0.0917217	-0.141871	0.301342	0.539223	0.757043	-0.104955	-0.396295	-0.342731	-0.238315	0.294961	-0.157904	0.367636	-0.0905117	-0.221378	-0.0546007	0.10007	0.0691666	0.0695409	0.735713	-0.55684
sarcosine/alanine	-2.25014	-2.80999	-0.428364	-0.73487	0.441751	-1.23266	-1.43091	-1.23349	-1.67428	-1.29129	-0.916664	-1.08661	-0.868724	-0.458109	-0.282704	-0.0906605	0.488254	-0.379203	-1.81227	-0.0656538	0.0619195	-0.641323	-0.520358	-0.274668	-0.278919	0.0582751	0.175194	0.0342006	0.158311	0.184895	-0.0297838	-0.129967	0.290833	0.0542066	0.0317395	-0.563617	-0.511051	-0.279704	0.25162	-0.182187	0.602444	0.346599	0.0075946	-0.316783	-0.0460317	-0.00436989	0.351101	-0.809369	-0.173772
citrate/isocitrate	-0.776371	-0.642662	-0.768037	-1.1034	0.37987	0.0399458	-0.986179	0.00616199	-0.94055	-0.0341551	-0.251242	-0.278626	-0.172595	-0.226916	-0.478251	0.248428	-1.579	-0.70043	1.42053	-0.176548	-1.04006	-0.843226	-0.677293	-0.25213	1.28089	0.702757	0.667226	0.64818	0.613879	-0.312723	0.0411888	0.529381	-0.515507	-0.147632	-0.245122	-0.0719129	0.130583	0.0356251	0.407784	-0.0594305	1.40077	0.263956	-0.225678	0.498874	-0.00441759	-0.281492	-0.0288777	-0.567194	-0.0274067
xanthosine	0.476072	-0.0536697	-1.77634	-2.14259	-0.167566	-1.06873	-1.57461	-0.953619	-1.56579	-0.279967	0.125005	-0.465887	-0.0127951	-0.130961	-1.03245	-0.0862093	-0.891319	-1.52593	0.30401	0.0650554	-0.275234	-0.912607	-0.819597	-0.475598	0.264103	0.0329288	0.718674	0.524482	-0.226496	-0.704963	-0.0799488	0.130006	-0.468454	-0.185432	-0.908316	-0.28157	-0.317576	-0.104016	0.598482	0.111031	0.296622	-0.240292	-0.0877062	0.240416	0.0467449	-0.240582	0.360749	-1.36486	-0.494002
glucose-1/6-phosphate	-1.49619	-2.01194	3.51798	2.34827	-0.508368	-0.470619	0.275225	-0.146138	-0.0927836	0.0299802	-0.313262	-0.00852179	0.211432	-0.538645	-0.205669	1.03854	2.30803	2.3505	-0.656836	-0.387873	0.0336843	-0.264375	0.0184633	-0.127733	0.0225723	-0.102113	-0.0799009	-0.180804	0.361133	0.234684	-0.413753	0.511361	-0.146302	0.661452	-0.45954	0.14681	-0.616212	-0.534953	0.819218	0.0166482	-0.0156939	-0.072398	0.564395	-0.0270433	0.328526	0.0373789	-0.0352638	-0.364166	0.319454
glycerate	-1.12823	-1.62179	0.835529	0.507055	3.45255	-0.502554	-0.524032	-0.120362	-0.205388	-0.746679	-0.726331	-0.497269	-0.293518	-0.593404	-0.746634	0.430111	0.123767	0.677551	-0.427141	-0.495556	-0.686817	-1.22435	-1.2197	-0.240862	0.390189	0.292627	0.597884	0.627414	-0.413771	-0.43145	0.0369701	0.0963007	0.288079	0.333156	-0.956381	-0.324675	-0.502554	-0.498271	0.795289	0.0722708	0.278673	0.15764	-0.200968	0.00666939	0.153045	-0.66933	0.24264	-1.24467	0.276595
pyruvate	-2.57717	-2.49229	0.265242	0.46697	2.0227	-0.419134	-0.324558	0.0356077	0.0624124	-0.172508	-0.394108	0.675154	-0.215351	-0.366096	-0.420112	0.73501	0.470807	0.475907	-0.00192897	-0.323576	-0.854308	-1.48754	-1.16209	0.219437	0.969317	0.857971	0.772443	1.4601	-0.197224	-0.183356	-0.15899	-0.0740539	-0.210265	-0.319808	-0.787677	-0.581925	-0.344146	-0.0615621	-0.0254139	0.00829551	-0.100419	0.261198	-0.0212314	-0.0280013	0.164912	-0.274955	-0.0284334	-1.41968	-0.182032
fumarate	-2.16045	-2.54384	-0.396553	-1.1903	-0.206403	-1.26757	-2.07057	-1.31326	-1.64159	-0.991011	-0.471462	-0.733897	-0.499867	-0.973213	-0.819807	-0.34305	-0.390027	-0.27133	-0.898846	0.00802117	-0.0562229	-0.363269	-0.211809	-0.653336	0.035052	-0.160476	0.530366	0.196857	0.0741887	-0.362754	0.924598	0.344367	-0.0719781	0.178761	0.0455243	-0.189771	-0.339225	-0.310688	0.320159	-0.0325935	0.188263	-0.274961	1.36446	-0.0233929	0.139557	-0.161105	0.0872064	-0.328067	0.899042
D-sedoheptulose-1/7-phosphate	0.273772	0.540468	0.334731	0.220617	-0.15527	0.498672	0.0957844	-0.416169	-0.0359859	-0.0969031	-0.543325	-0.67832	-0.436058	-0.242458	-0.248127	-0.555901	-0.368439	0.168381	1.67411	-0.138779	0.0862429	-0.56314	-0.187403	0.620276	-0.575705	-0.220133	-0.67073	0.18466	0.958238	0.914669	0.235273	0.476042	0.178252	0.414019	-0.0322403	-0.435862	0.273238	-0.251918	0.197349	-0.21684	-0.0561623	-0.227532	0.10879	-0.370111	-0.333252	0.169058	0.0898483	-0.397643	0.0290599
dGMP/AMP	0.331235	0.0834642	0.466544	0.472248	-1.77854	-0.141256	-0.259096	0.224442	0.175034	-0.0333602	-0.14421	0.318676	0.17941	-0.736443	-0.534912	0.38423	0.317674	0.551167	0.257585	0.0933501	-0.126566	0.022734	-0.0865641	0.45458	0.131869	0.296247	-0.569559	0.168119	0.552341	0.644338	0.216506	0.49419	0.357919	0.609488	-0.173192	-0.760064	-0.525799	-0.353368	0.0904998	-0.342139	0.00761788	-0.251345	0.0855044	-0.392735	-0.116396	-0.0594958	0.0984524	1.37259	0.410882
uridine	-2.03208	-1.94165	0.345671	0.23037	-0.243975	-0.347744	-0.688608	-0.494411	-0.446288	-0.200167	-0.729691	-0.242745	-0.23012	-0.432151	-1.51383	0.590886	0.398046	0.519266	0.391723	-0.464564	-0.981257	-1.13117	-0.883871	0.0939537	0.832905	0.781166	0.456872	0.456076	0.085255	-0.0462876	-0.0770112	0.183807	-0.173709	-0.0702857	-0.852271	-0.894479	-0.20878	-0.020015	0.593886	-0.0805757	0.102794	0.402253	0.0452885	-0.177504	0.100992	-0.253231	0.140733	-1.00448	-0.0517394
succinate/methylmalonic acid	-1.69754	-1.8645	-0.400987	-0.754893	-0.360005	-0.885167	-0.973256	-0.0290603	-0.502305	-0.158485	-0.405034	0.0618273	0.0260384	-1.56702	-0.725017	-0.0714768	-0.591587	-0.265182	0.00917635	0.0101268	-0.0184208	-0.431772	-0.431772	-0.193764	-0.156738	-0.0723121	0.131578	0.586327	0.00910724	-0.140891	0.00968857	0.108197	-0.161519	0.0333194	-0.286882	-0.249447	-0.266634	-0.748267	0.0326118	-0.054543	0.681238	0.0371745	0.207134	0.196128	0.0819305	-0.00366539	0.00390797	-0.214945	-0.0206755
guanine	-1.37842	-1.80869	-0.105503	0.0956864	-0.753861	-0.415275	-0.619766	-0.0655725	-0.0695241	-0.194976	-0.430341	-0.353319	-0.183062	-0.334667	-1.03472	0.449161	0.385446	0.566152	0.590641	-0.121404	-0.559018	-1.02601	-0.745654	0.223551	0.534162	0.49011	-0.114279	0.22521	0.284174	0.0776424	-0.0339862	0.134764	-0.156513	-0.0773764	0.0050536	-0.803288	-0.372578	-0.209391	0.32934	0.0770912	0.243997	0.367601	0.00234084	-0.181673	0.0335447	-0.088482	0.0471002	-0.272878	0.596646
inosine	-2.25365	-2.70627	0.4136	0.371694	0.644303	-0.427696	-0.25169	-0.211797	-0.183165	0.00620526	-0.452349	-0.349872	-0.239305	-0.510007	-0.952261	0.304986	-0.101216	-0.340837	-0.521231	-0.396907	-0.869696	-0.603947	-0.392997	0.0244302	0.746386	0.523988	0.604751	0.295257	-0.00548558	-0.0845577	-0.0247988	0.0653014	-0.0404354	-0.0383067	-0.605766	-0.515995	-0.108447	-0.376654	0.395036	0.0490947	0.560299	0.343979	-0.0549665	0	0.155052	-0.211726	-0.0370754	-0.536645	0.0118481
nicotinate	-0.479768	-0.28549	-0.421133	0.0981216	0.113072	-0.0595448	-0.195264	0.214527	0.16639	-0.0608173	0.0774167	-0.147562	-0.035949	0.0681301	-0.134441	0.309985	-0.557354	0.344465	1.45783	0.0971174	-1.01564	-1.27754	-1.00536	0.160141	1.03797	0.674058	0.588802	0.387453	-0.0928349	-0.141593	0.0836892	0.0737423	-0.174505	-0.133861	-0.00419195	-0.680599	-0.46163	-0.0281792	0.524794	-0.0155029	0.152687	0.336601	-0.0353368	0.0751099	0.124569	-0.289565	0.0320772	-1.05461	0.148508
a-ketoglutarate	0.062681	0.227621	-0.300745	-0.693598	-0.181611	-1.14107	-1.32702	-0.694747	-0.893043	-1.01741	-0.820206	-0.509159	-0.518616	-0.568835	-0.937954	-0.149389	0.0436834	-0.251434	0.594283	-0.21268	-0.835744	-0.952091	-0.639623	-0.164538	0.725734	0.292529	0.874887	0.685266	-0.334268	-0.425302	-0.0638346	-0.014495	-0.329043	-0.458216	-0.507525	-0.481374	-0.184324	0.0525154	0.589241	0.00969307	-0.181351	0.13504	-0.0675959	0.0362004	0.175865	-0.469436	0.0248051	-1.01175	-0.212061
Pyroglutamic acid	0.248765	0.473826	-0.862285	-0.550334	0.130414	0.160724	-0.225377	0.209832	0.0252775	0.868521	-0.155458	-0.0738261	-0.16126	-0.127518	-0.376777	0.161599	-0.37828	0.432074	0.598272	-0.191819	0.222216	-0.457076	-0.271807	0.0653549	1.1726	0.877287	0.927112	0.332739	-0.636307	-0.776721	-0.0734778	0.0366873	-0.156858	-0.156858	-0.347183	-0.0861763	0.26224	-0.0756362	0.377746	0.0430655	0.116052	0.20785	-0.193416	0.214549	0.0501197	0.701292	0.382171	-0.281567	-0.0777324
hypoxanthine	0.230255	0.462102	0.245717	0.192575	0.306182	-0.0483387	-0.277697	0.0720097	0.0610212	0.199086	-0.470895	-0.595596	-0.507289	-0.204581	-0.799521	0.268512	0.0976431	0.397337	0.79856	-0.355416	-0.613765	-0.00848987	0.273699	0.0215899	1.12807	0.90606	0.814208	0.813085	-0.214803	-0.348276	-0.0492895	0.203674	-0.29038	-0.12506	-0.507205	-0.501363	0.150995	0.0493664	0.716367	0.0820096	0.149607	0.397689	-0.0745804	0.0964322	0.0991205	-0.0598727	-0.0788146	0.373235	-0.0379385
indole	0.0666948	0.00621289	-0.239067	-0.264477	0.0844985	-0.0330523	-0.400063	-0.0452815	-0.0852073	-0.21911	-0.464497	-0.44428	-0.410917	-0.279242	-0.544521	-0.018945	0.146697	-0.00963848	0.257238	-0.195373	-0.85334	-0.097628	0.169326	-0.300814	0.627429	0.38762	0.44339	0.64373	-0.097812	-0.183708	0.0261434	-0.000174593	-0.194068	-0.0592861	-0.306717	-0.417336	0.260075	-0.047636	0.632058	0.135814	0.336746	0.322727	-0.0968729	0.00780393	0.316821	-0.0826077	0.152285	0.0217744	-0.0400822
sn-glycerol-3-phosphate	-0.665422	-1.93159	0.0171834	-0.361933	0.279526	-0.0882414	-0.0378636	-0.353463	-0.586768	-0.102142	0.1681	0.653375	1.01072	-0.061548	0.113451	0.532391	0.0622269	0.32626	-1.16858	-0.011602	-0.0297868	-0.029518	-0.0740948	-0.22882	-0.417529	-0.0750114	0.566866	-0.864917	-0.0819855	-0.132157	-0.207151	-0.0261071	-0.163432	-0.307815	-0.0124343	-0.145203	-0.280084	-0.656498	-0.622392	0.0974589	0.306102	0.239447	-0.148452	-0.0623314	0.0301841	-0.143092	0.406295	-0.240089	-0.216462
3-phosphoglycerate	-0.42384	-2.39241	0.558387	0.478735	0.9102	-0.289645	0.540162	-0.156412	-0.30041	0.241088	0.360643	0.738977	1.03727	-0.251309	0.426729	0.931202	-0.0277615	0.600447	-0.590729	0.223286	-0.0738627	0.276901	0.0166152	-0.404483	-0.215038	-0.140596	0.456099	0.0354729	-0.306651	-0.257314	0.0320409	0.122333	0.233905	0.329672	-0.109904	-1.0087	-0.875047	-0.175807	0.165239	-0.0289236	0.580886	0.228275	-0.0941281	0.0415082	0.177303	-0.262124	0.0913185	-0.106319	-0.083361
phosphoenolpyruvate	0.0984248	-1.49411	0.0244439	0.0121451	1.10314	-0.111808	0.468508	-0.0531997	-0.0203014	0.268121	0.333996	0.582408	0.890144	-0.138076	0.374764	0.767562	-0.401642	0.185994	-0.0122262	0.285305	0.0234664	0.0308069	-0.300437	-0.302433	0.00869235	0.0982913	0.617131	0.0051528	-0.308106	-0.201696	-0.0645033	0.0168461	0.022418	0.0444929	-0.129048	-0.380741	-0.546375	-0.138076	0.197487	-0.021231	0.0103422	0.0562031	-0.119462	-0.0240235	0.197513	-0.156602	0.0924694	-0.326797	-0.0354786
cytidine	-0.50564	-0.577715	0.319116	1.28982	0.00490596	0.973398	0.607816	0.356164	0.245897	0.657549	-0.0963492	0.0253872	0.15608	0.536137	0.109006	0.706374	0.490457	0.598501	0.716052	-0.415813	0.399326	0.155426	0.642366	-0.342967	0.0323689	0.239258	0.270997	-0.0440077	-0.113163	-0.184823	0.0247315	-0.316774	-0.127505	-0.254091	-0.217397	-0.441222	-0.250013	-0.182013	0.0823223	0.03268	0.911934	0.585911	0.103829	0.166316	-0.00515075	-0.00272484	-0.0555638	0.473471	-0.169043
ribose-phosphate	-0.000174593	-0.000174593	0.488936	-0.0480939	0.615231	-0.670292	-0.284422	-0.515908	-0.682548	-0.515799	-0.0790321	0.65797	-0.419518	-0.324595	-0.155879	0.354771	0.275861	0.154365	-0.000174593	0.166599	-0.00731158	-0.08015	0.0337356	-0.968587	-0.569248	-0.124637	0.609189	1.0837	-0.459499	-0.417	-0.033199	0.187519	-0.406223	0.344472	-0.237067	-0.748806	-0.3706	0.0240104	-0.393692	-0.0041856	0.702707	-0.0610137	-0.145351	0.112093	0.423877	-0.0128808	-0.3604	-0.416536	-0.328594
NAD+	-0.278276	-0.377812	0.637728	0.649635	-0.171081	-0.0766044	1.20625	0.00841719	-0.00592139	0.15378	-0.27169	-0.158784	0.0107001	-0.119234	-0.187028	-0.160526	0.443183	0.0387463	0.20715	-0.15117	-0.0116379	-0.038406	-0.0769738	-0.128793	-0.0838965	-0.00420735	-0.0495763	-0.0923955	0.0506261	-0.0112448	0.640408	0.819078	0.0857875	0.0956353	-0.162673	-0.248756	-0.260442	-0.0760756	0	-0.217337	0.212857	0.0542712	0.861608	0.0497819	-0.406903	0.0403845	0.0492685	-0.0996564	0.691543
ornithine	-0.160137	0.150076	-0.20931	-0.223697	0.469205	-0.248625	-0.195739	-0.460691	-0.475461	-0.0454095	0.0264852	-0.276522	-0.382718	-0.116045	-0.177547	0.376248	-0.117374	-0.0619234	-0.11305	-0.319847	-0.418743	0.0512996	0.145403	0.0463756	0.534951	-0.315311	0.371162	0.0526414	0.299796	-0.326703	0.453623	0.0154422	0.136902	0.0719217	-0.0966939	-0.437278	-0.306465	0.041708	0.0589873	-0.108766	0.28426	0.405857	0.293399	-0.266009	-0.247405	-0.213258	-0.159253	0.316983	0.226931
UDP-D-glucuronate	0.10043	-0.0283422	0.108739	-0.0807969	-0.202554	0.0239929	0.153	-0.321417	-0.176161	0.223385	-0.105549	-0.0961237	0.112408	-0.096884	-0.034332	0.25532	-0.205334	0.21778	0.731425	-0.00647676	0.0641323	0.144794	0.155594	-0.195765	-0.328284	-0.23951	-0.190201	0.130725	0.0907934	-0.0968933	-0.0266637	0.140784	0.187458	0.247177	-0.15326	-0.148111	-0.185141	-0.162271	0.152402	-0.0853932	0.27183	0.113748	-0.137008	-0.0986496	0.0962172	-0.0349349	-0.029526	-0.0379479	-0.189953
UDP-D-glucose	-0.0892902	-0.221699	0.149043	0.160027	-0.2042	0.0529503	0.307344	-0.0942042	-0.0202036	0.178123	-0.15867	0.0136657	0.143642	-0.0852269	-0.0100126	0.293601	0.135047	0.14381	0.29093	-0.0605332	-0.0217419	-0.00534865	0.053611	-0.127379	-0.116902	-0.0437841	-0.102853	0.0233482	0.159729	0.0425457	0.0521598	0.115386	0.167147	0.227311	-0.0629836	-0.294248	-0.268382	-0.159981	0.0501187	-0.0444511	0.175708	-0.00617329	0.0590659	-0.0183551	0.0918549	-0.003086	0.0453745	-0.030295	0.0410407
UDP-N-acetyl-glucosamine	-0.133269	-0.281507	0.403469	0.351	-0.291464	-0.0309259	0.301928	-0.0385428	-0.0178586	0.116308	-0.241389	-0.0183618	0.14848	-0.31774	-0.131644	0.3811	0.434058	0.52649	0.0529189	-0.0849313	0.0107266	-0.0996284	-0.0486187	-0.0995357	-0.179856	-0.0476969	-0.174331	-0.006531	0.211252	0.113769	0.0550876	0.058388	0.214374	0.257305	-0.0760622	-0.366713	-0.324137	-0.226592	-0.00130384	-0.118862	0.183204	0.00151351	0.0736766	-0.0152938	0.0596036	0.00805245	0.0884591	-0.128661	0.0193077
ADP-D-glucose	-0.0702297	-0.322732	0.410039	0.354141	-0.199998	-0.246343	-0.135104	-0.394494	-0.253124	0.0356218	-0.0158043	-0.161502	0.0560947	-0.202196	0.500284	0.230669	0.419577	0.139345	0.272805	0.212463	0.124792	0.0867182	0.149458	-0.250091	-0.0753537	0.0353331	0.0848889	-0.130822	0.263744	0.21564	-0.0135027	0.300271	0.172357	0.300271	0.308484	-0.276383	-0.233837	-0.313244	-0.0131914	-0.0763927	0.230049	0.0311561	-0.0590315	-0.136678	0.106182	0.0455464	0.0398371	0.134027	-0.0509358
NADP+	0.093254	-0.00878432	1.01777	1.10323	-0.271865	0.291485	0.336487	-0.142657	0.0449498	0.374312	0.196797	-0.00802057	0.0702466	0.0805437	0.695977	0.31016	0.762835	0.562635	0.540288	0.111853	0.394109	0.158923	0.11444	-0.227112	-0.141522	-0.0759907	-0.00155924	0.0888257	0.125926	0.0158622	-0.0093646	0.275177	0.194359	0.26779	0.326565	-0.178619	-0.145352	-0.218181	0.0792219	-0.0870397	0.213755	-0.0768441	-0.0133967	-0.0707642	0.116712	0.0174636	0.00435614	0.0964131	-0.110827
dATP	-1.54848	-2.2274	-1.24828	-1.01467	-0.104075	-0.789373	0.173834	0.258019	0.202012	-0.122457	0.225334	-0.18872	0.0771102	0.290443	-0.285188	0.112948	0.253	0.657683	0.189739	0.189636	-0.0900728	-0.0441096	0.0511587	-0.205286	-0.266756	-0.206352	-0.215749	0.125108	-0.234213	-0.617203	0.110505	0.275336	0.145985	0.170382	0.0920356	-0.199008	-0.12642	0.144772	0.187878	0.75424	0.0738961	-0.0181926	-0.0783398	0.272394	0.103826	-0.0312314	-0.00927067	-0.201509	-0.392449
ATP	-0.872046	-1.28812	-0.821211	0.330449	-0.0765941	0.0782986	0.103849	-0.511974	-0.429727	0.370633	-0.0720217	-0.00857437	0.0242211	-0.158244	-0.0744855	0.367052	0.689582	0.874681	0.473508	0.0618819	0.516495	0.0127791	0.0680499	-0.242167	-0.467426	-0.324702	-0.090968	0.137359	-0.31597	-0.683818	-0.249924	0.366196	0.153098	0.231182	-0.191285	-0.150151	-0.0802642	-0.078189	0.334259	-0.196653	0.0433508	0.0837075	-0.241195	0.111258	0.152918	0.189438	0.0737991	-0.217276	-0.433289
FAD	-1.21629	-1.40722	0.932722	0.767532	-0.488353	0.141356	0.379157	-0.0200633	0.0268733	0.475734	-0.318477	-0.0252556	-0.0116987	-0.182443	-0.0957654	0.570796	0.523819	0.677872	0.0722766	-0.127562	0.101255	-0.0415438	0.0170508	-0.178767	-0.324477	-0.169533	-0.245577	-0.0429756	-0.0644938	0.0617337	0.0640062	0.135445	0.0665388	0.253261	-0.020948	-0.211823	-0.236606	-0.0777567	-0.00200129	-0.00331801	0.266866	0.17978	0.0537197	0.00931556	0.0974354	0.14977	0.0362473	-0.0871064	-0.0153654
IMP	-1.23786	-1.4619	0.777278	0.820617	-0.605878	-0.259704	0.0716407	-0.425832	-0.276982	-0.414269	-0.352898	-0.584343	-0.300061	-0.228271	-0.235395	0.444287	0.430848	0.491288	-0.683959	0.0132858	-0.361552	-0.338152	-0.180484	0.151245	-0.00859249	0.0352612	-0.107419	0.0649652	0.356552	0.332044	0.444099	0.340581	0.379596	0.374506	-0.105703	-0.538447	-0.329473	-0.179361	-0.0323062	-0.00265524	0.116235	-0.203978	0.21865	-0.192706	0.0236798	-0.351879	-0.028391	-0.0508945	0.362369
FMN	-1.52809	-1.89987	0.784619	0.84287	-0.666404	0.159487	0.468489	-0.109685	-0.0165502	0.134796	-0.208556	-0.233119	0.0473615	0.0546123	-0.286187	0.588795	0.786233	0.642863	-0.085305	-0.0637516	0.020635	0.0758247	0.0634631	0.0760474	-0.113206	-0.0613411	-0.145129	-0.0513047	0.161596	0.15261	-0.15371	-0.286222	0.191539	0.511483	-0.384708	-0.475504	-0.219526	0.0665828	0.0610897	-0.106071	0.177608	0.165425	-0.166172	-0.013466	0.1362	0.106912	0.204107	0.0106555	-0.358717
6-phospho-D-gluconate	-1.23609	-2.40154	-0.451915	0.458024	0.0503174	-0.991783	0.368609	-0.250185	-0.307663	-0.0329245	-0.011816	0.00152085	0.16765	-0.0806656	0.283939	0.516482	0.560559	0.82624	-0.860682	0.0233457	0.058003	-0.173452	-0.0228792	-0.161848	-0.49665	-0.374477	-0.272723	0.0942397	0.264302	0.111191	0.114952	0.0878073	0.255187	0.412728	0.0156057	-0.104991	-0.535037	-0.17494	0.194937	-0.0840416	0.200967	0.0512847	-0.00323756	0.00422389	0.0429249	-0.0278874	0.0743853	-0.361868	-0.0900701
glutathione disulfide	-1.64073	-1.80661	0.716221	0.486985	-0.547712	-0.347186	-0.157109	-0.423022	-0.568374	-0.38476	-0.62012	-0.360539	-0.154304	-0.344809	-0.262526	0.456871	0.511617	0.541341	-0.824923	0.0106286	0.0106481	-0.522692	-0.426258	-0.252148	-0.628422	-0.480856	-0.253753	-0.157565	0.118763	0.0419985	0.127269	0.172475	0.298858	0.443401	-0.0269191	-0.4046	-0.424778	-0.19992	0.149973	-0.0511206	0.182724	-0.027894	0.0804487	-0.013456	0.0654595	-0.0968748	0.128715	-0.566079	-0.0477113
4-phosphopantothenate	-1.98206	-2.58367	0.774383	0.373023	-0.54851	-0.594012	-0.152443	-0.106126	-0.238941	-0.427137	-0.409116	-0.308039	-0.11675	-0.658562	-0.893893	0.611649	0.750399	0.721027	-0.989752	0.0742307	-0.0110016	-0.570684	-0.391034	-0.0353778	0.0217075	0.0792365	-0.120268	0.0316925	0.0886228	0.228271	0.0857396	0.301253	0.136132	0.623411	-0.133712	-0.379755	-0.310511	-0.109339	0.109863	-0.132704	0.0203485	0.115296	-0.0212806	-0.106126	0.041654	-0.0110016	0.124634	-0.473993	0.19714
cyclic-AMP	-2.89239	-3.2218	0.854911	0.154885	-1.0489	-0.862631	-0.98537	-0.549802	-0.923108	-0.23001	-0.329212	-0.682795	-0.404383	0.0324758	-0.818653	0.415333	0.645288	0.784768	-0.504046	0.0304996	-0.00990072	-0.274058	-0.0794949	-0.205911	-0.336775	-0.198813	-0.174033	0.164342	-0.204215	-0.297377	0.0169947	0.186763	0.155148	0.217024	-0.313869	-0.43801	-0.363781	-0.0309774	0.147855	-0.121427	0.0940513	0.192135	-0.081986	0.181824	-0.096838	0.00965544	0.073918	-0.409445	-0.0774775
Sedoheptoluse bisphosphate	-1.74098	-3.02959	0.668127	0.231574	0.583431	-0.396311	0.0634772	-0.472243	-0.532286	-0.20516	0.0220986	-0.103201	0.159141	-0.291629	0.201565	0.449076	0.314132	0.369744	-1.40481	0.0236642	0.0820649	-0.183442	-0.20826	-0.323126	-0.429841	-0.278755	-0.120152	0.129394	-0.0954839	-0.240759	0.199638	0.17186	0.574511	0.739069	-0.0567744	-0.49554	-0.285436	-0.14372	0.159141	-0.191112	0.0673776	-0.109892	-0.0793744	-0.0873806	0.0163929	0.0295	0.059667	1.50338	0.112804
2_3-Diphosphoglyceric acid	-1.51753	-2.75817	0.398058	0.549906	0.243328	0.208168	0.547633	-0.504252	-0.38448	0.124274	0.152401	0.333904	0.589736	-0.0906063	0.340017	0.900298	0.208312	1.00842	-0.918443	0.191378	0.433766	-0.137179	-0.132336	-0.241009	-0.785264	-0.49962	-0.384896	0.0437677	0.509015	0.438625	0.0758988	0.146278	0.506204	0.577416	0.0394452	-0.196808	-0.369175	-0.267129	0.199639	-0.25626	0.305006	-0.0222251	-0.251198	-0.201237	0.0659707	0.065628	0.194941	-0.368164	-0.278508
Pyrophosphate	-1.47665	-2.68696	-0.654929	-0.626308	0.110526	-0.000174593	0.245583	-0.399829	0.0730073	0.0160299	0.14989	0.118776	0.540337	-0.100447	0.368483	-0.0660961	-0.611944	-0.158749	-1.54009	0.237938	0.366214	-0.0200734	-0.0524895	-0.184056	-0.808135	-0.562421	-0.312996	-0.104091	0.448727	0.42398	0.208239	0.181612	0.256766	0.40653	0.102775	-0.000174593	-0.000174593	-0.241697	0.140553	0.346529	0.40383	0.130391	-0.223465	-0.0436949	0.265622	0.0497096	0.14023	-0.246406	-0.113279
lactate	-4.83839	-6.31274	1.5312	1.33818	0.310133	-0.347346	-0.301835	-0.22011	-0.3085	-0.348051	-0.872414	-0.404293	-0.344074	-0.626512	-0.731431	0.801289	1.18781	1.98264	-1.40375	-0.307219	-0.93346	-1.00753	-0.67567	0.0194451	0.407297	0.319562	0.399538	0.44958	-0.259016	-0.264231	-0.717827	0.140907	-0.214516	-0.496911	-0.51857	-0.340141	-0.188496	0.0485424	0.591474	0.0161752	0.334892	0.529232	-0.367535	-0.0254356	0.128317	-0.247949	0.061533	-0.893765	-0.382002
myo-inositol	-5.97747	-0.000174593	3.15373	3.34685	0.231953	-0.397589	0.382585	-0.462731	-0.515481	-0.771485	-1.42506	-0.529818	-0.456937	-1.03477	-0.759605	0.938969	2.81777	3.05064	-3.56492	-0.413278	-1.46204	-1.36253	-1.04013	0.0841286	-0.0977537	-0.0242836	0.049121	0.557856	-0.258852	-0.268027	-0.0706912	-0.832206	0.900786	0.658147	-0.827536	0.670524	-0.666497	0.071731	0.754027	0.012986	-0.00916148	0.00490911	-0.0544508	-0.114243	0.176016	-0.350049	0.0444472	-1.32157	-0.00186525
Conc_tested_uM	3.5	4.77	4	3.61	2.05	0.899	0.857	0.515	1.79	0.581	2.37	0.226	0.423	2.55	2.68	5.2	3.51	1.7	1.4	1.42	0.423	4.28	2.93	1.765	1.19	2.63	1.415	0.053	3.96	1.61	0.944	2.35	1.8	2.37	2.35	1.48	1.06	3.78	0.248	4.33	2.32	1.42	4.48	1.42	1.46	0.822	0.255	2.155	1.54
EC50_nM	117	520	428	196	283	205	161	142	194	146	237	22.6	42.3	255	268	293	242.5	370	179	142	148	400	433	345	176.5	361	106	5.3	206	300	36.8	215.5	72.6	350	235	282	448	378	24.8	263	296	350	140	154	180	251	25.5	58.1	406
Factor_XEC50	29.9145	9.17308	9.34579	18.4184	7.24382	4.38537	5.32298	3.62676	9.2268	3.97945	10	10	10	10	10	17.7474	14.4742	4.59459	7.82123	10	2.85811	10.7	6.76674	5.11594	6.74221	7.28532	13.3491	10	19.2233	5.36667	25.6522	10.9049	24.7934	6.77143	10	5.24823	2.36607	10	10	16.4639	7.83784	4.05714	32	9.22078	8.11111	3.2749	10	37.0912	3.7931
[truncated: 32 more columns]
